# Supplementary material for: Anticancer evaluations of iodoquinazoline substituted with allyl and/or benzyl as dual inhibitors of EGFR WT and EGFR T790M : design, synthesis, ADMET and molecular docking
Source: Royal Society of Chemistry journal article supplement (doi:10.1039/d4ra00502c), 2024-01-01

23 repetitions  
OBSERVE H1, 300.0687875 MHz  
DATA PROCESSING  
FT size 65536  
Total time 19 min, 19 sec

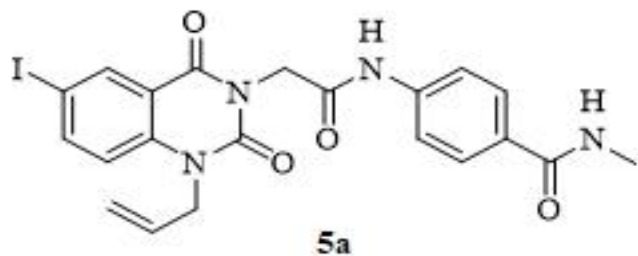

5a

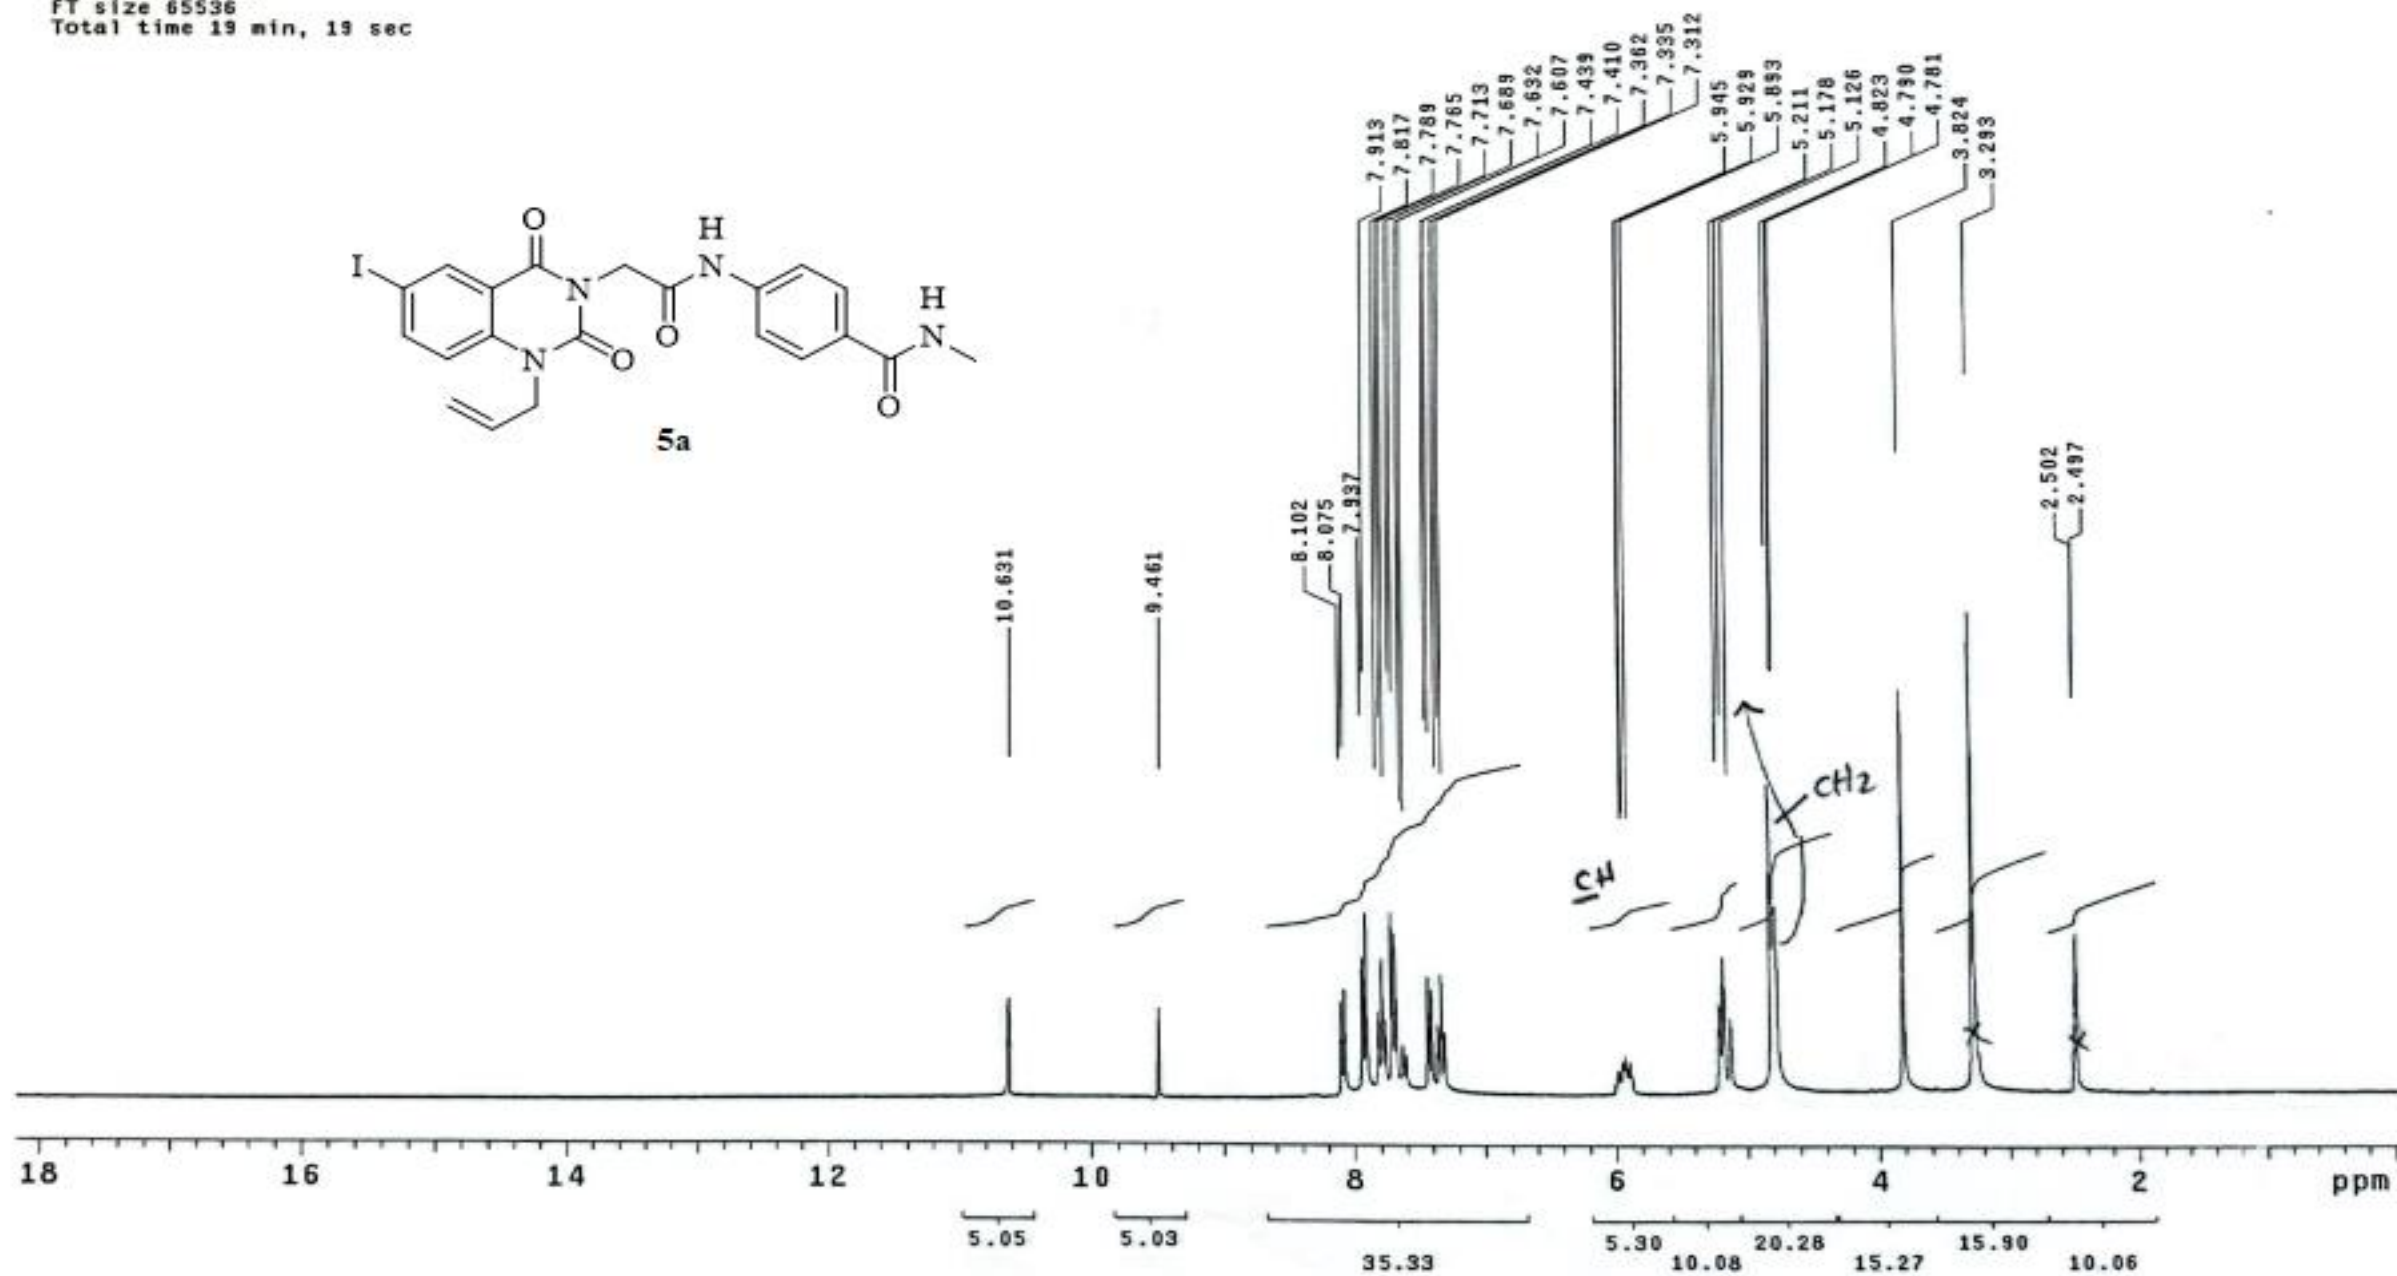

168.96  
167.12  
165.23  
154.65  
151.22  
146.56  
134.48  
133.25  
131.37  
129.05  
125.62  
120.95  
115.00  
105.94  
94.36  
54.13  
50.76  
40.61  
40.40  
40.19  
39.98  
39.78  
39.57  
39.36  
14.40

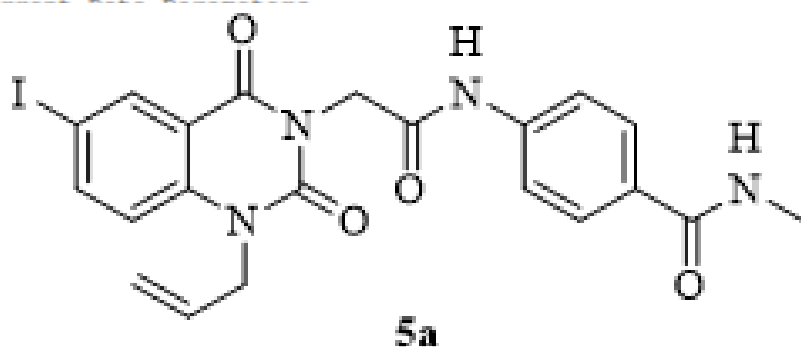

R<sub>2</sub>  
DM 20.800 usec  
DE 6.50 usec  
TE 298.1 K  
D1 2.00000000 sec  
D11 0.03000000 sec  
TD0 1

===== CHANNEL f1 =====  
SFO1 100.6379178 MHz  
NUC1 13C  
P1 10.00 usec  
PLW1 45.00000000 W

===== CHANNEL f2 =====  
SFO2 400.1916008 MHz  
NUC2 1H  
CPDPRG[2] waltz16

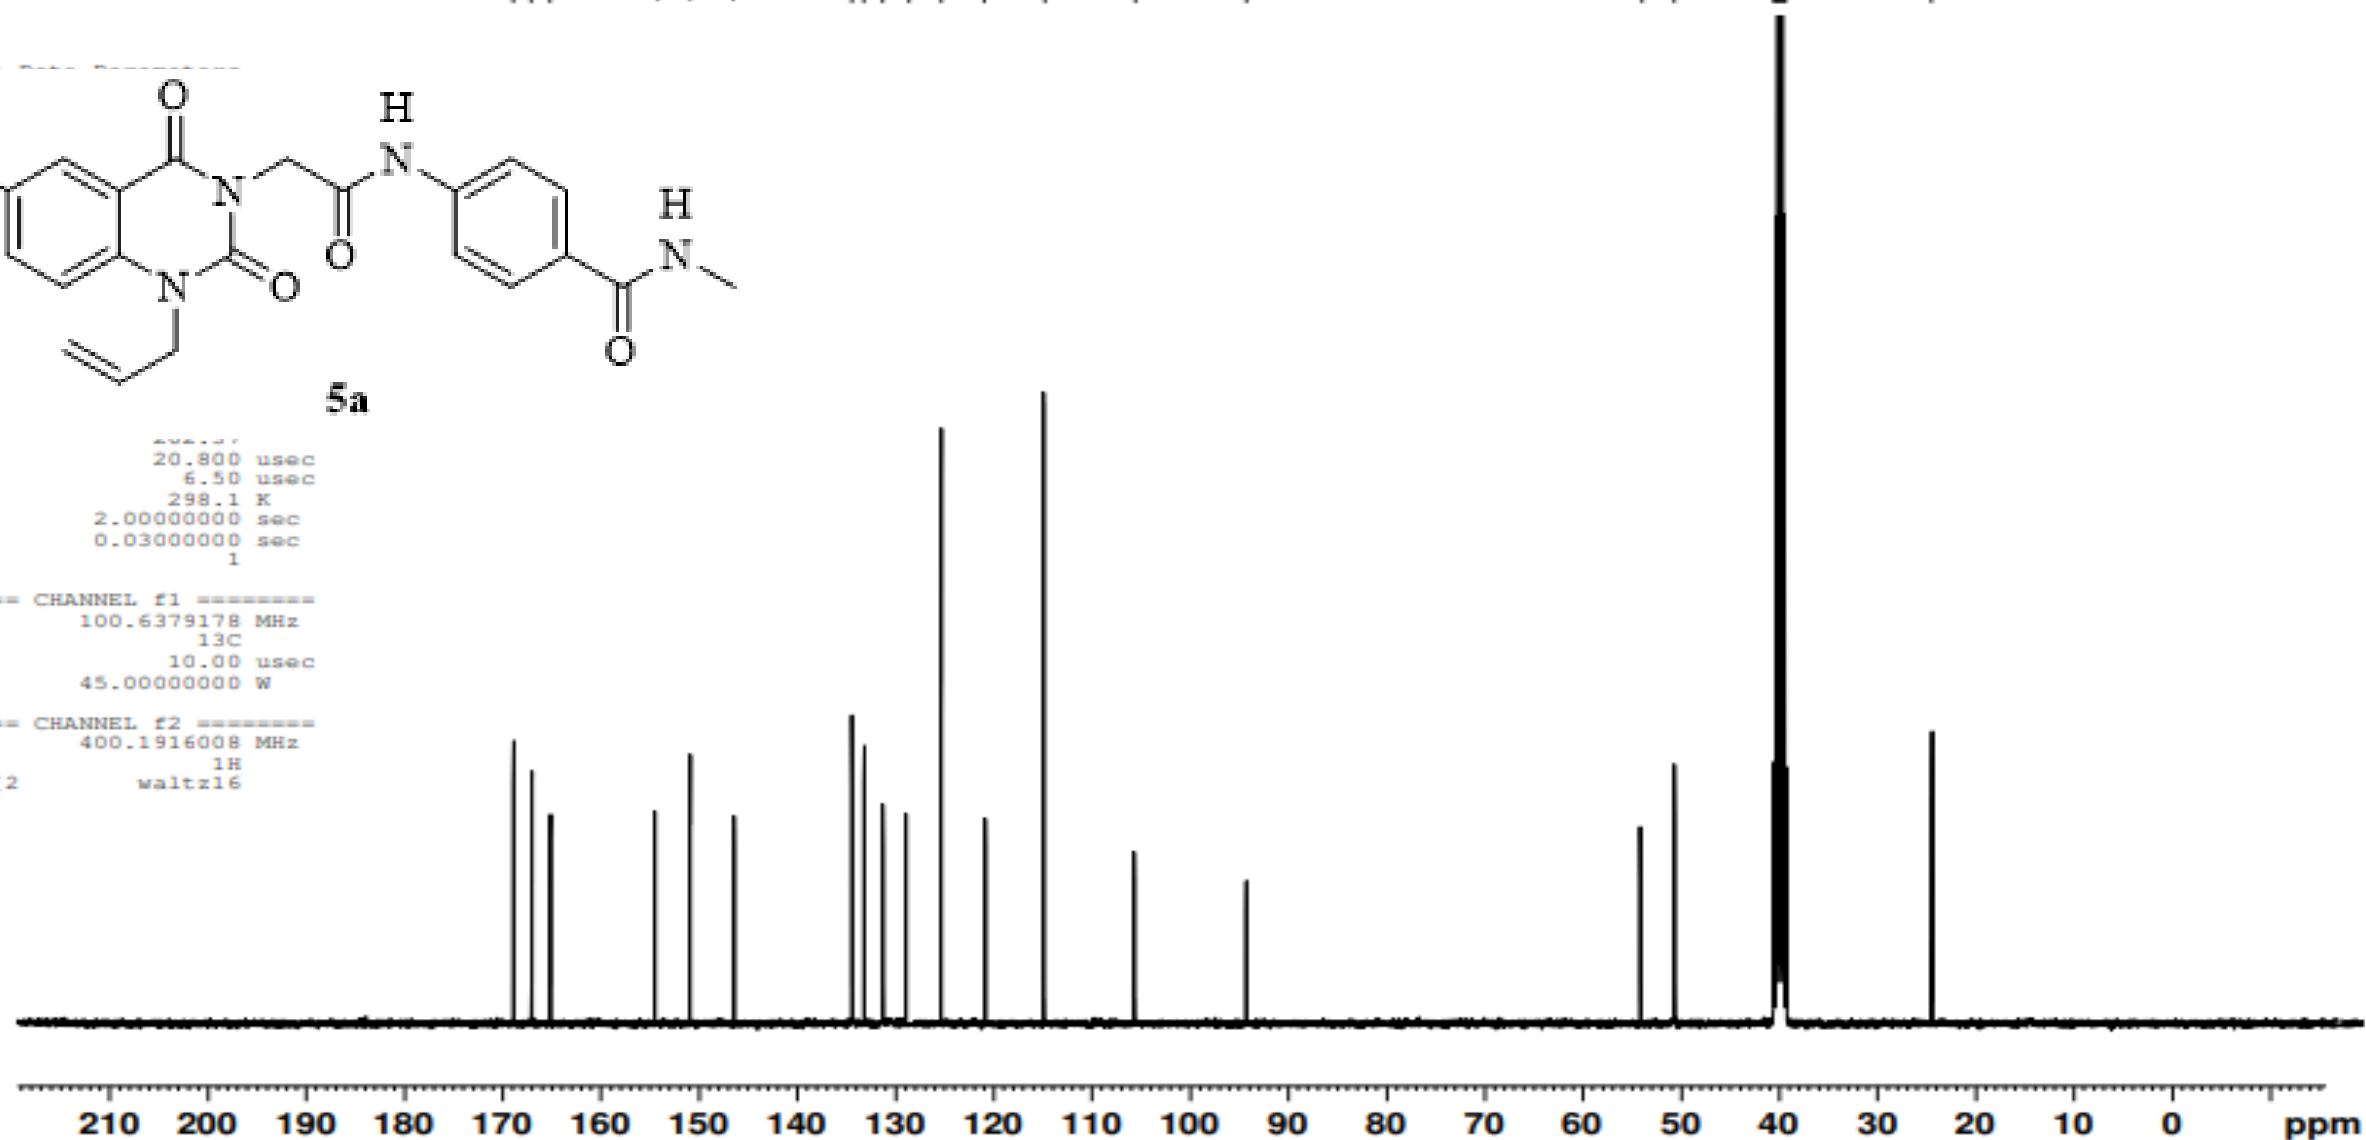

Pulse sequence: s2pu1  
Solvent: DMSO  
Temp. 30.0 C / 303.1 K  
Mercury-300BB "NMR300"

Relax. delay 1.000 sec  
Pulse 74.1 degrees  
Acq. time 4.004 sec  
Width 8000.0 Hz  
9 repetitions  
OBSERVE H1, 300.0687875 MH  
DATA PROCESSING  
FT size 65536  
Total time 19 min, 19 sec

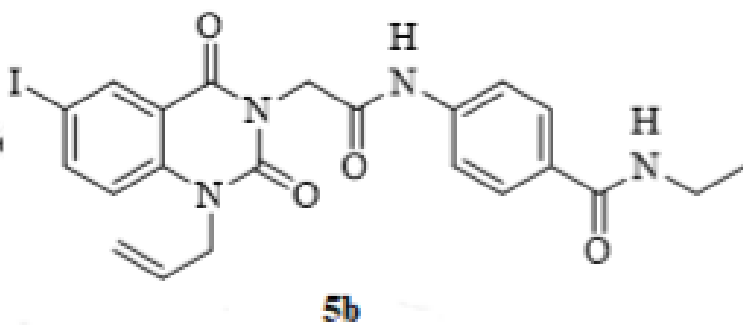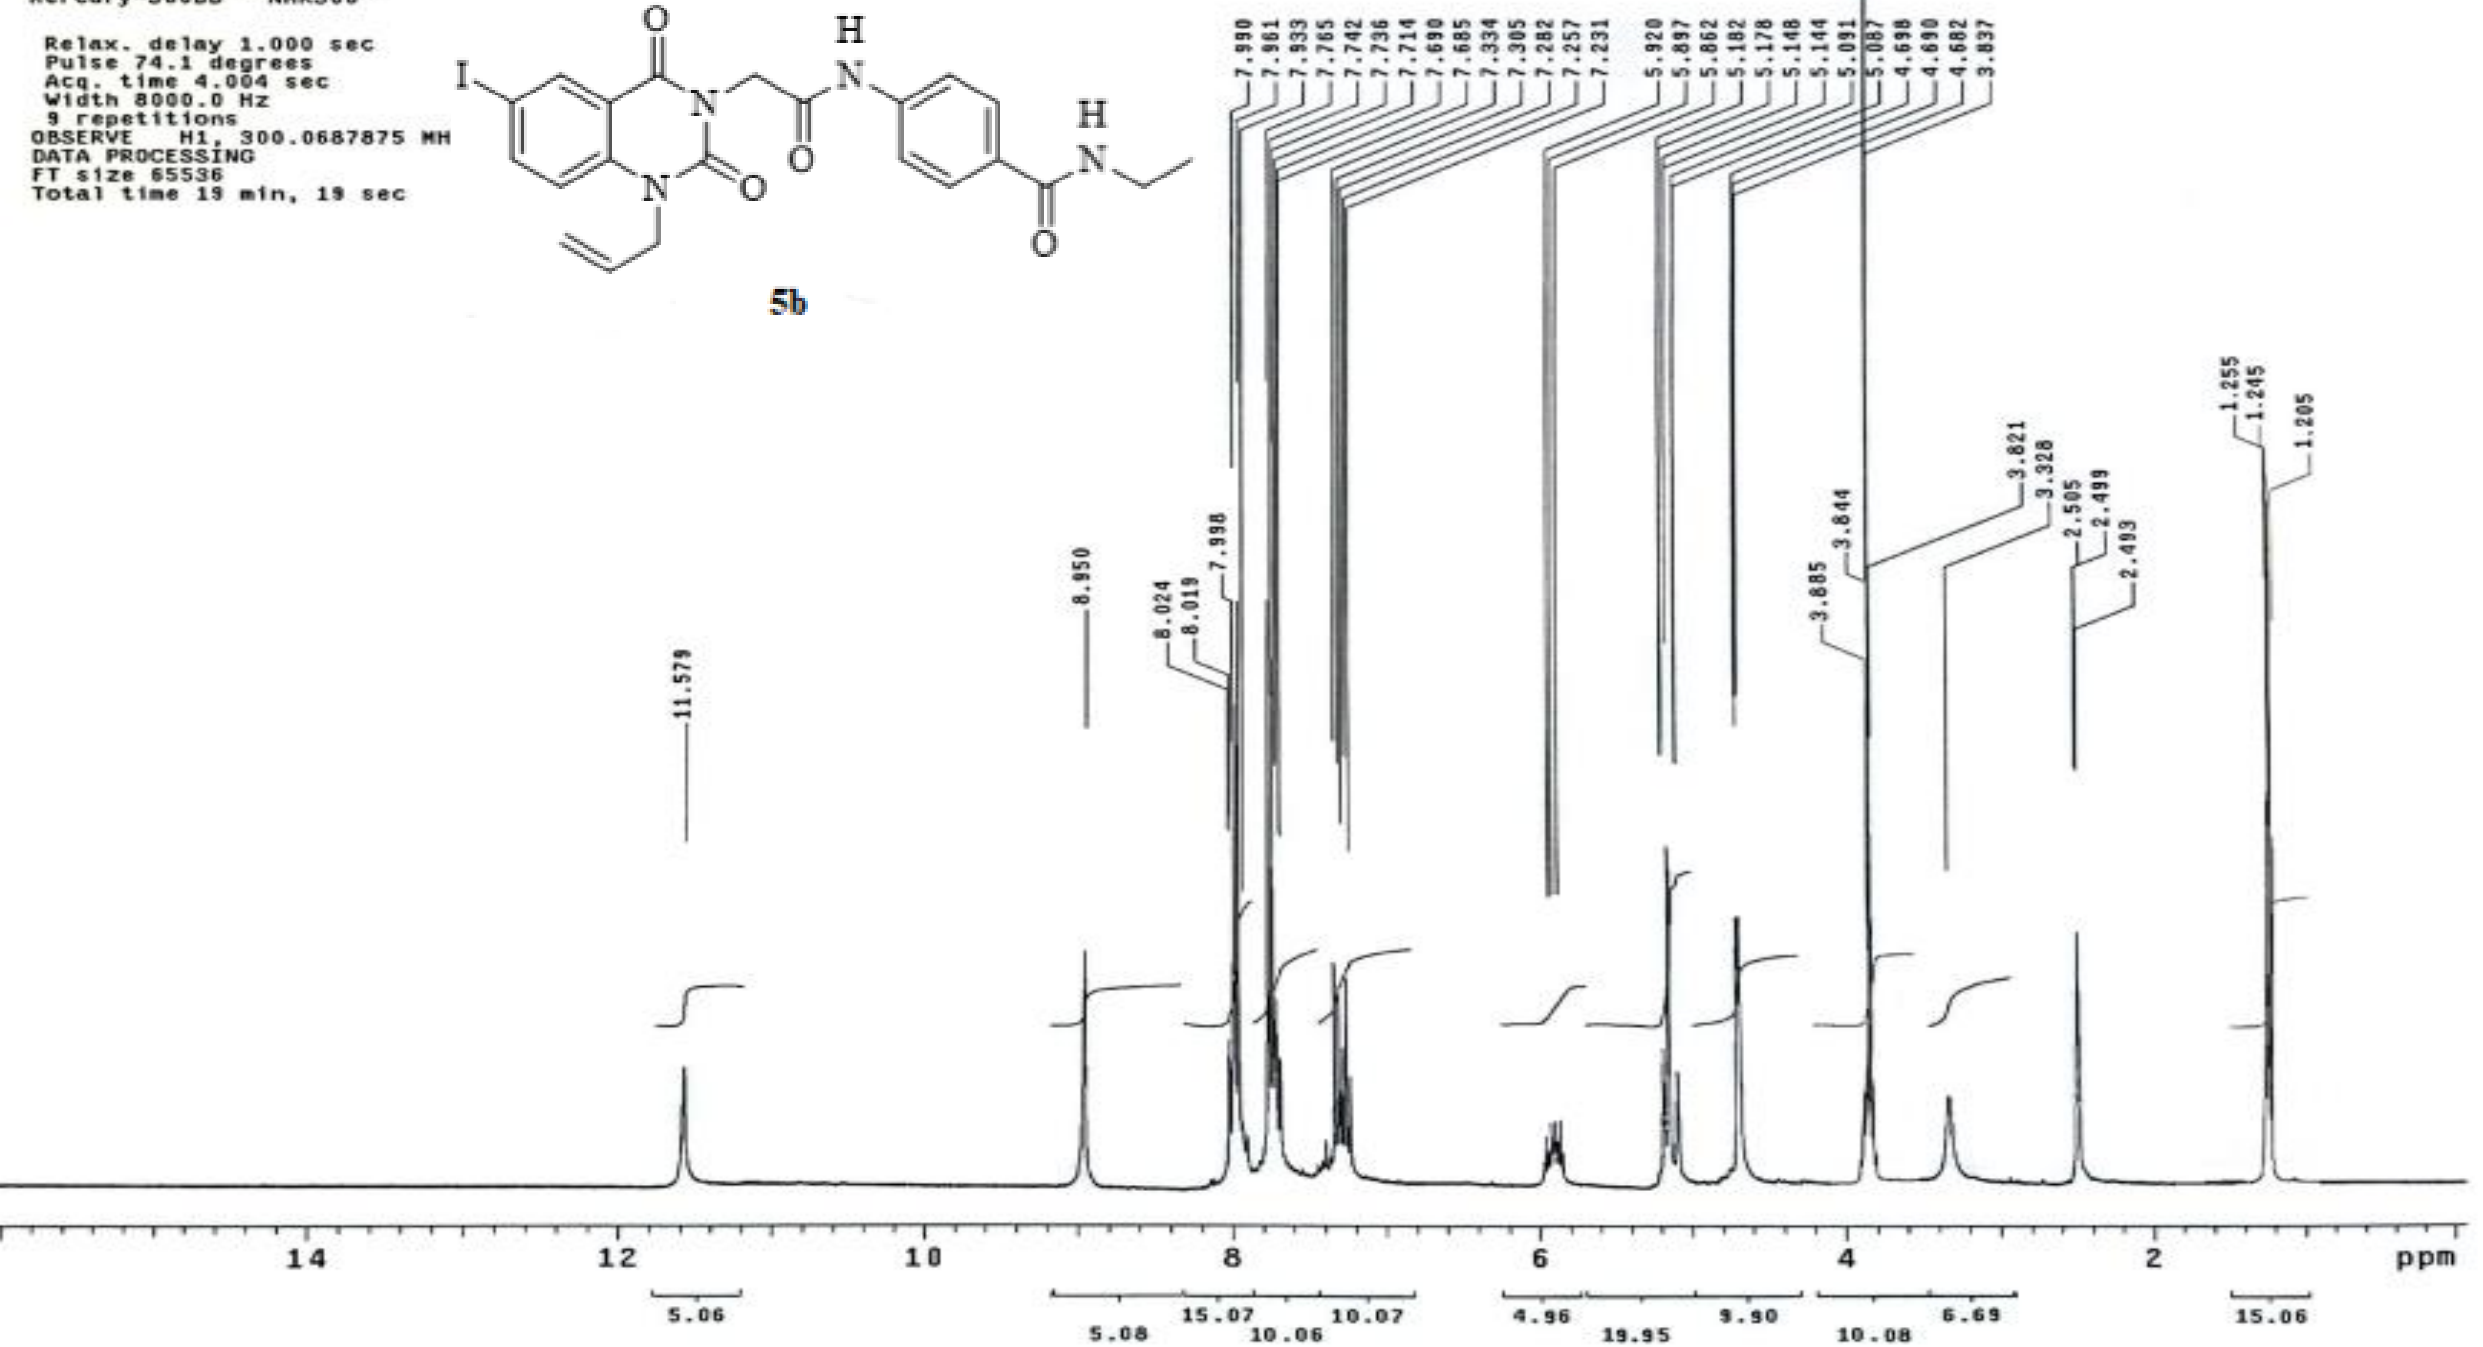

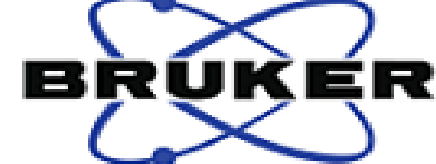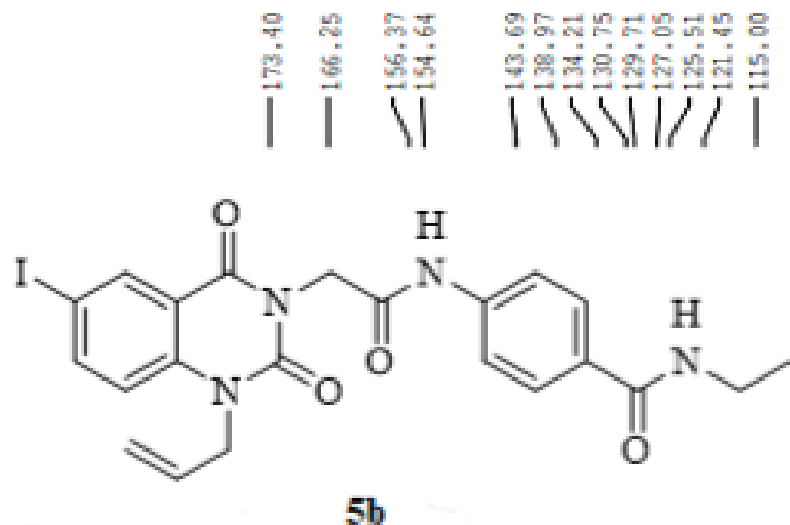

173.40  
166.25  
156.37  
154.64  
143.69  
138.97  
134.21  
130.75  
129.71  
127.05  
125.51  
121.45  
115.00

93.33

58.35  
54.65  
40.36  
40.16  
39.95  
39.74  
39.53  
39.32  
39.11  
29.76  
16.62

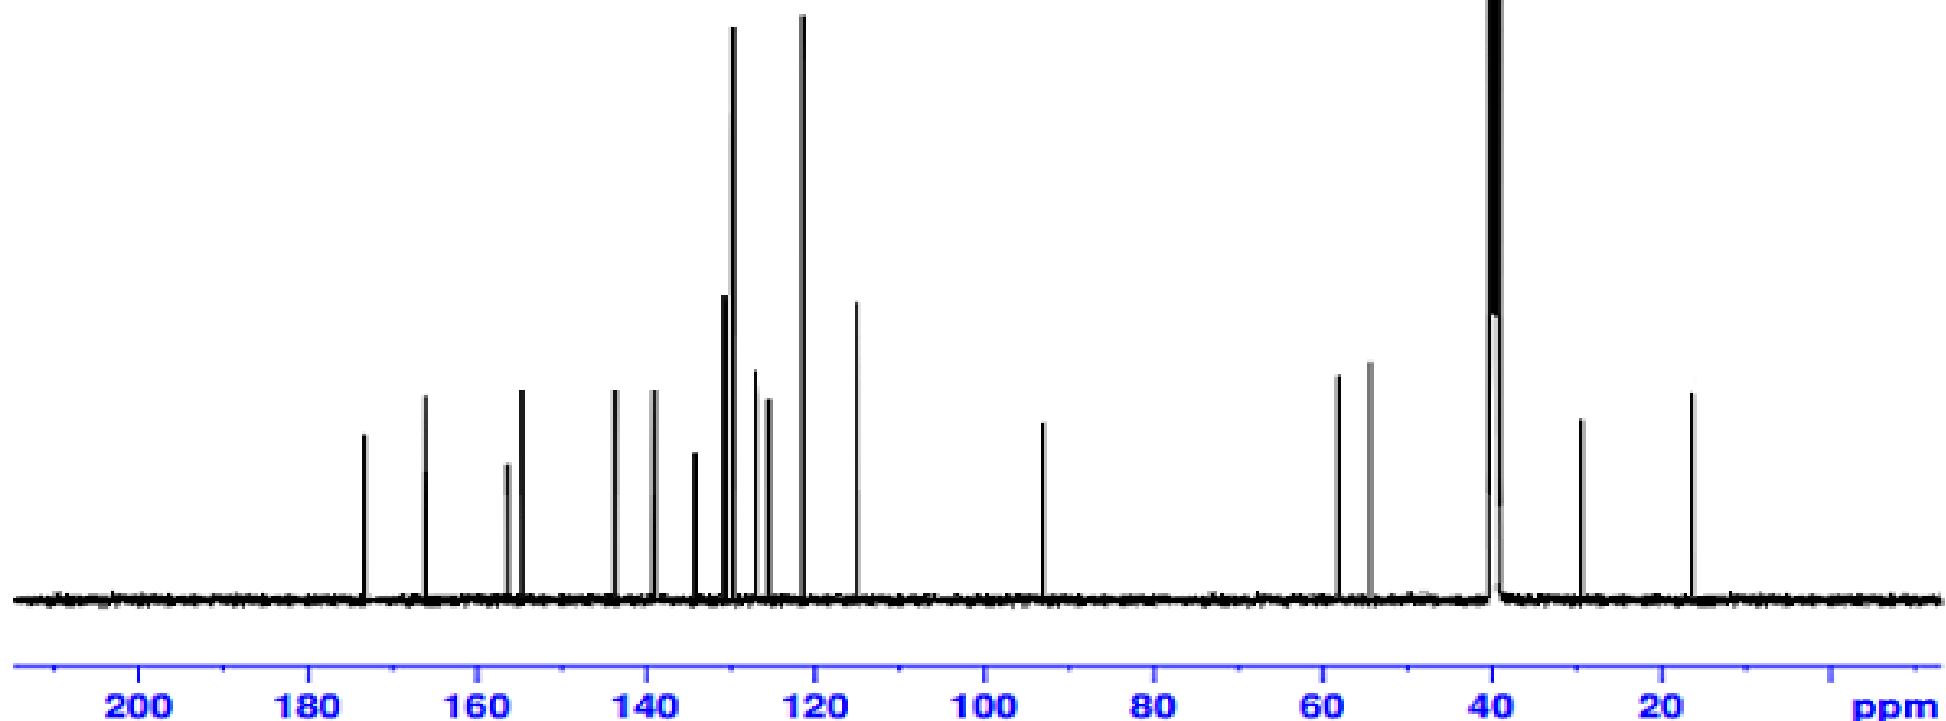

Current Data Parameters  
NAME 2  
EXPNO 3  
PROCNO 1

F2 - Acquisition Parameters  
Date\_ 20220605  
Time 13.03  
INSTRUM spect  
PROBHD 5 mm PABBO BB/  
PULPROG zgpg30  
TD 65536  
SOLVENT DMSO  
NS 1412  
DS 4  
SWH 24038.461 Hz  
FIDRES 0.366798 Hz  
AQ 1.3631488 sec  
RG 205.37  
DW 20.800 usec  
DE 6.50 usec  
TE 300.0 K  
D1 2.00000000 sec  
D11 0.03000000 sec  
TD0 1

----- CHANNEL f1 -----  
SFO1 100.6278588 MHz  
NUC1 13C  
P1 10.00 usec  
PLW1 47.00000000 W

----- CHANNEL f2 -----  
SFO2 400.1516006 MHz  
NUC2 1H  
CPDPRG(2) waltz16  
PCPD2 90.00 usec  
PLW2 18.00000000 W  
PLW12 0.34722000 W  
PLW13 0.28125000 W

F2 - Processing parameters  
SI 32768  
SF 100.6177975 MHz  
WDW EM  
SSB 0  
LB 1.00 Hz  
GB 0  
PC 1.40

Author = delta3  
 Content = single\_pulse  
 Creation\_time = 29-JUL-2012 19:0  
 Current\_time = 29-JUL-2012 12:3  
 Data\_format = 1D COMPLEX  
 Dim\_size = 13107  
 Dim\_title = 1H

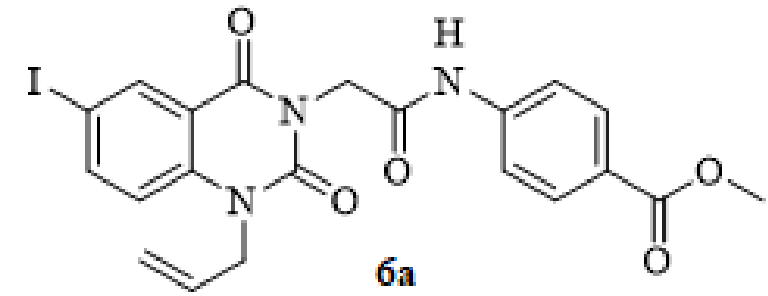

```

X_resolution = 0.76446839 [Hz]
Irr_domain = 1H
Irr_offset = 5.0 [ppm]
Irr_freq = 500.15991521 [MHz]
Tri_domain = 1H
Tri_offset = 5.0 [ppm]
Tri_freq = 500.15991521 [MHz]
X_acq_duration = 1.30809856 [s]
Digital_filter = TRUE
Filter_factor = 8
Af_version = 1
Delay_of_start = 1.99999974 [s]
Acq_delay = 9.82 [us]
Digital_filter_status = 2P
Clipped = FALSE
Dc_balanced = FALSE
X90 = 13.1 [us]
Irr90 = 13.1 [us]
Tri90 = 10 [us]
Qua90 = 10 [us]
Qui90 = 10 [us]
Sex90 = 10 [us]
Sep90 = 10 [us]
Oct90 = 10 [us]
Non90 = 10 [us]
Dec90 = 10 [us]
X90_hi = 92 [us]
Irr90_hi = 92 [us]
Tri90_hi = 10 [us]
Qua90_hi = 10 [us]
Qui90_hi = 10 [us]
Sex90_hi = 10 [us]
Sep90_hi = 10 [us]
Oct90_hi = 10 [us]
Non90_hi = 10 [us]
Dec90_hi = 10 [us]
X90_lo = 92 [us]
Irr90_lo = 92 [us]
Tri90_lo = 10 [us]
Qua90_lo = 10 [us]
Qui90_lo = 10 [us]
Sex90_lo = 10 [us]
Sep90_lo = 10 [us]
Oct90_lo = 10 [us]
Non90_lo = 10 [us]
  
```

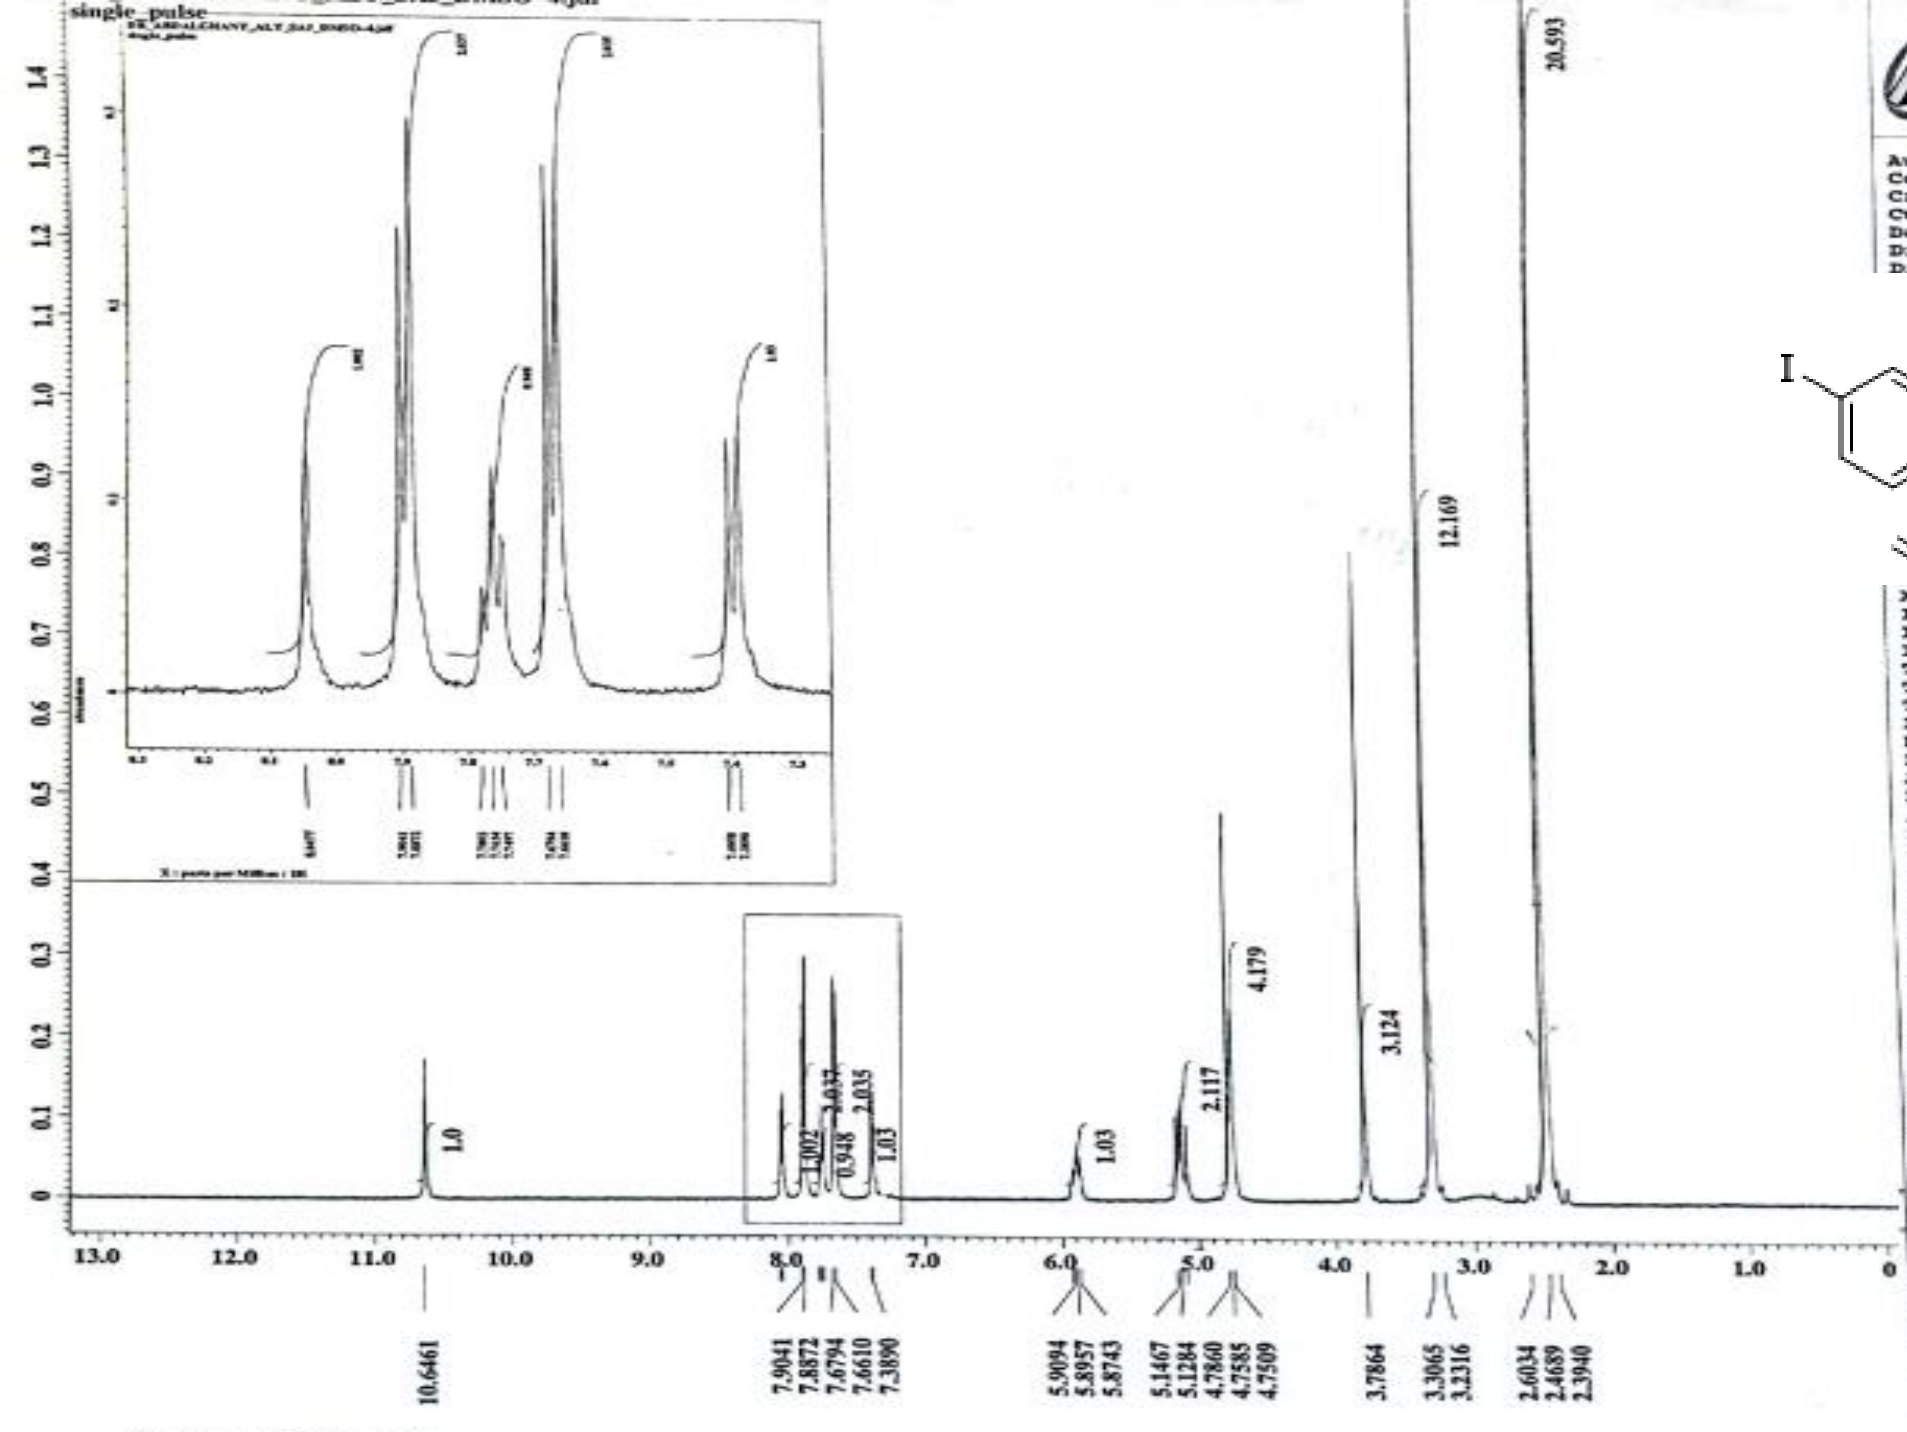

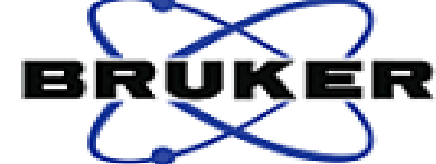

Current Data Parameters

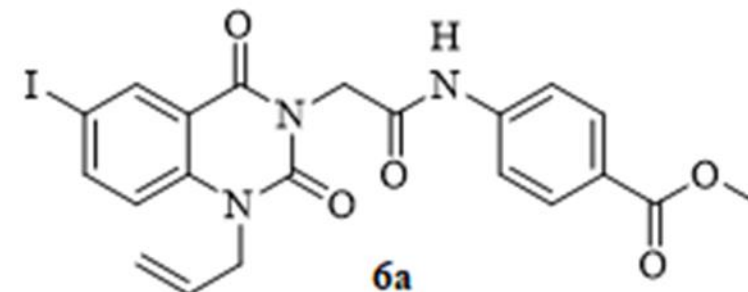

DS 4  
SWH 24038.461 Hz  
FIDRES 0.366798 Hz  
AQ 1.3631488 sec  
RG 205.37  
DW 20.800 usec  
DE 6.50 usec  
TE 300.0 K  
D1 2.00000000 sec  
D11 0.03000000 sec  
TD0 1

----- CHANNEL f1 -----  
SFO1 100.6278588 MHz  
NUC1 13C  
P1 10.00 usec  
PLW1 47.00000000 W

----- CHANNEL f2 -----  
SFO2 400.1516006 MHz  
NUC2 1H  
CPDPRG(2) waltz16  
PCPD2 90.00 usec  
PLW2 18.00000000 W  
PLW12 0.34722000 W  
PLW13 0.28125000 W

F2 - Processing parameters  
SI 32768  
SF 100.6177975 MHz  
WDW EM  
SSB 0  
LB 1.00 Hz  
GB 0  
PC 1.40

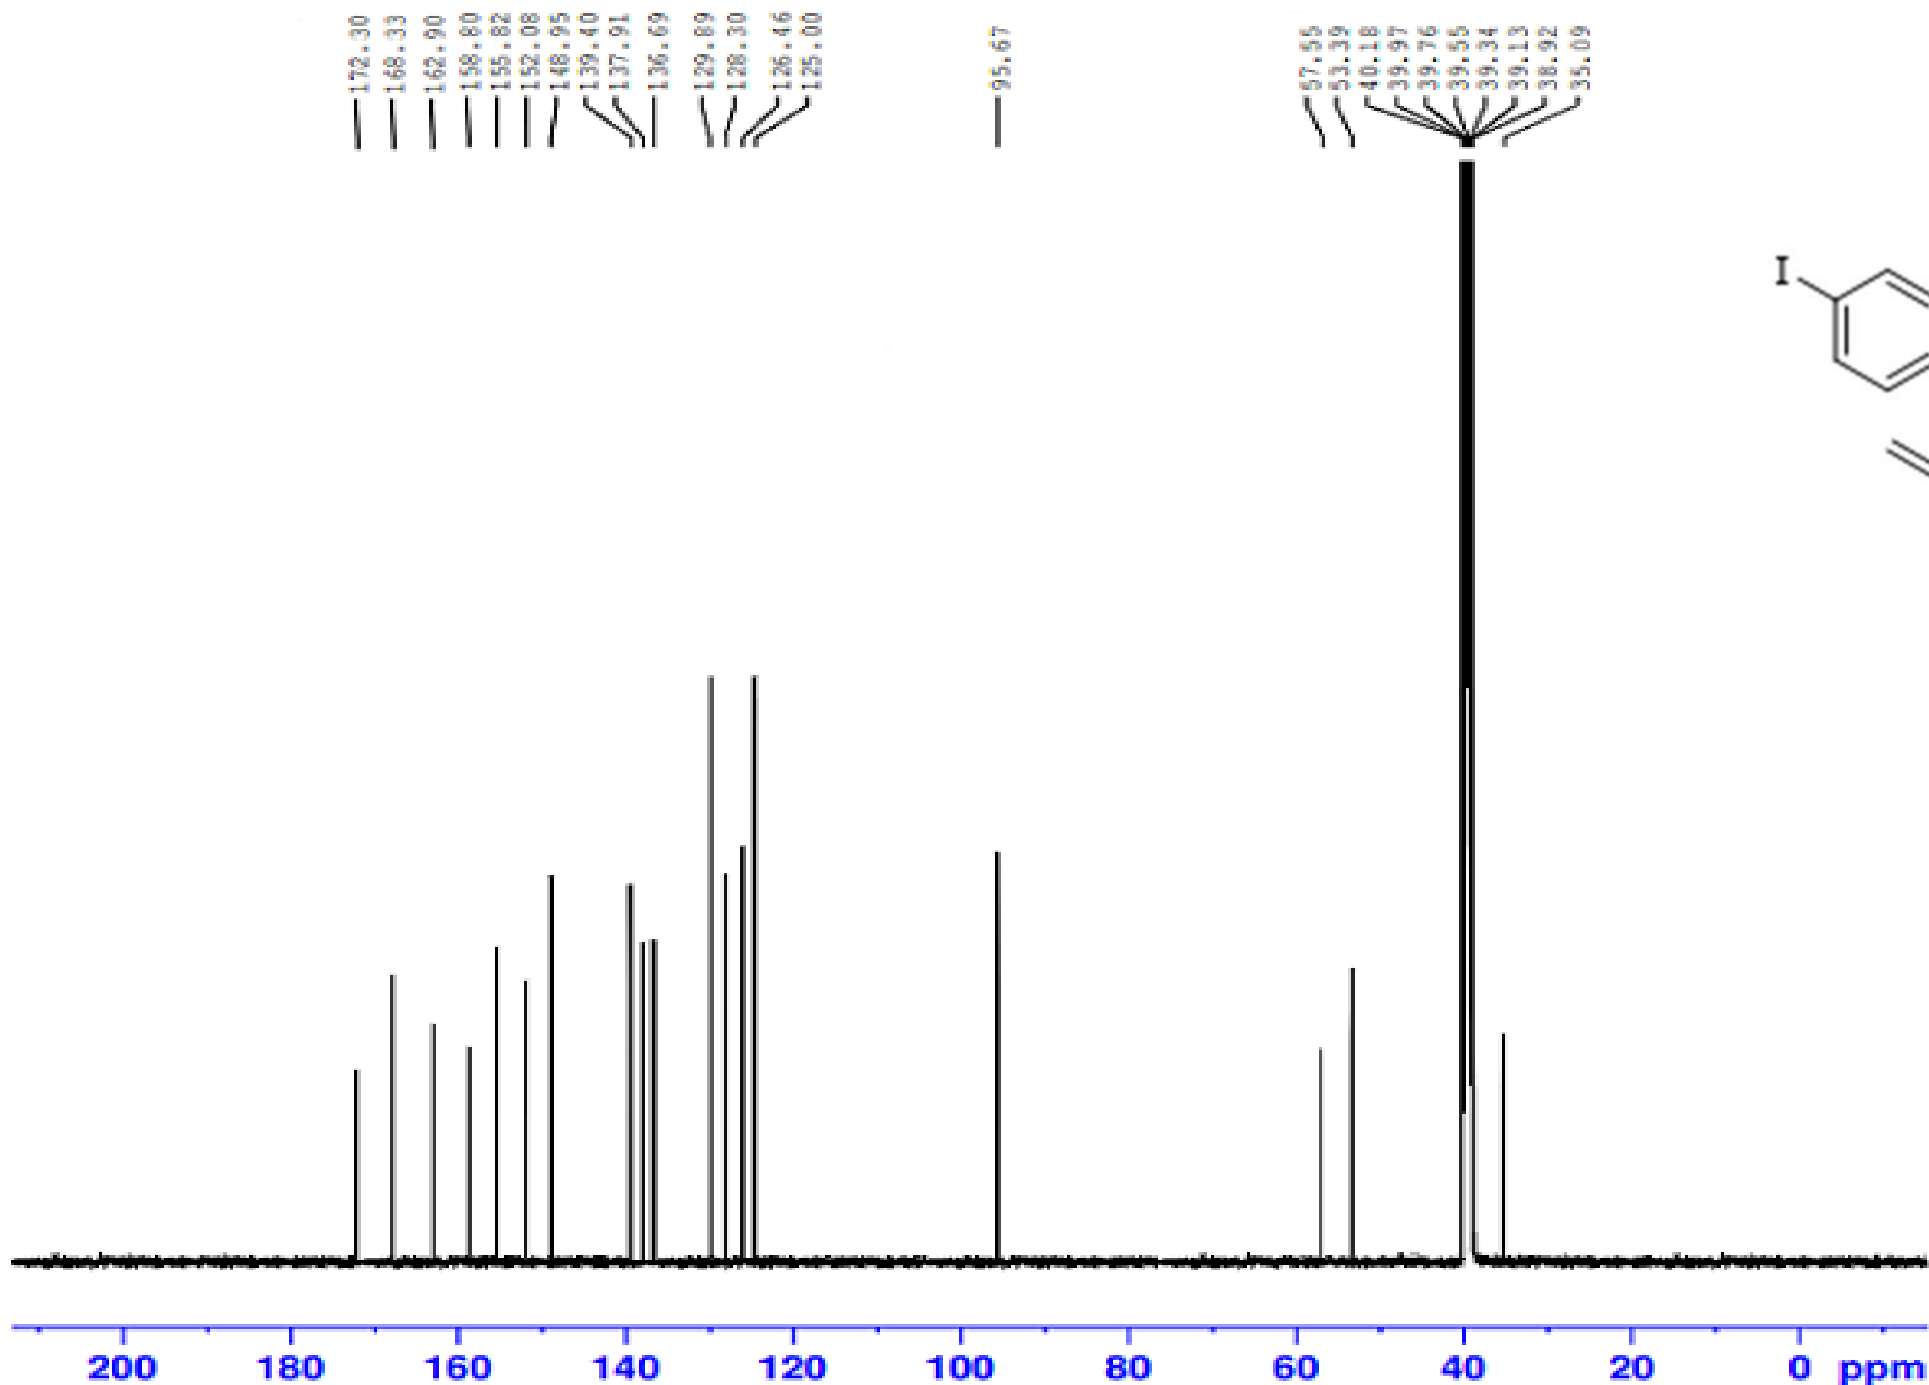

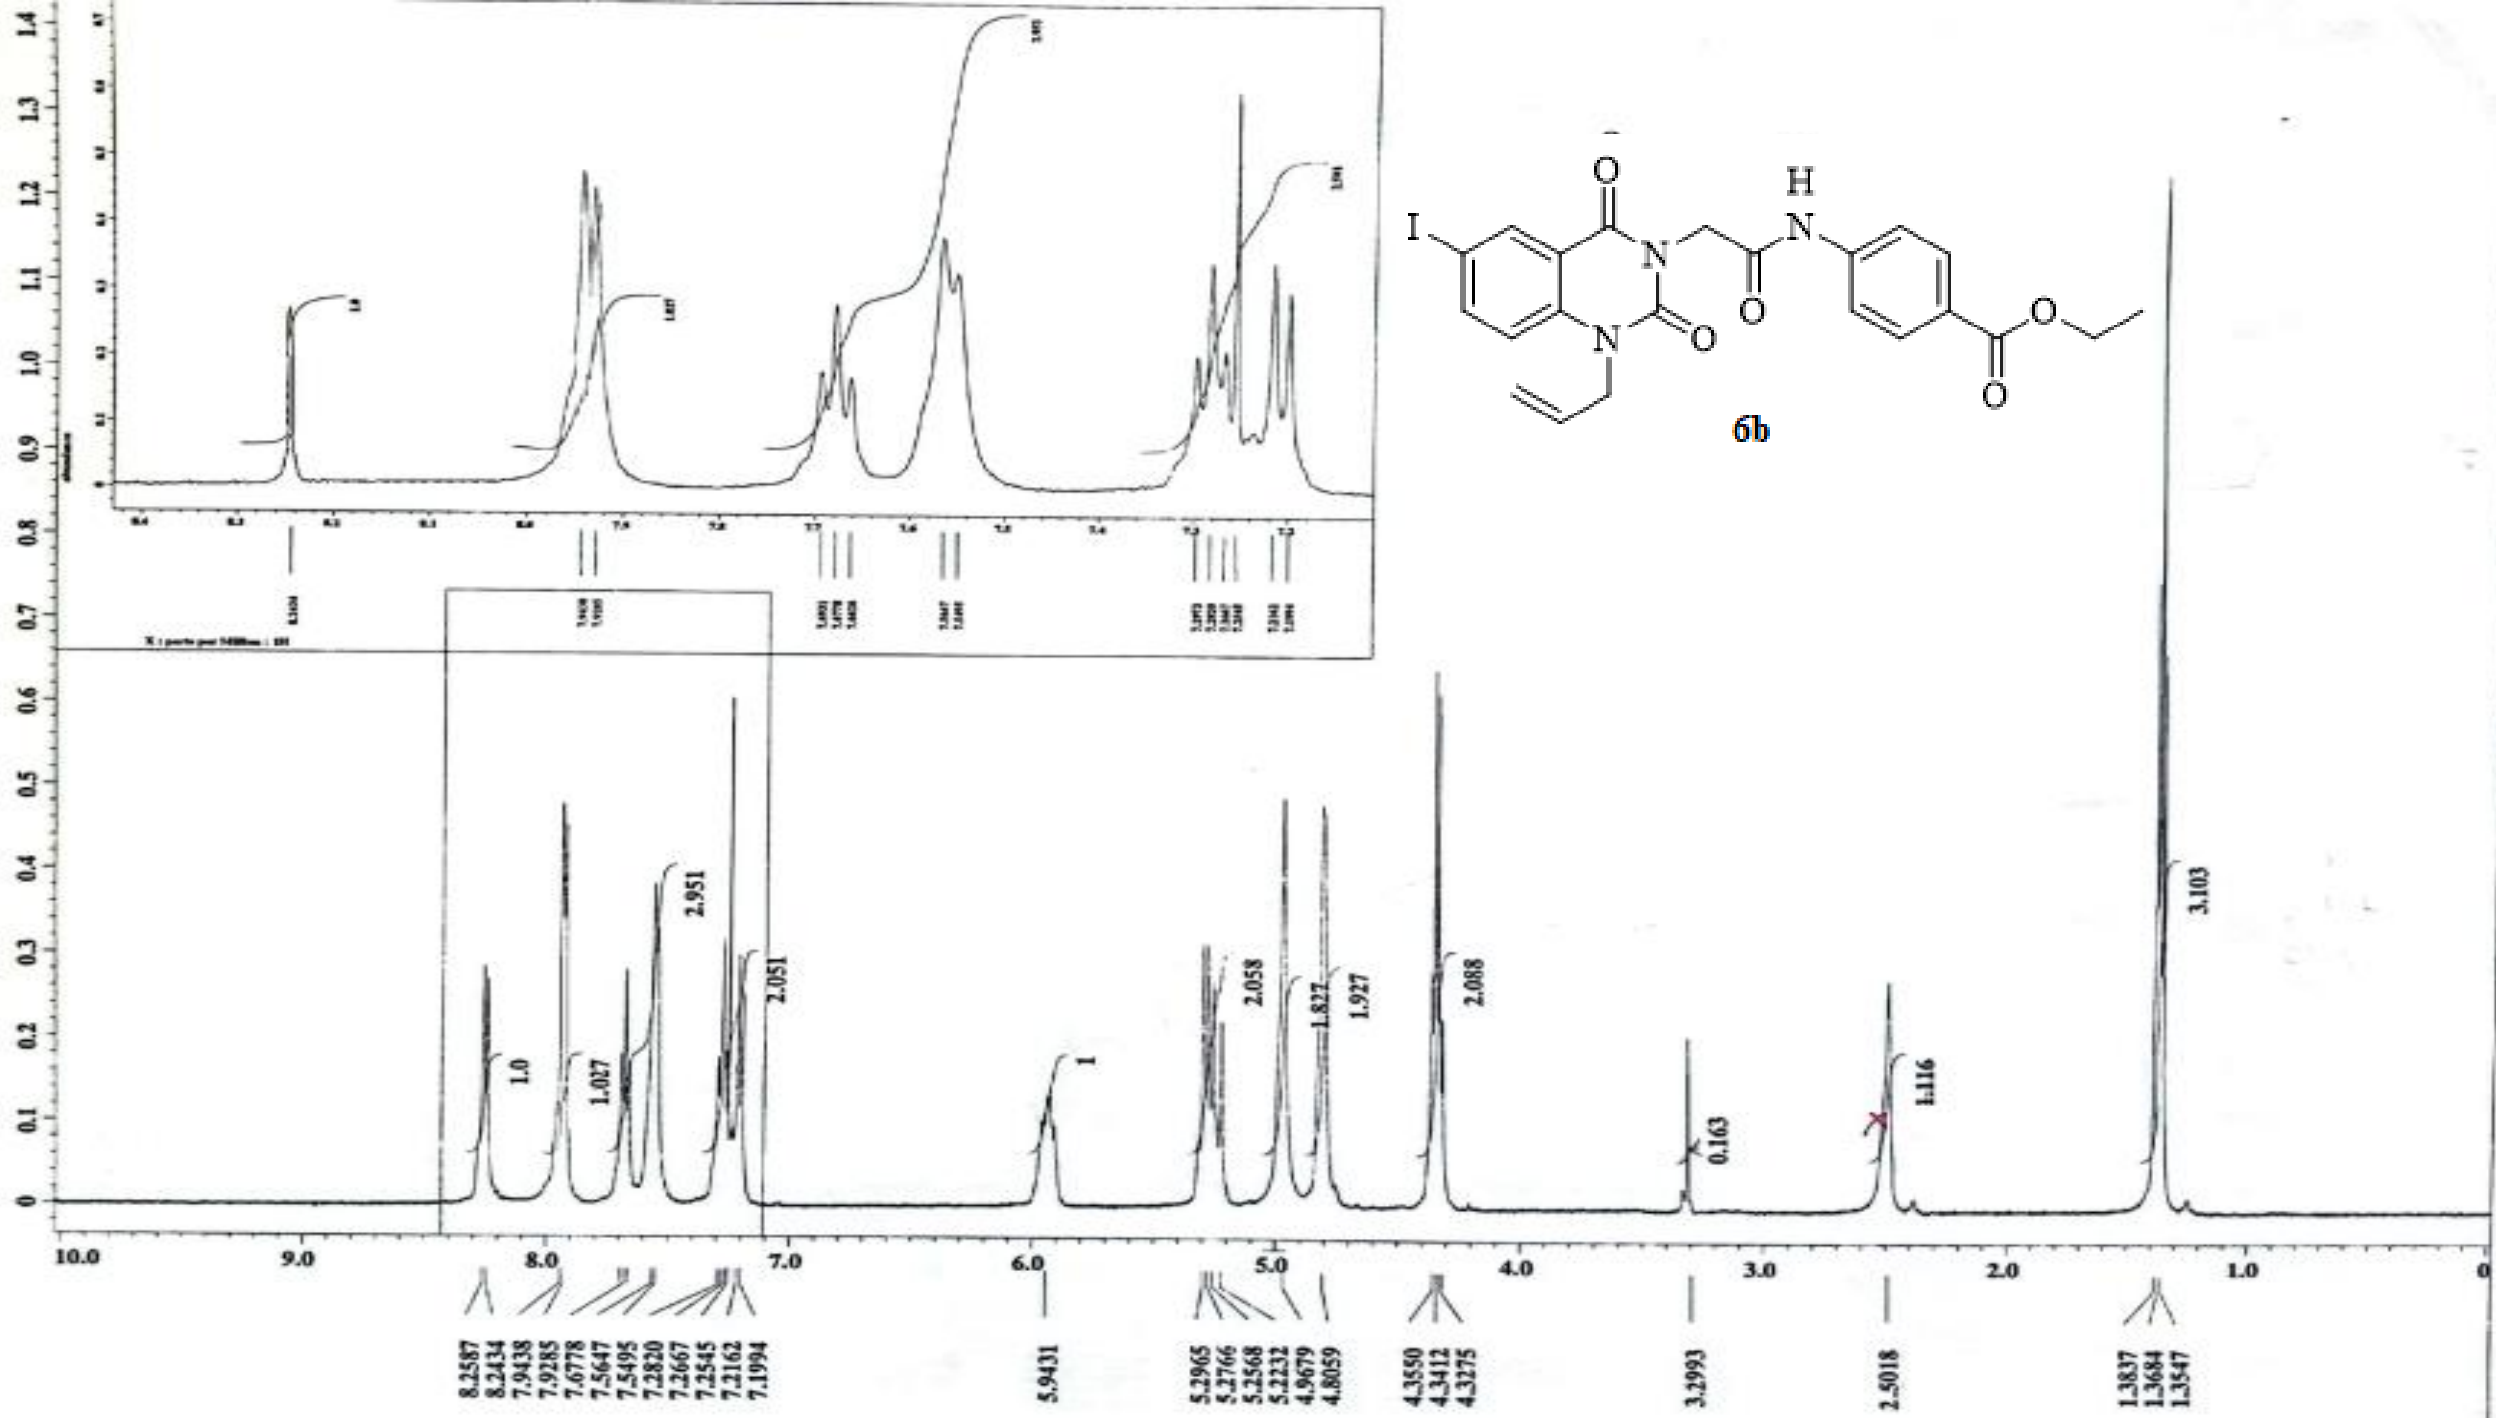

Author = delta3  
 Content = single\_pulse  
 Creation\_time = 30-JUL-2012 18:3  
 Current\_time = 30-JUL-2012 11:4  
 Data\_format = 1D\_COMPLEX

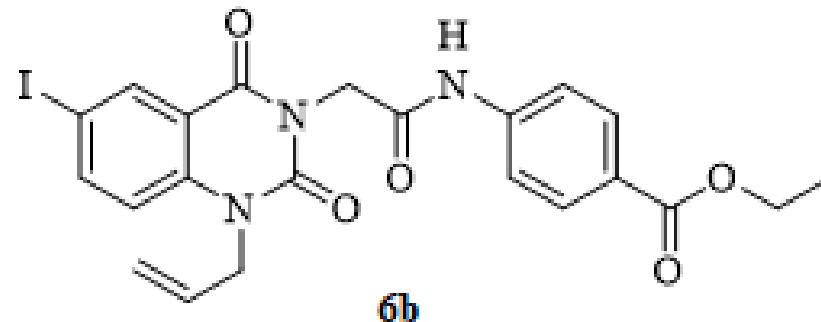

0.3

0.2

0.1

0

10.6446  
 2.089  
 8.0493  
 7.9010  
 7.8857  
 7.6778  
 7.6626  
 7.3890  
 7.3080  
 5.8743  
 5.1697  
 5.1483  
 5.1299  
 4.7875  
 4.7570  
 4.2572  
 4.2434  
 3.5357  
 3.3111  
 3.2912  
 2.4689  
 1.2905  
 1.2767

197.885

70.535

2.089

1.961

1.817

6.313

4.192

1

4.32

8.464

4.441

-0.966

6.549

Irr\_offset = 5.0[ppm]  
 Irr\_freq = 500.15991521[MHz]  
 Tri\_domain = 1H  
 Tri\_offset = 5.0[ppm]  
 Tri\_freq = 500.15991521[MHz]  
 X\_acq\_duration = 1.30809856[s]  
 Digital\_filter = TRUE  
 Filter\_factor = 8  
 Af\_version = 1  
 Delay\_of\_start = 1.99999974[s]  
 Acq\_delay = 9.82[us]  
 Digital\_filter\_status = 2P  
 Clipped = FALSE  
 Dc\_balanced = FALSE  
 X90 = 13.1[us]  
 Irr90 = 13.1[us]  
 Tri90 = 10[us]  
 Qua90 = 10[us]  
 Qui90 = 10[us]  
 Sex90 = 10[us]  
 Sep90 = 10[us]  
 Oct90 = 10[us]  
 Non90 = 10[us]  
 Dec90 = 10[us]  
 X90\_hi = 92[us]  
 Irr90\_hi = 92[us]  
 Tri90\_hi = 10[us]  
 Qua90\_hi = 10[us]  
 Qui90\_hi = 10[us]  
 Sex90\_hi = 10[us]  
 Sep90\_hi = 10[us]  
 Oct90\_hi = 10[us]  
 Non90\_hi = 10[us]  
 Dec90\_hi = 10[us]  
 X90\_lo = 92[us]  
 Irr90\_lo = 92[us]  
 Tri90\_lo = 10[us]  
 Qua90\_lo = 10[us]  
 Qui90\_lo = 10[us]  
 Sex90\_lo = 10[us]  
 Sep90\_lo = 10[us]  
 Oct90\_lo = 10[us]  
 Non90\_lo = 10[us]



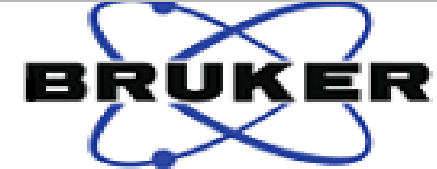

Current Data Parameters

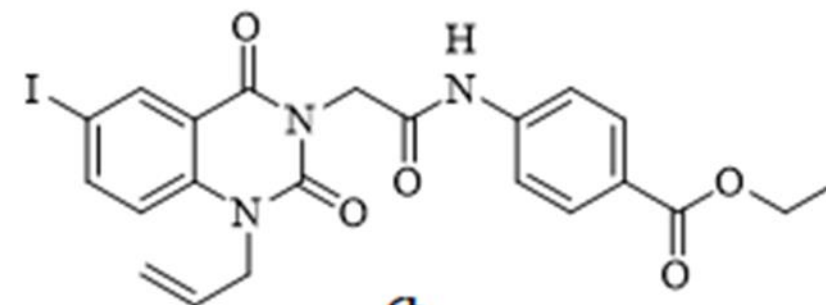

6b

```
-----  
AQ                1.3631488  sec  
RG                205.37  
DW                20.800  usec  
DE                6.50  usec  
TE                300.0  K  
D1                2.0000000  sec  
D11               0.0300000  sec  
TD0                1
```

```
----- CHANNEL f1 -----  
SFO1              100.6278588  MHz  
NUC1                13C  
P1                 10.00  usec  
PLW1               47.0000000  W
```

```
----- CHANNEL f2 -----  
SFO2              400.1516006  MHz  
NUC2                1H  
CPDPRG[2          waltz16  
PCPD2              90.00  usec  
PLW2               18.0000000  W  
PLW12              0.3472200  W  
PLW13              0.2812500  W
```

```
F2 - Processing parameters  
SI                 32768  
SF                 100.6177975  MHz  
NDW                EM  
SSB                0  
LB                 1.00  Hz  
GB                0  
PC                 1.40
```

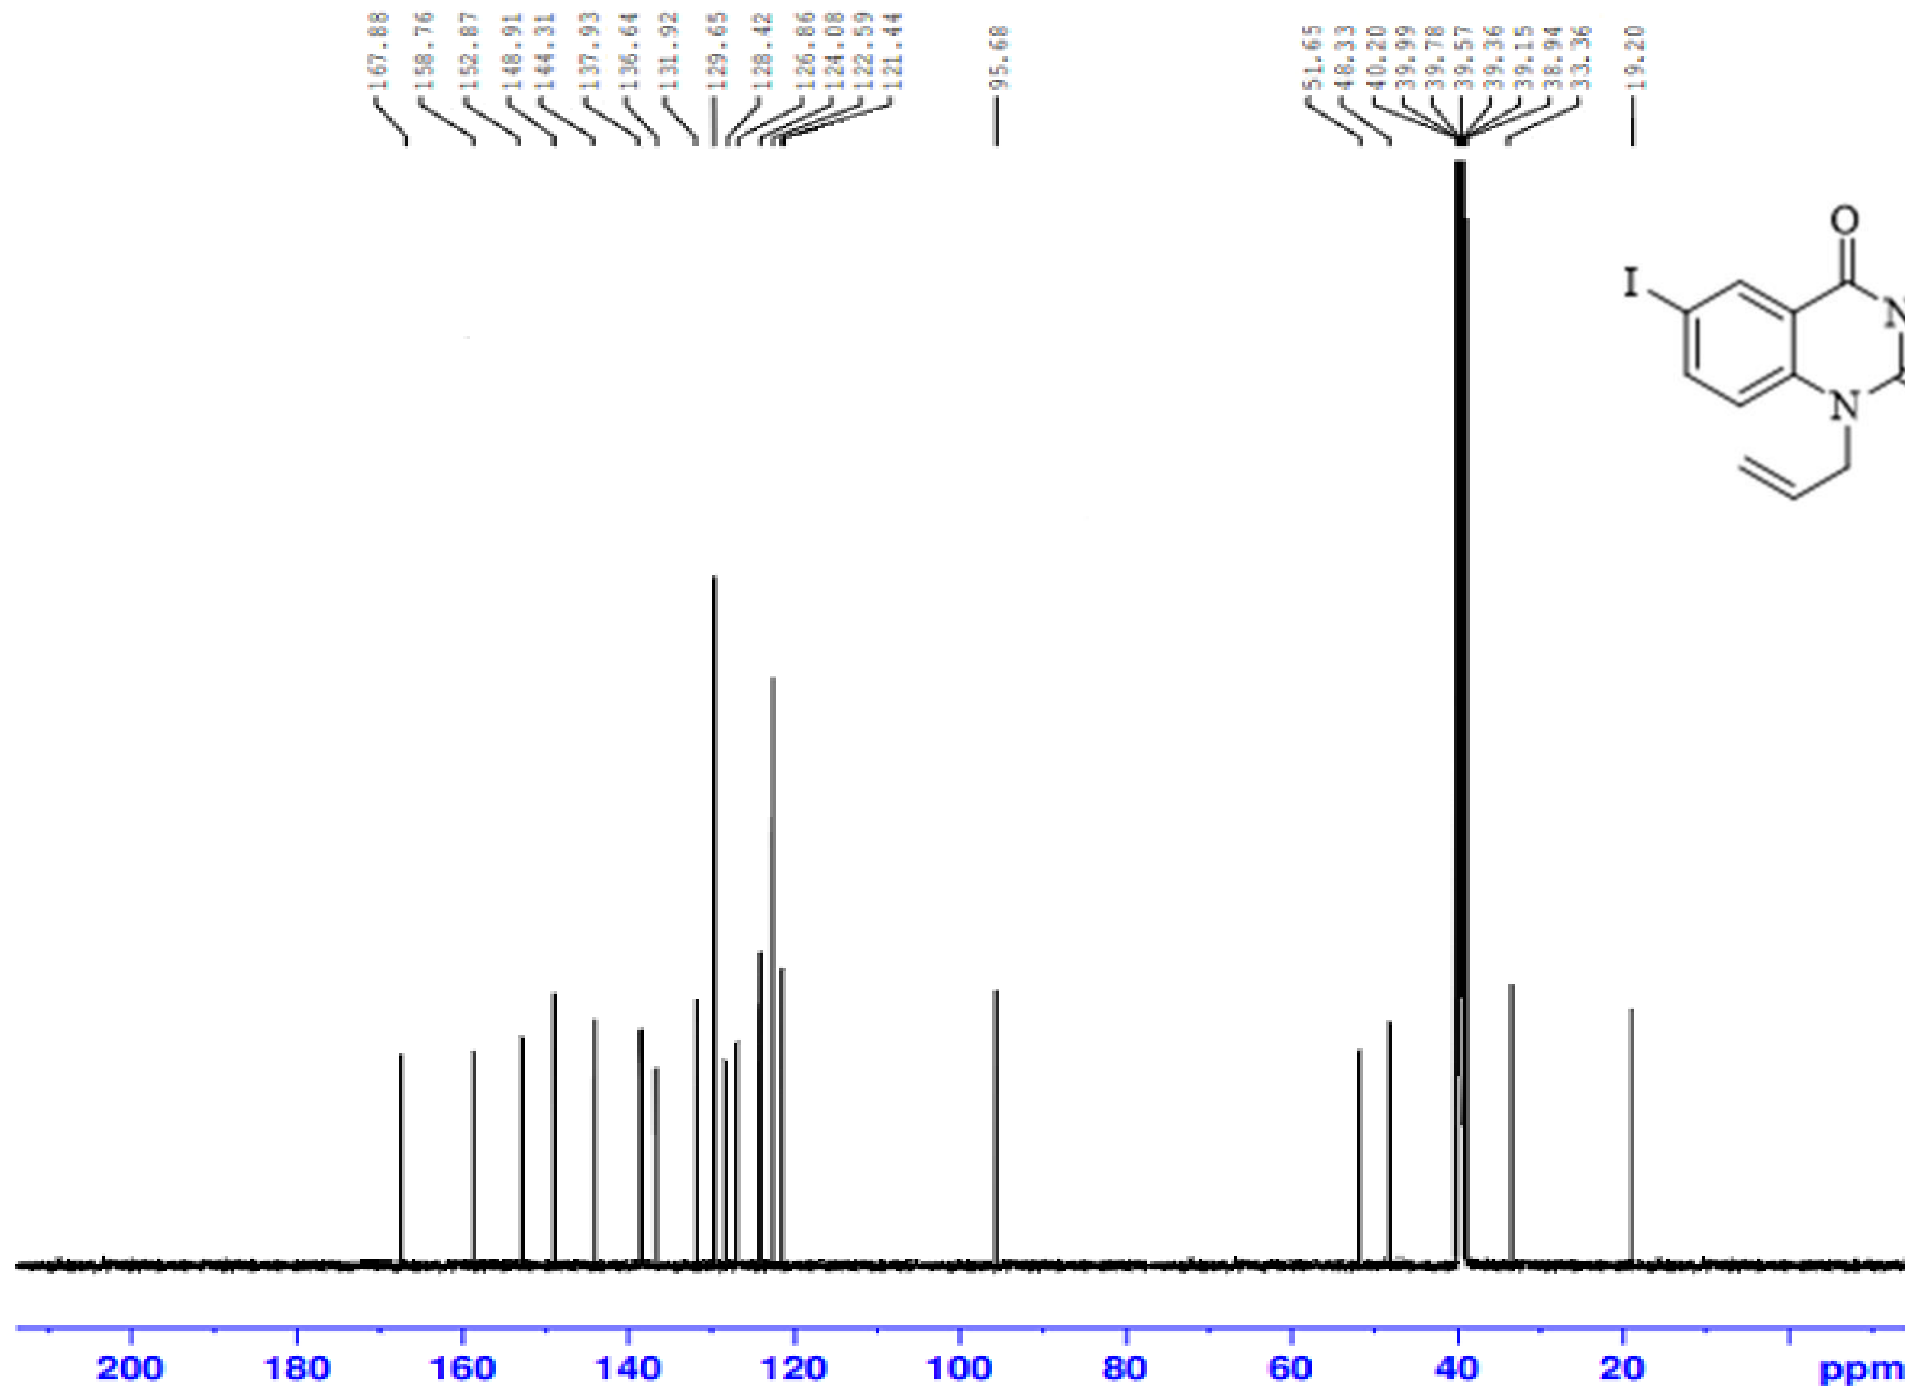

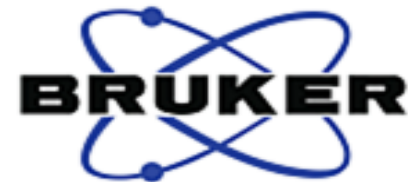

Current Data Parameters

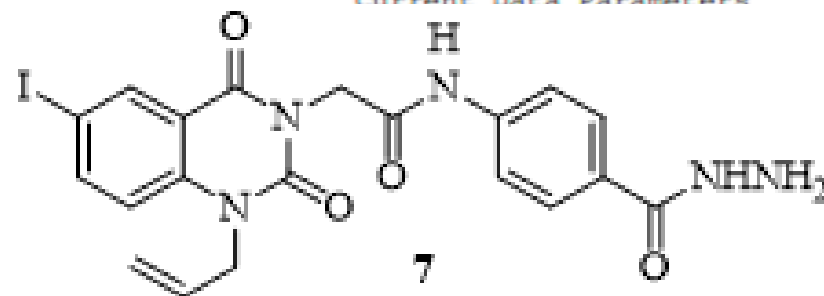

NS 814  
DS 4  
SWH 24038.461 Hz  
FIDRES 0.366798 Hz  
AQ 1.3631488 sec  
RG 205.37  
DW 20.800 usec  
DE 6.50 usec  
TE 300.0 K  
D1 2.00000000 sec  
D11 0.03000000 sec  
TD0 1

----- CHANNEL f1 -----  
SFO1 100.6278588 MHz  
NUC1 13C  
P1 10.00 usec  
PLW1 47.00000000 W

----- CHANNEL f2 -----  
SFO2 400.1516006 MHz  
NUC2 1H  
CPDPRG[2] waltz16  
PCPD2 90.00 usec  
PLW2 18.00000000 W  
PLW12 0.34722000 W  
PLW13 0.28125000 W

F2 - Processing parameters  
SI 32768  
SF 100.6177975 MHz  
WDW EM  
SSB 0  
LB 1.00 Hz  
GB 0  
PC 1.40

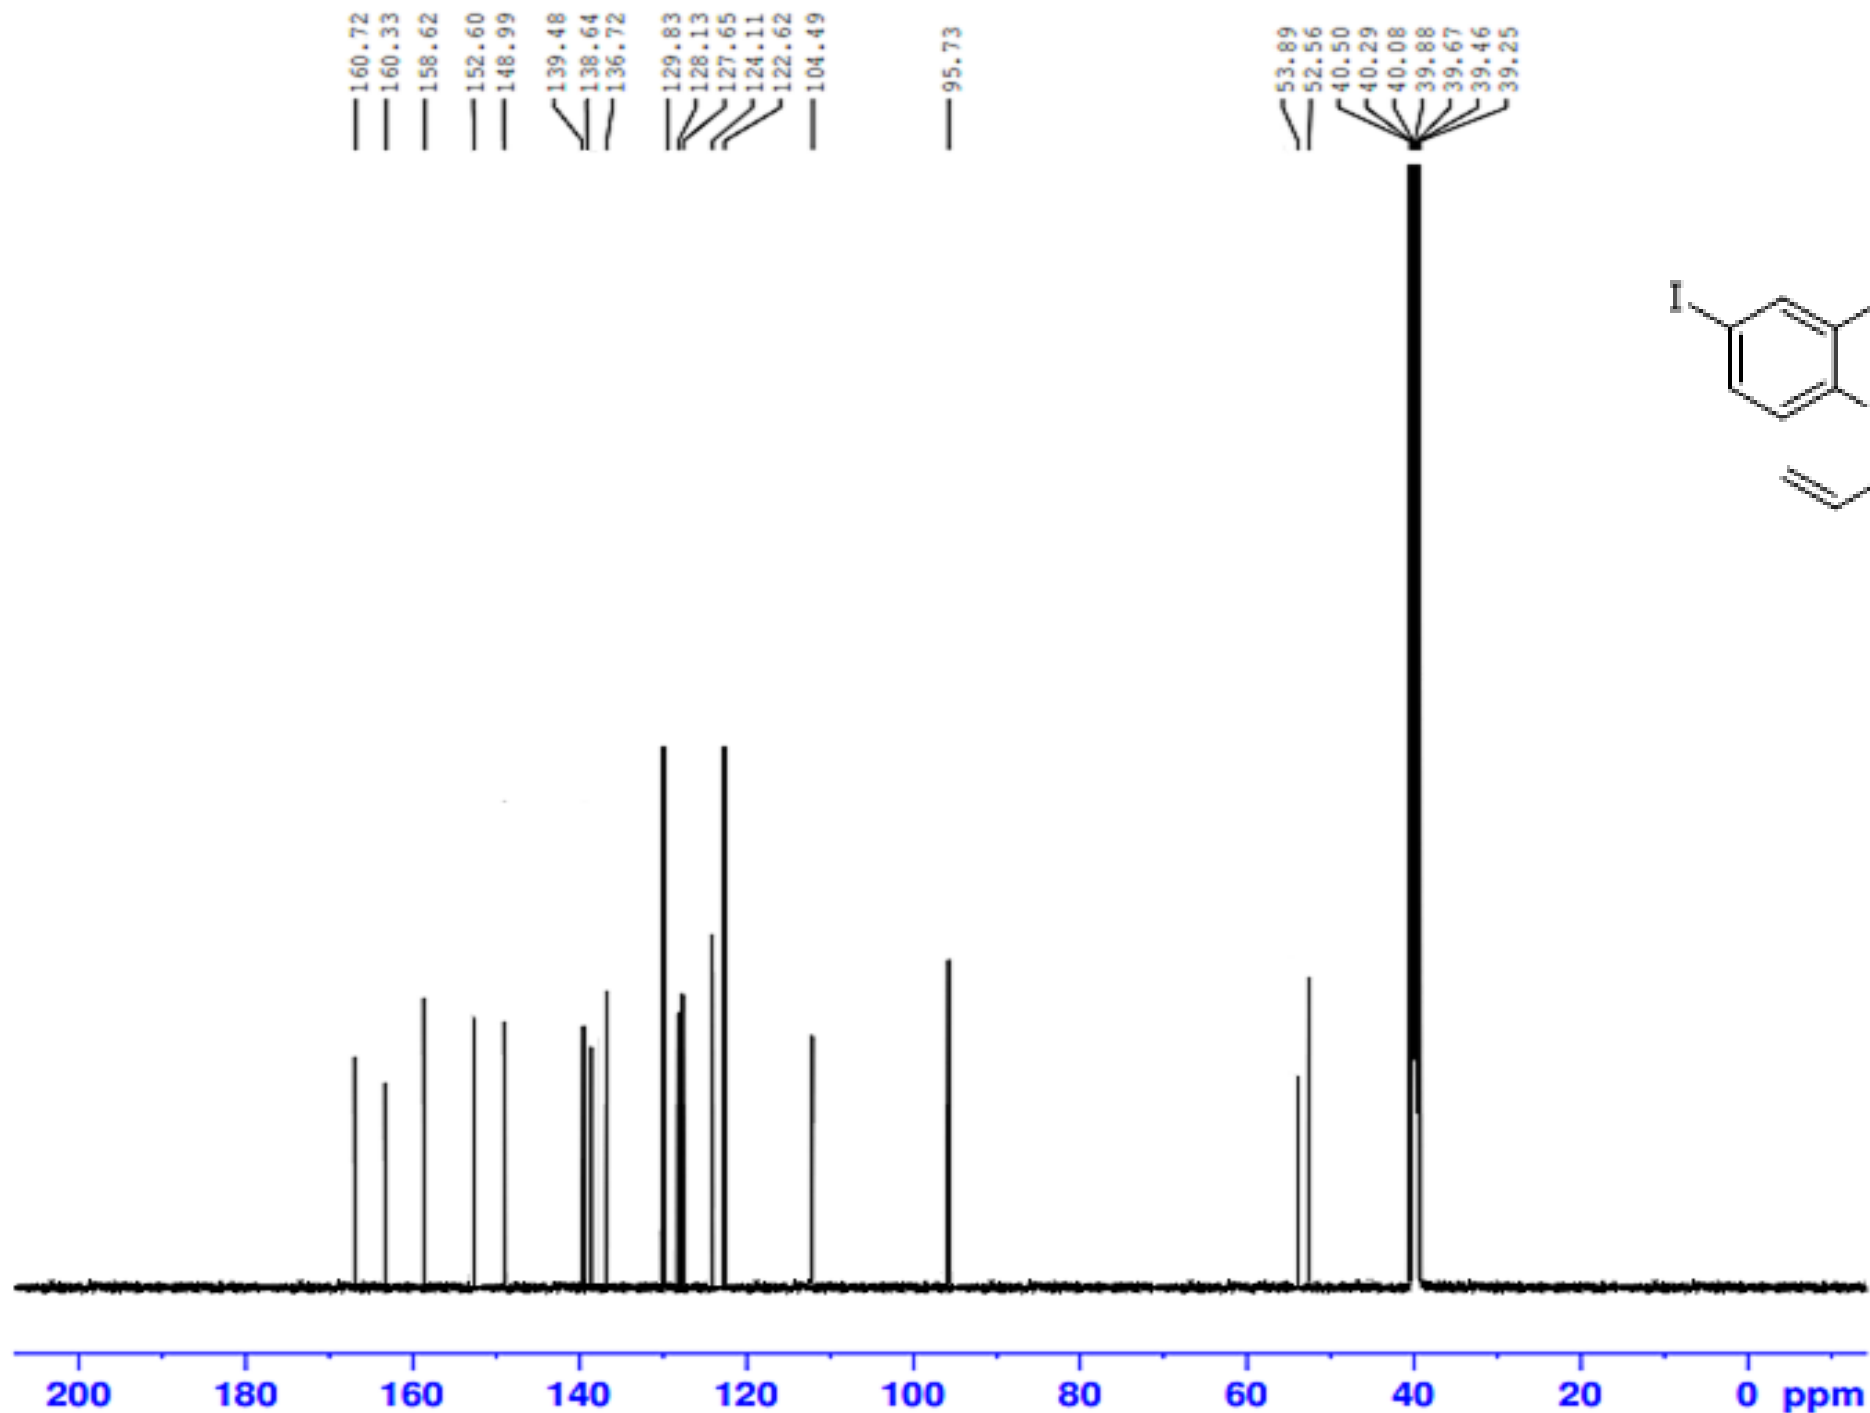

Relax. delay 1.000 sec  
 Pulse 74.1 degrees  
 Acq. time 4.004 sec  
 Width 8000.0 Hz  
 11 repetitions  
 OBSERVE H1, 300.0687875 MHz  
 DATA PROCESSING  
 FT size 65536  
 Total time 19 min, 19 sec

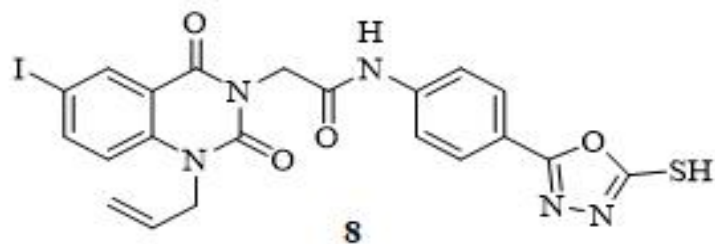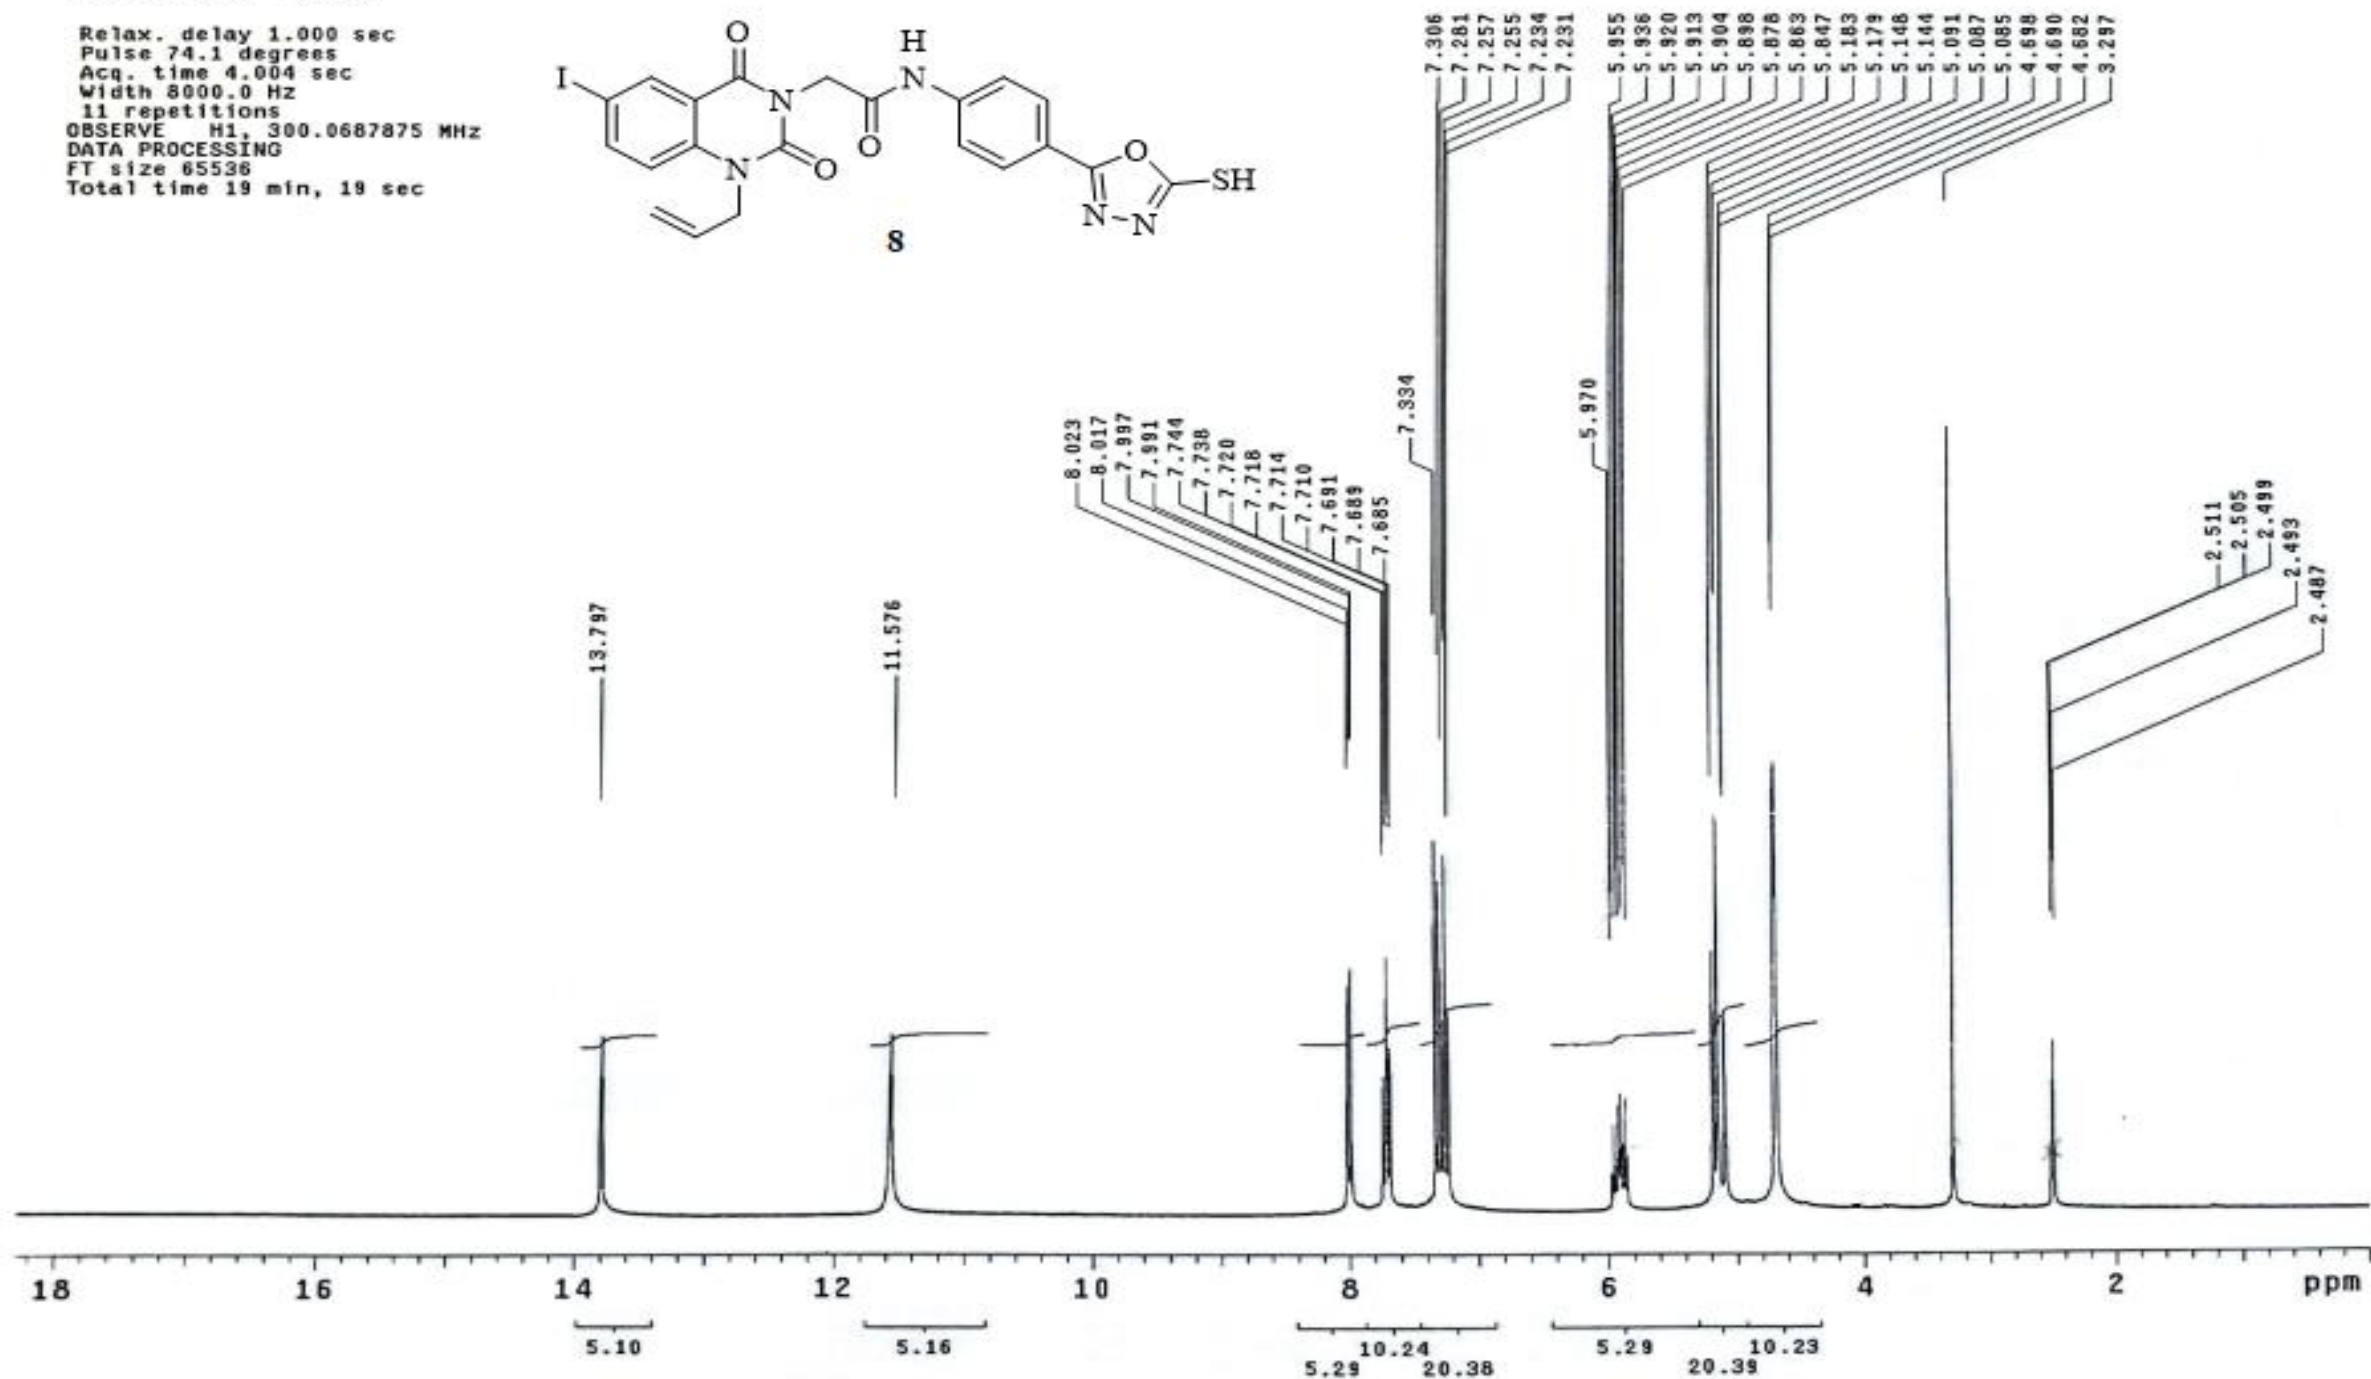

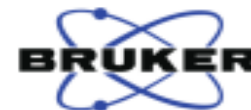

167.68  
 167.33  
 165.38  
 158.89  
 154.98  
 148.74  
 142.94  
 134.64  
 133.19  
 131.43  
 130.74  
 125.61  
 120.99  
 116.56  
 112.35  
 94.37  
 53.16  
 51.54  
 40.59  
 40.39  
 40.18  
 39.97  
 39.76  
 39.55  
 39.34

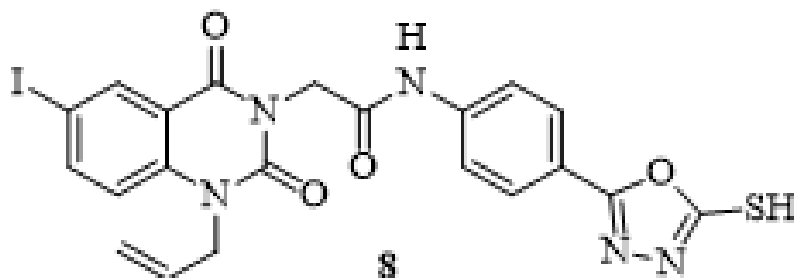

SWH 24038.461 Hz  
 FIDRES 0.366798 Hz  
 AQ 1.3631488 sec  
 RG 202.37  
 DW 20.800 usec  
 DE 6.50 usec  
 TE 298.1 K  
 D1 2.00000000 sec  
 D11 0.03000000 sec  
 TD0 1

----- CHANNEL f1 -----  
 SFO1 100.6379178 MHz  
 NUC1 13C  
 P1 10.00 usec  
 PLW1 45.00000000 W

----- CHANNEL f2 -----  
 SFO2 400.1916008 MHz  
 NUC2 1H  
 CPDPRG[2 waltz16

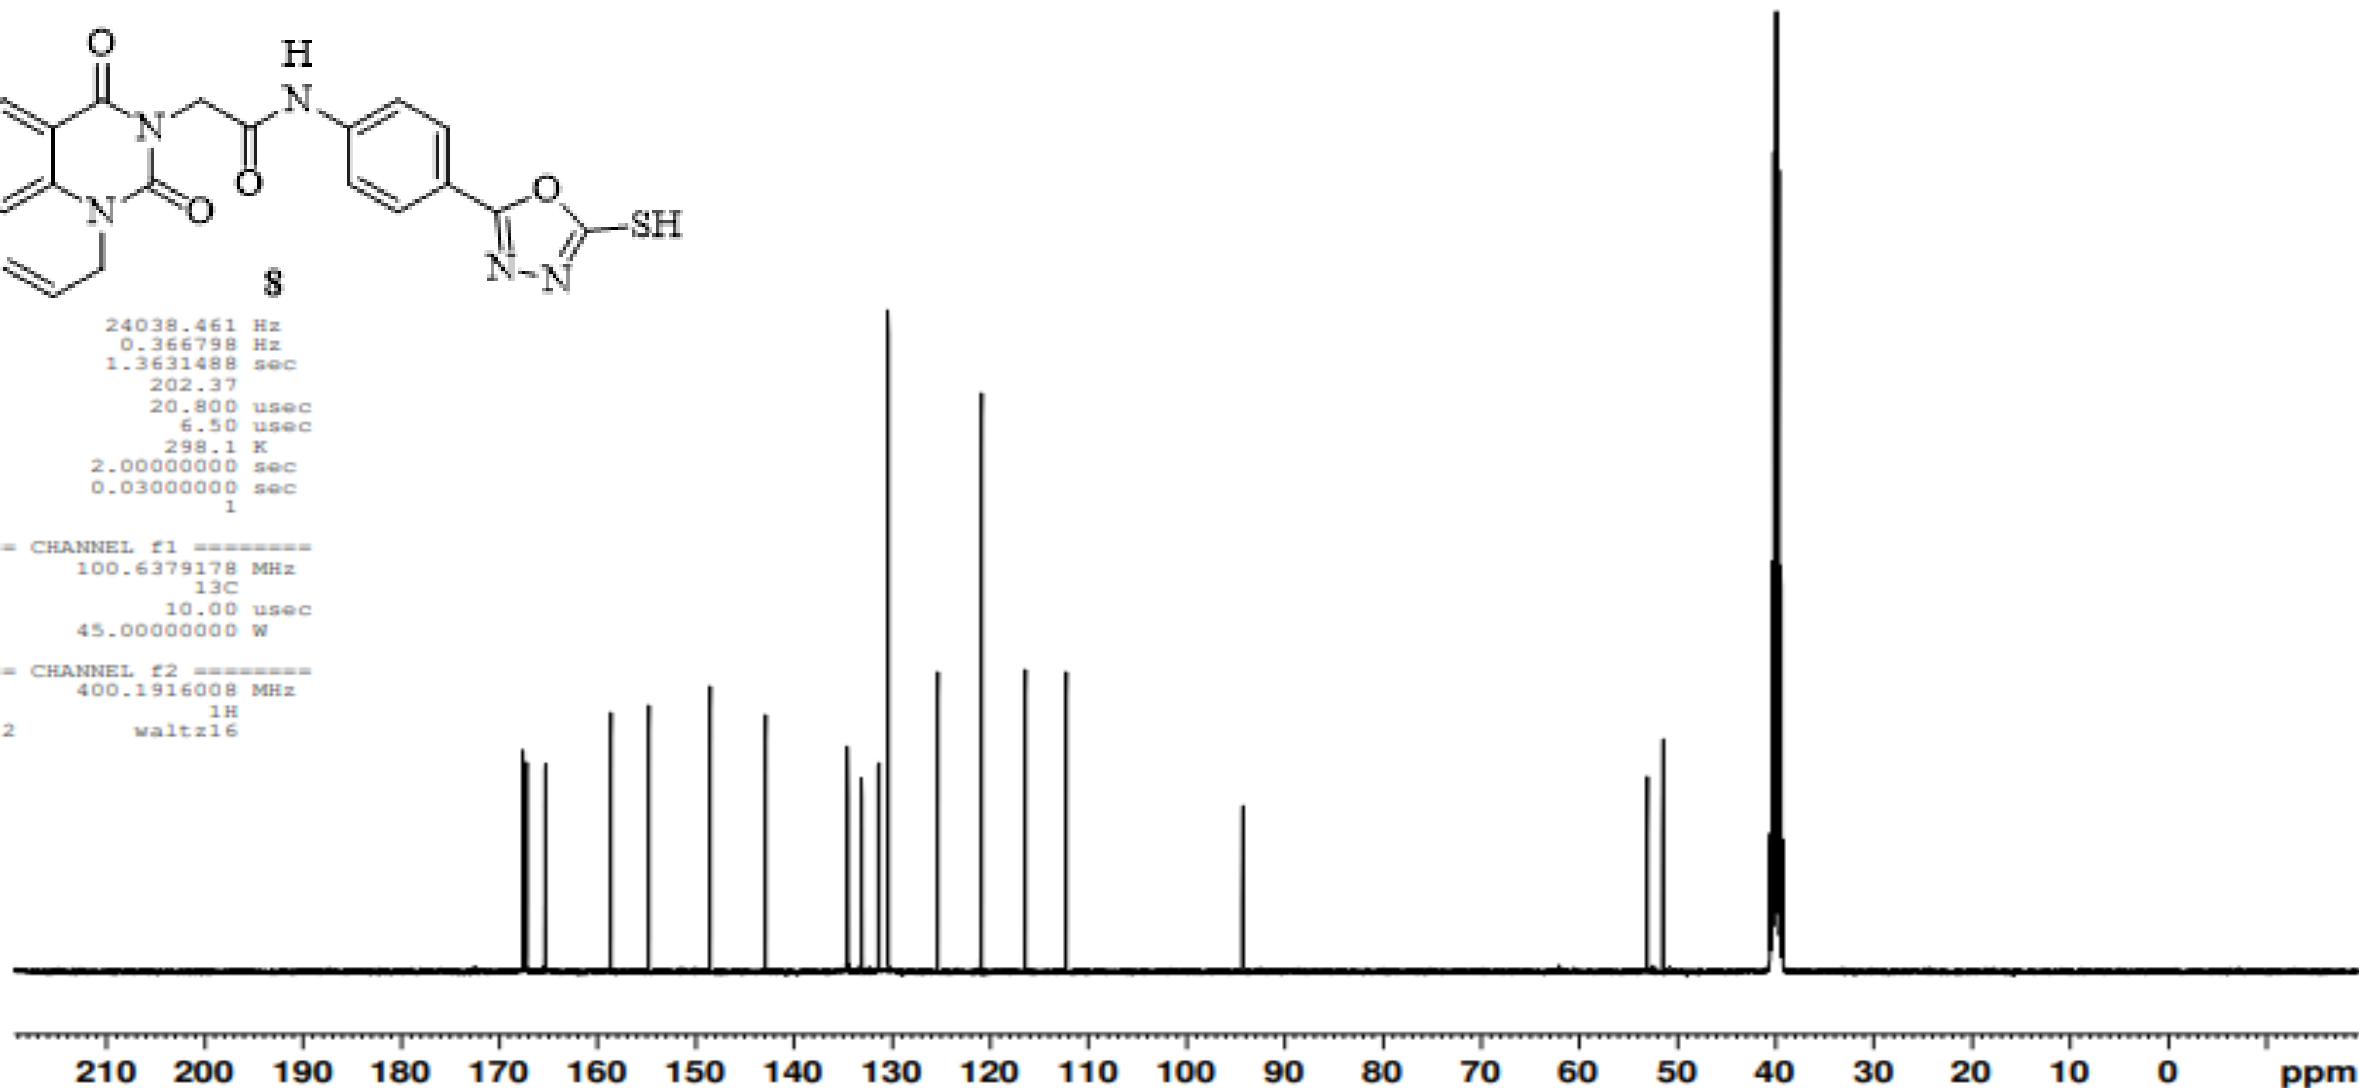

Author = delta3  
 Content = single\_pulse  
 Creation\_time = 29-JUL-2012 18:4  
 Current\_time = 29-JUL-2012 12:3  
 Data\_format = 1D COMPLEX  
 Dir\_size = 13107  
 Dir\_title = 1H  
 Dir\_units = [ppm]  
 Dimensions = X  
 Filename = DR\_ABDALGHANY\_AL  
 Machine = SCC

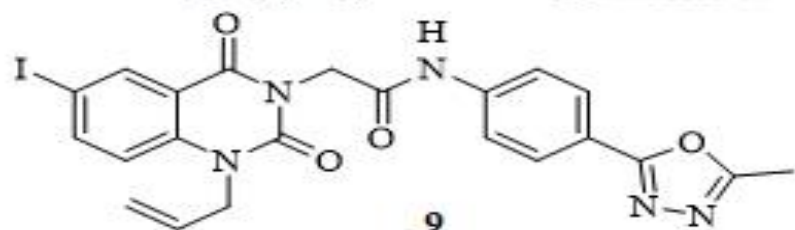

X\_resolution = 0.75446839 [Hz]  
 Irr\_domain = 1H  
 Irr\_offset = 5.0 [ppm]  
 Irr\_freq = 500.15991521 [MHz]  
 Tri\_domain = 1H  
 Tri\_offset = 5.0 [ppm]  
 Tri\_freq = 500.15991521 [MHz]  
 X\_acq\_duration = 1.30809856 [s]  
 Digital\_filter = TRUE  
 Filter\_factor = 8  
 Af\_version = 1  
 Delay\_of\_start = 1.99999974 [s]  
 Acq\_delay = 9.82 [us]  
 Digital\_filter\_status = 2P  
 Clipped = FALSE  
 Dc\_balanced = FALSE  
 X90 = 13.1 [us]  
 Irr90 = 13.1 [us]  
 Tri90 = 10 [us]  
 Qua90 = 10 [us]  
 Qui90 = 10 [us]  
 Sex90 = 10 [us]  
 Sep90 = 10 [us]  
 Oct90 = 10 [us]  
 Non90 = 10 [us]  
 Dec90 = 10 [us]  
 X90\_hi = 92 [us]  
 Irr90\_hi = 92 [us]  
 Tri90\_hi = 10 [us]  
 Qua90\_hi = 10 [us]  
 Qui90\_hi = 10 [us]  
 Sex90\_hi = 10 [us]  
 Sep90\_hi = 10 [us]  
 Oct90\_hi = 10 [us]  
 Non90\_hi = 10 [us]  
 Dec90\_hi = 10 [us]  
 X90\_lo = 92 [us]  
 Irr90\_lo = 92 [us]  
 Tri90\_lo = 10 [us]  
 Qua90\_lo = 10 [us]  
 Qui90\_lo = 10 [us]  
 Sex90\_lo = 10 [us]  
 Sep90\_lo = 10 [us]  
 Oct90\_lo = 10 [us]  
 Non90\_lo = 10 [us]

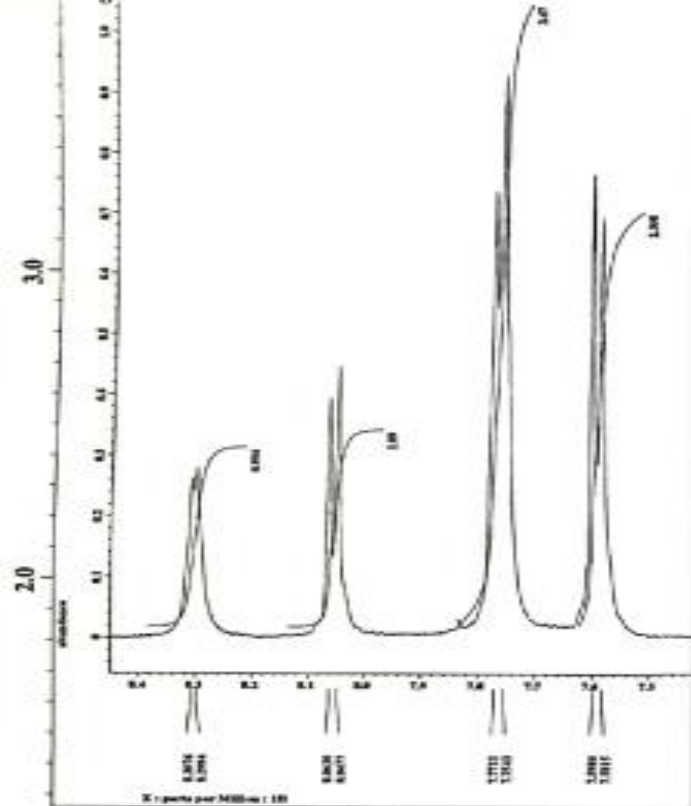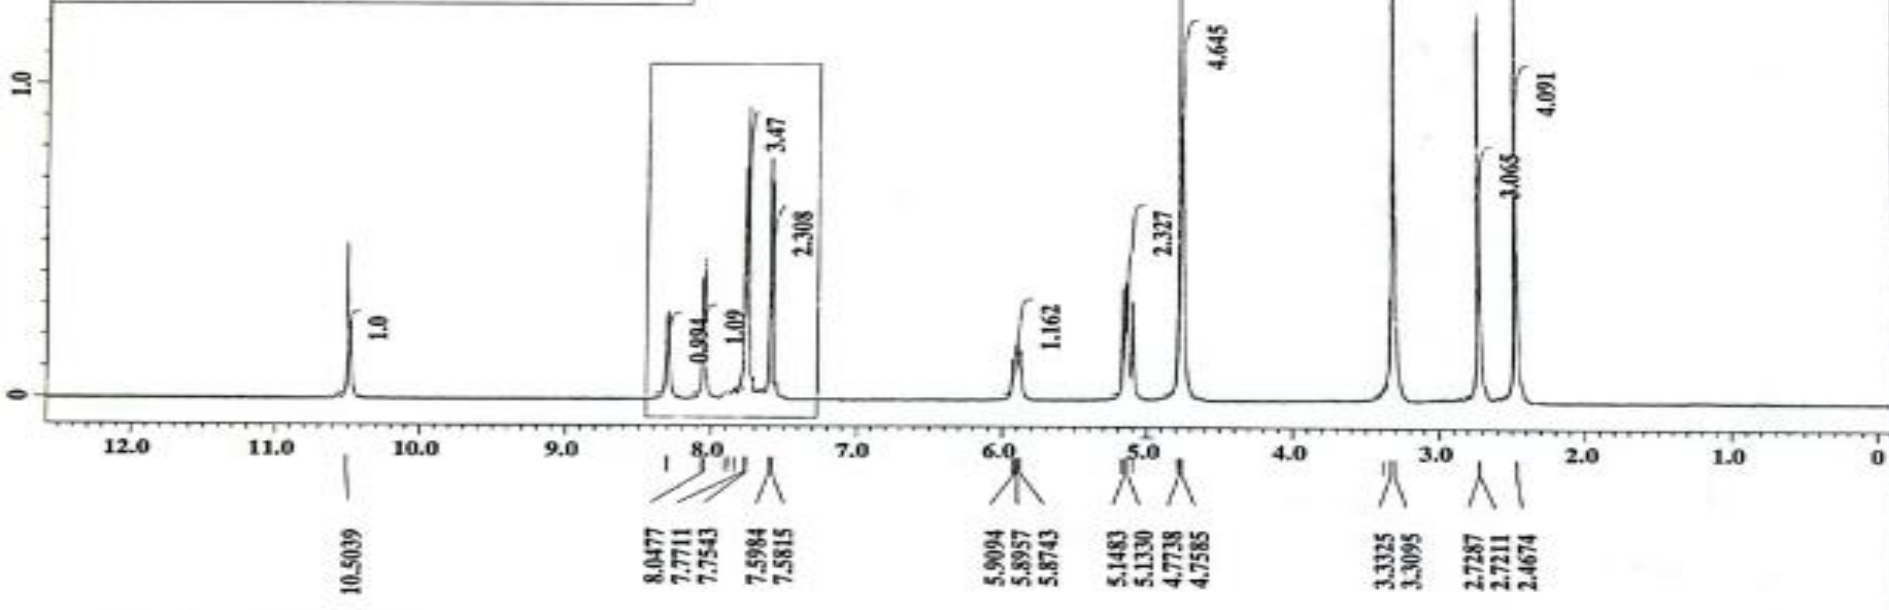

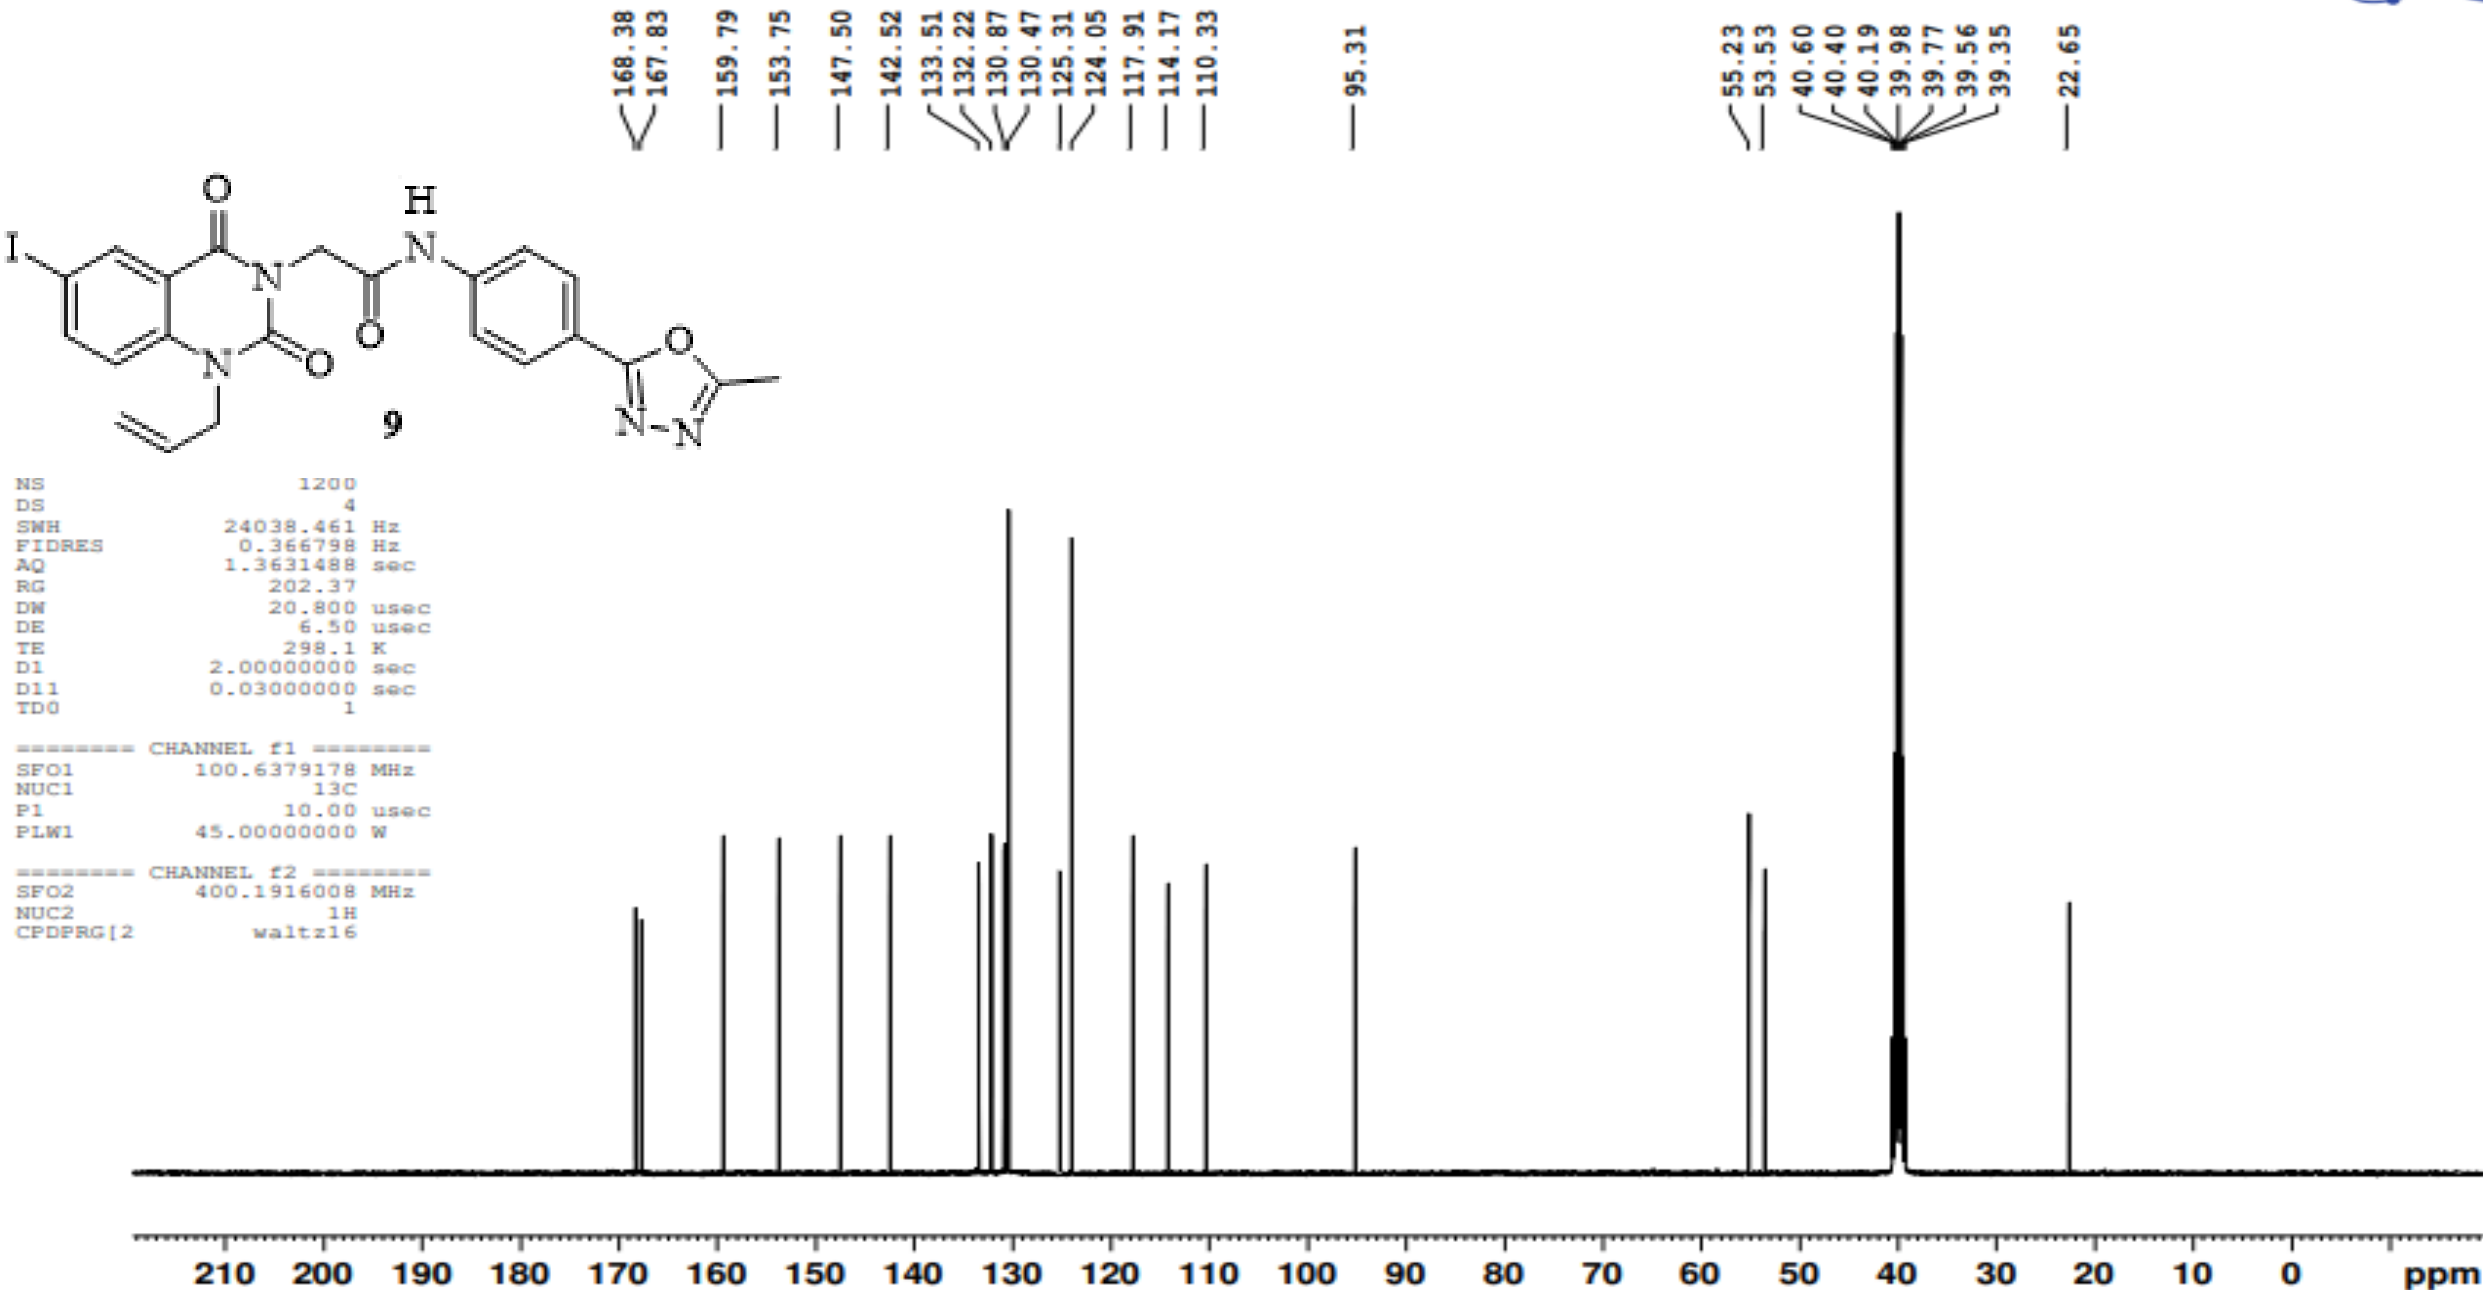

Temp. 30.0 C / 303.1 K  
Mercury-300BB "NMR300"

Relax. delay 1.000 sec  
Pulse 74.1 degrees  
Acq. time 4.004 sec  
Width 8000.0 Hz  
35 repetitions  
OBSERVE H1, 300.0687875 |  
DATA PROCESSING  
FT size 65536  
Total time 19 min, 19 sec

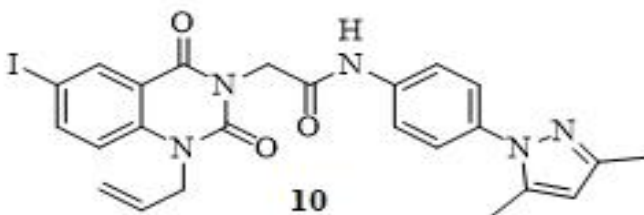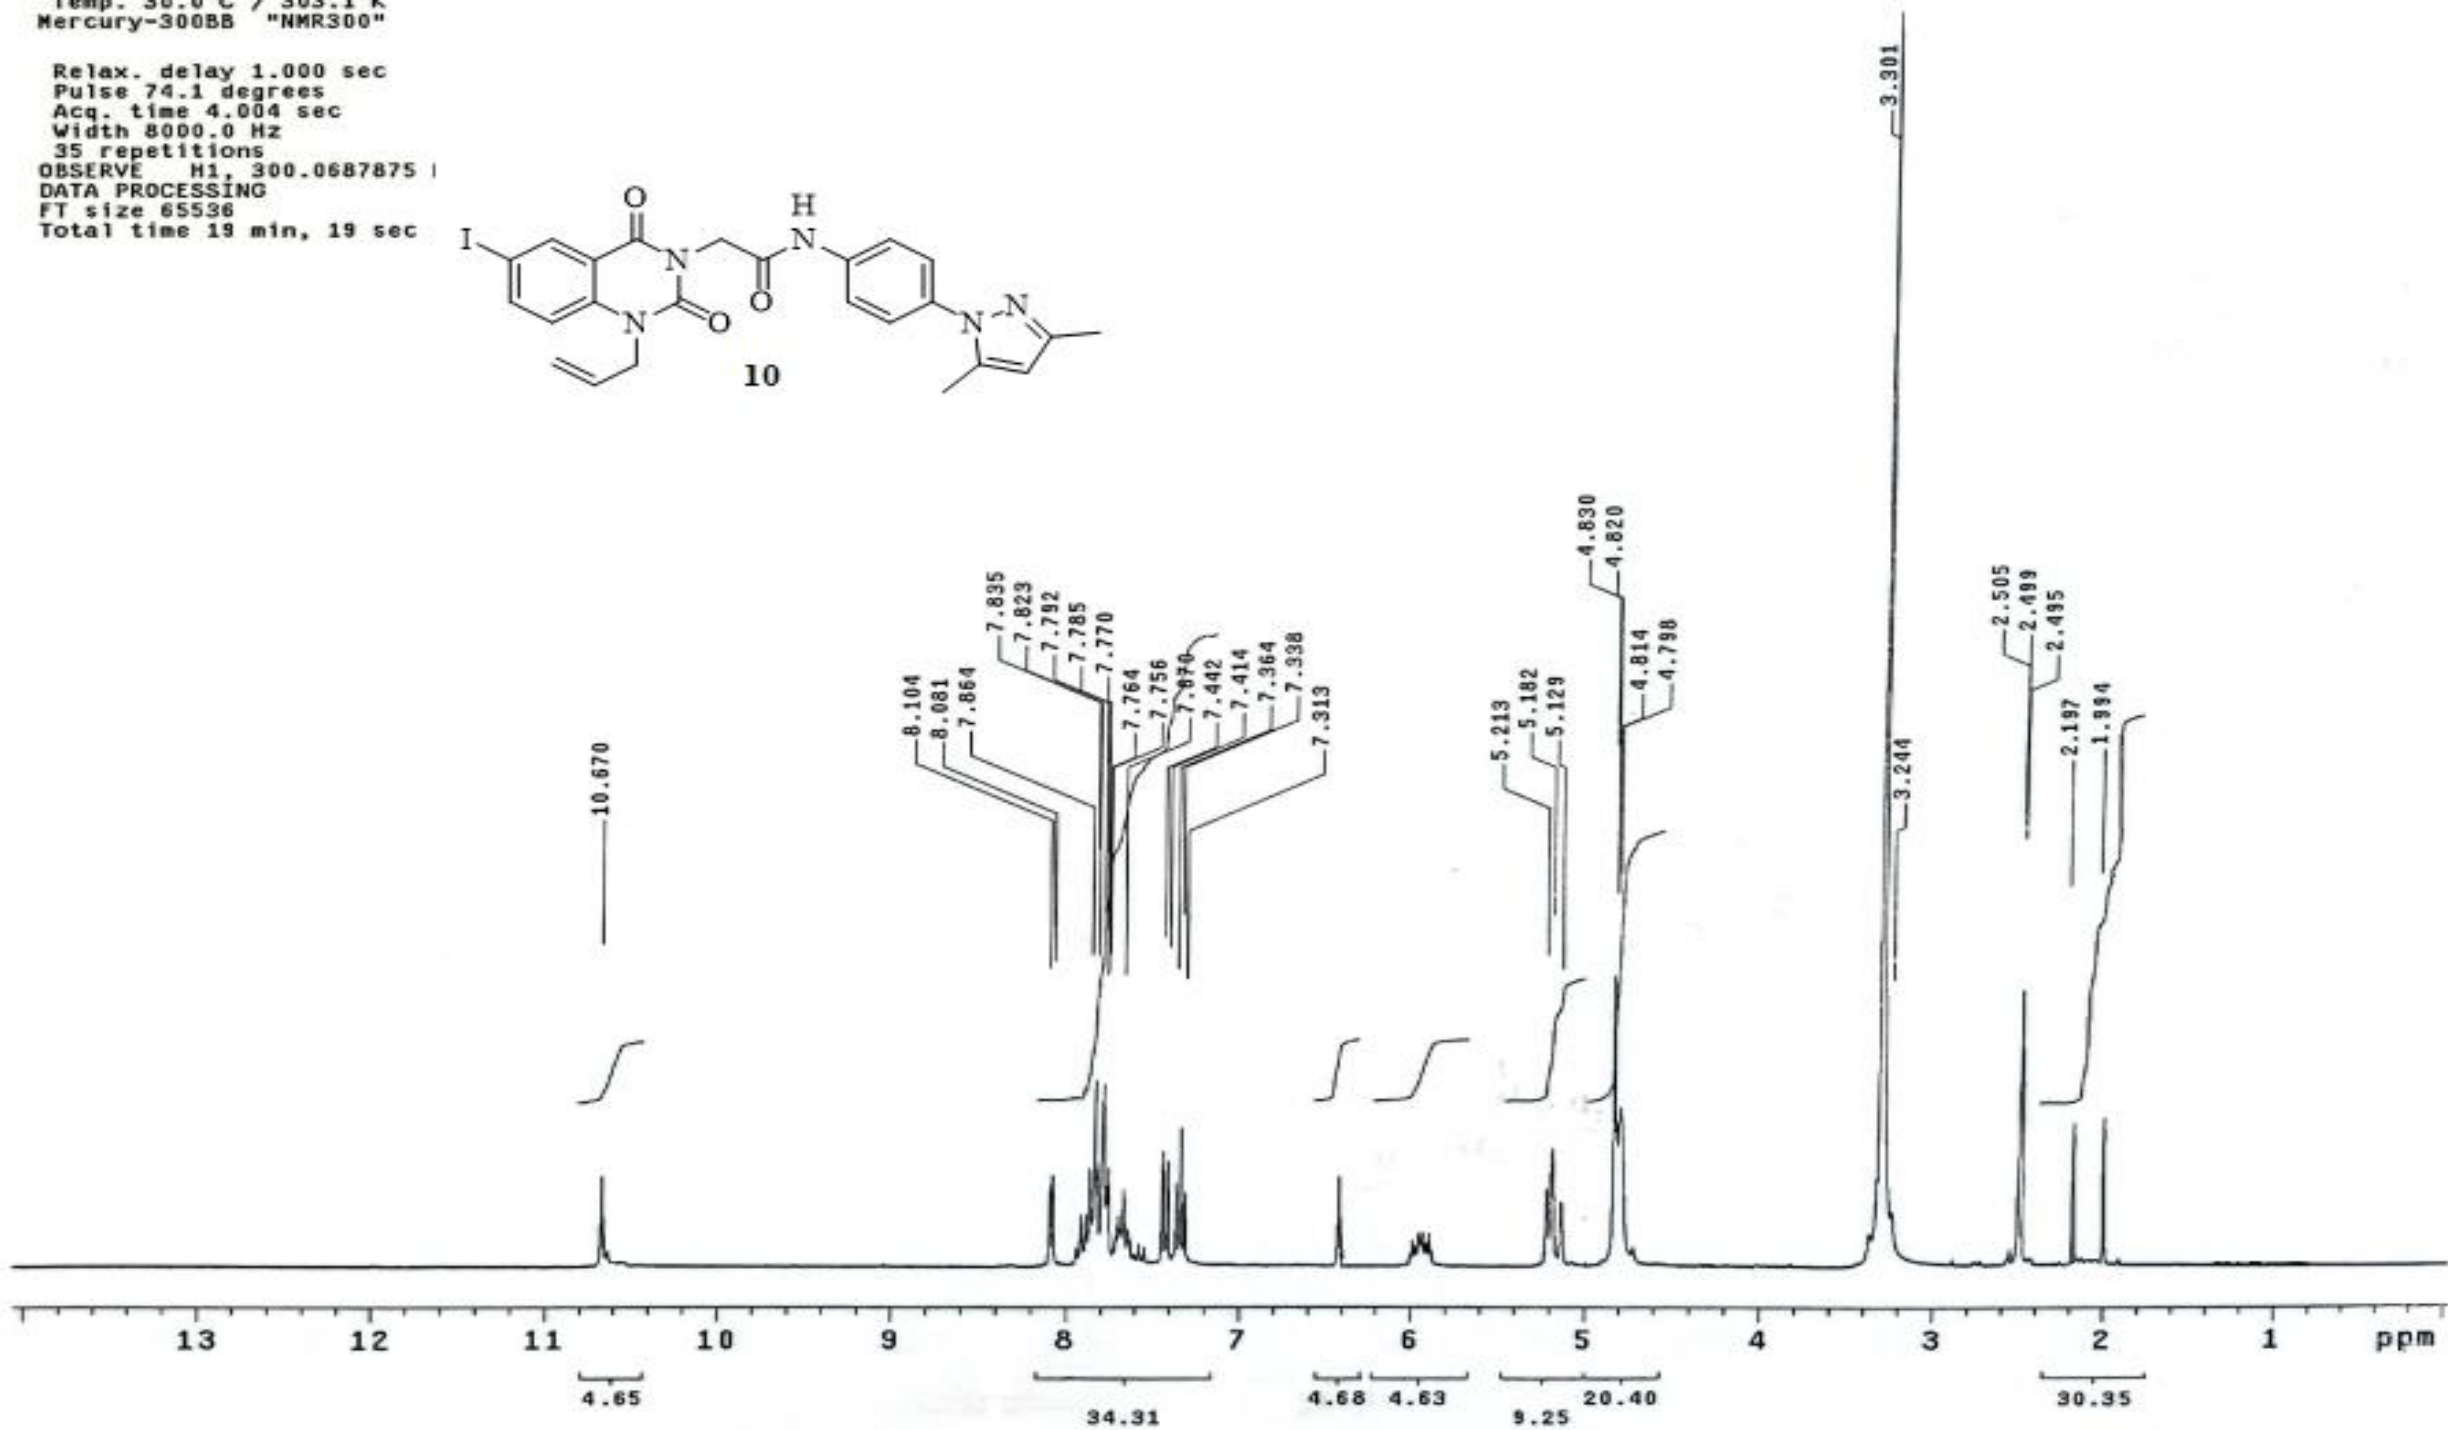

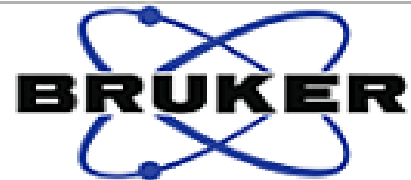

Current Data Parameters

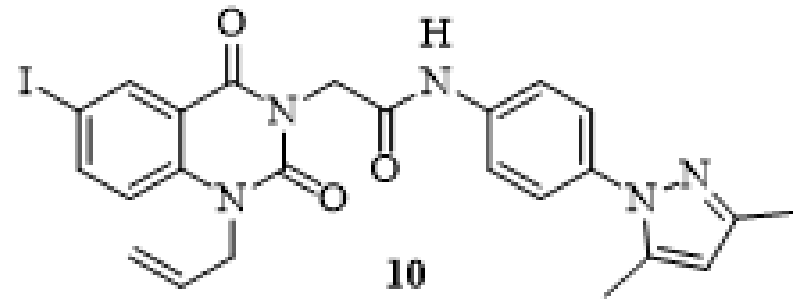

DS 4  
SWH 24038.461 Hz  
FIDRES 0.366798 Hz  
AQ 1.3631488 sec  
RG 205.37  
DW 20.800 usec  
DE 6.50 usec  
TE 300.0 K  
D1 2.00000000 sec  
D11 0.03000000 sec  
TD0 1

----- CHANNEL f1 -----  
SFO1 100.6278588 MHz  
NUC1 13C  
P1 10.00 usec  
PLW1 47.00000000 W

----- CHANNEL f2 -----  
SFO2 400.1516006 MHz  
NUC2 1H  
CPDPRG[2] waltz16  
PCPD2 90.00 usec  
PLW2 18.00000000 W  
PLW12 0.34722000 W  
PLW13 0.28125000 W

F2 - Processing parameters  
SI 32768  
SF 100.6177975 MHz  
WDW EM  
SSB 0  
LB 1.00 Hz  
GB 0  
PC 1.40

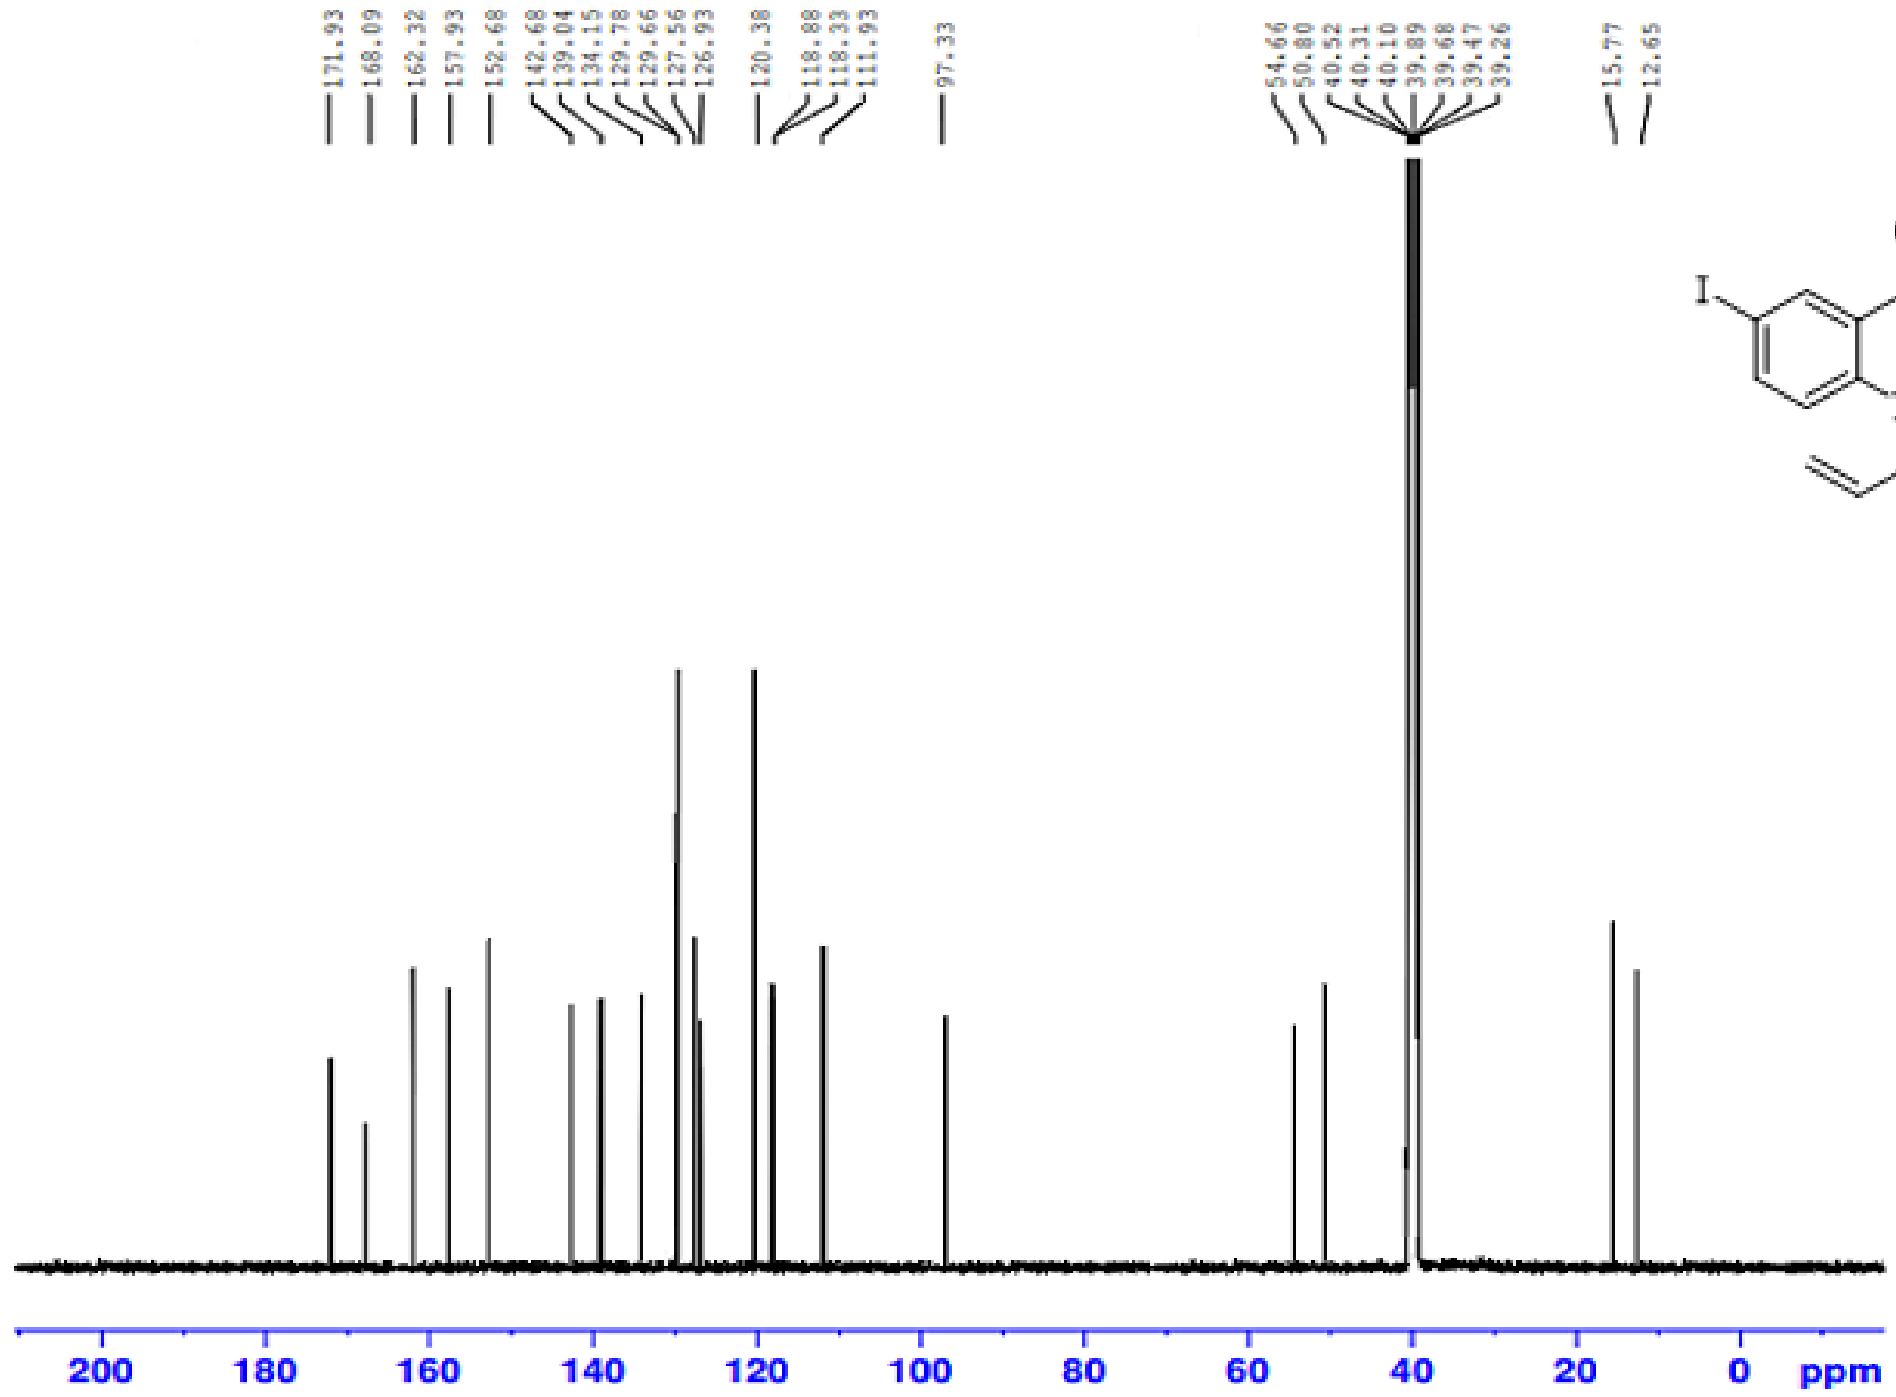



Relax. delay 1.000 sec  
 Pulse 74.1 degrees  
 Acq. time 4.004 sec  
 Width 8000.0 Hz  
 11 repetitions  
 OBSERVE H1, 300.0687875 MHz  
 DATA PROCESSING  
 FT size 65536  
 Total time 19 min, 19 sec

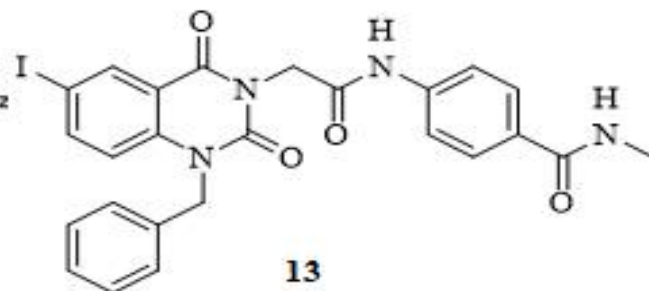

13

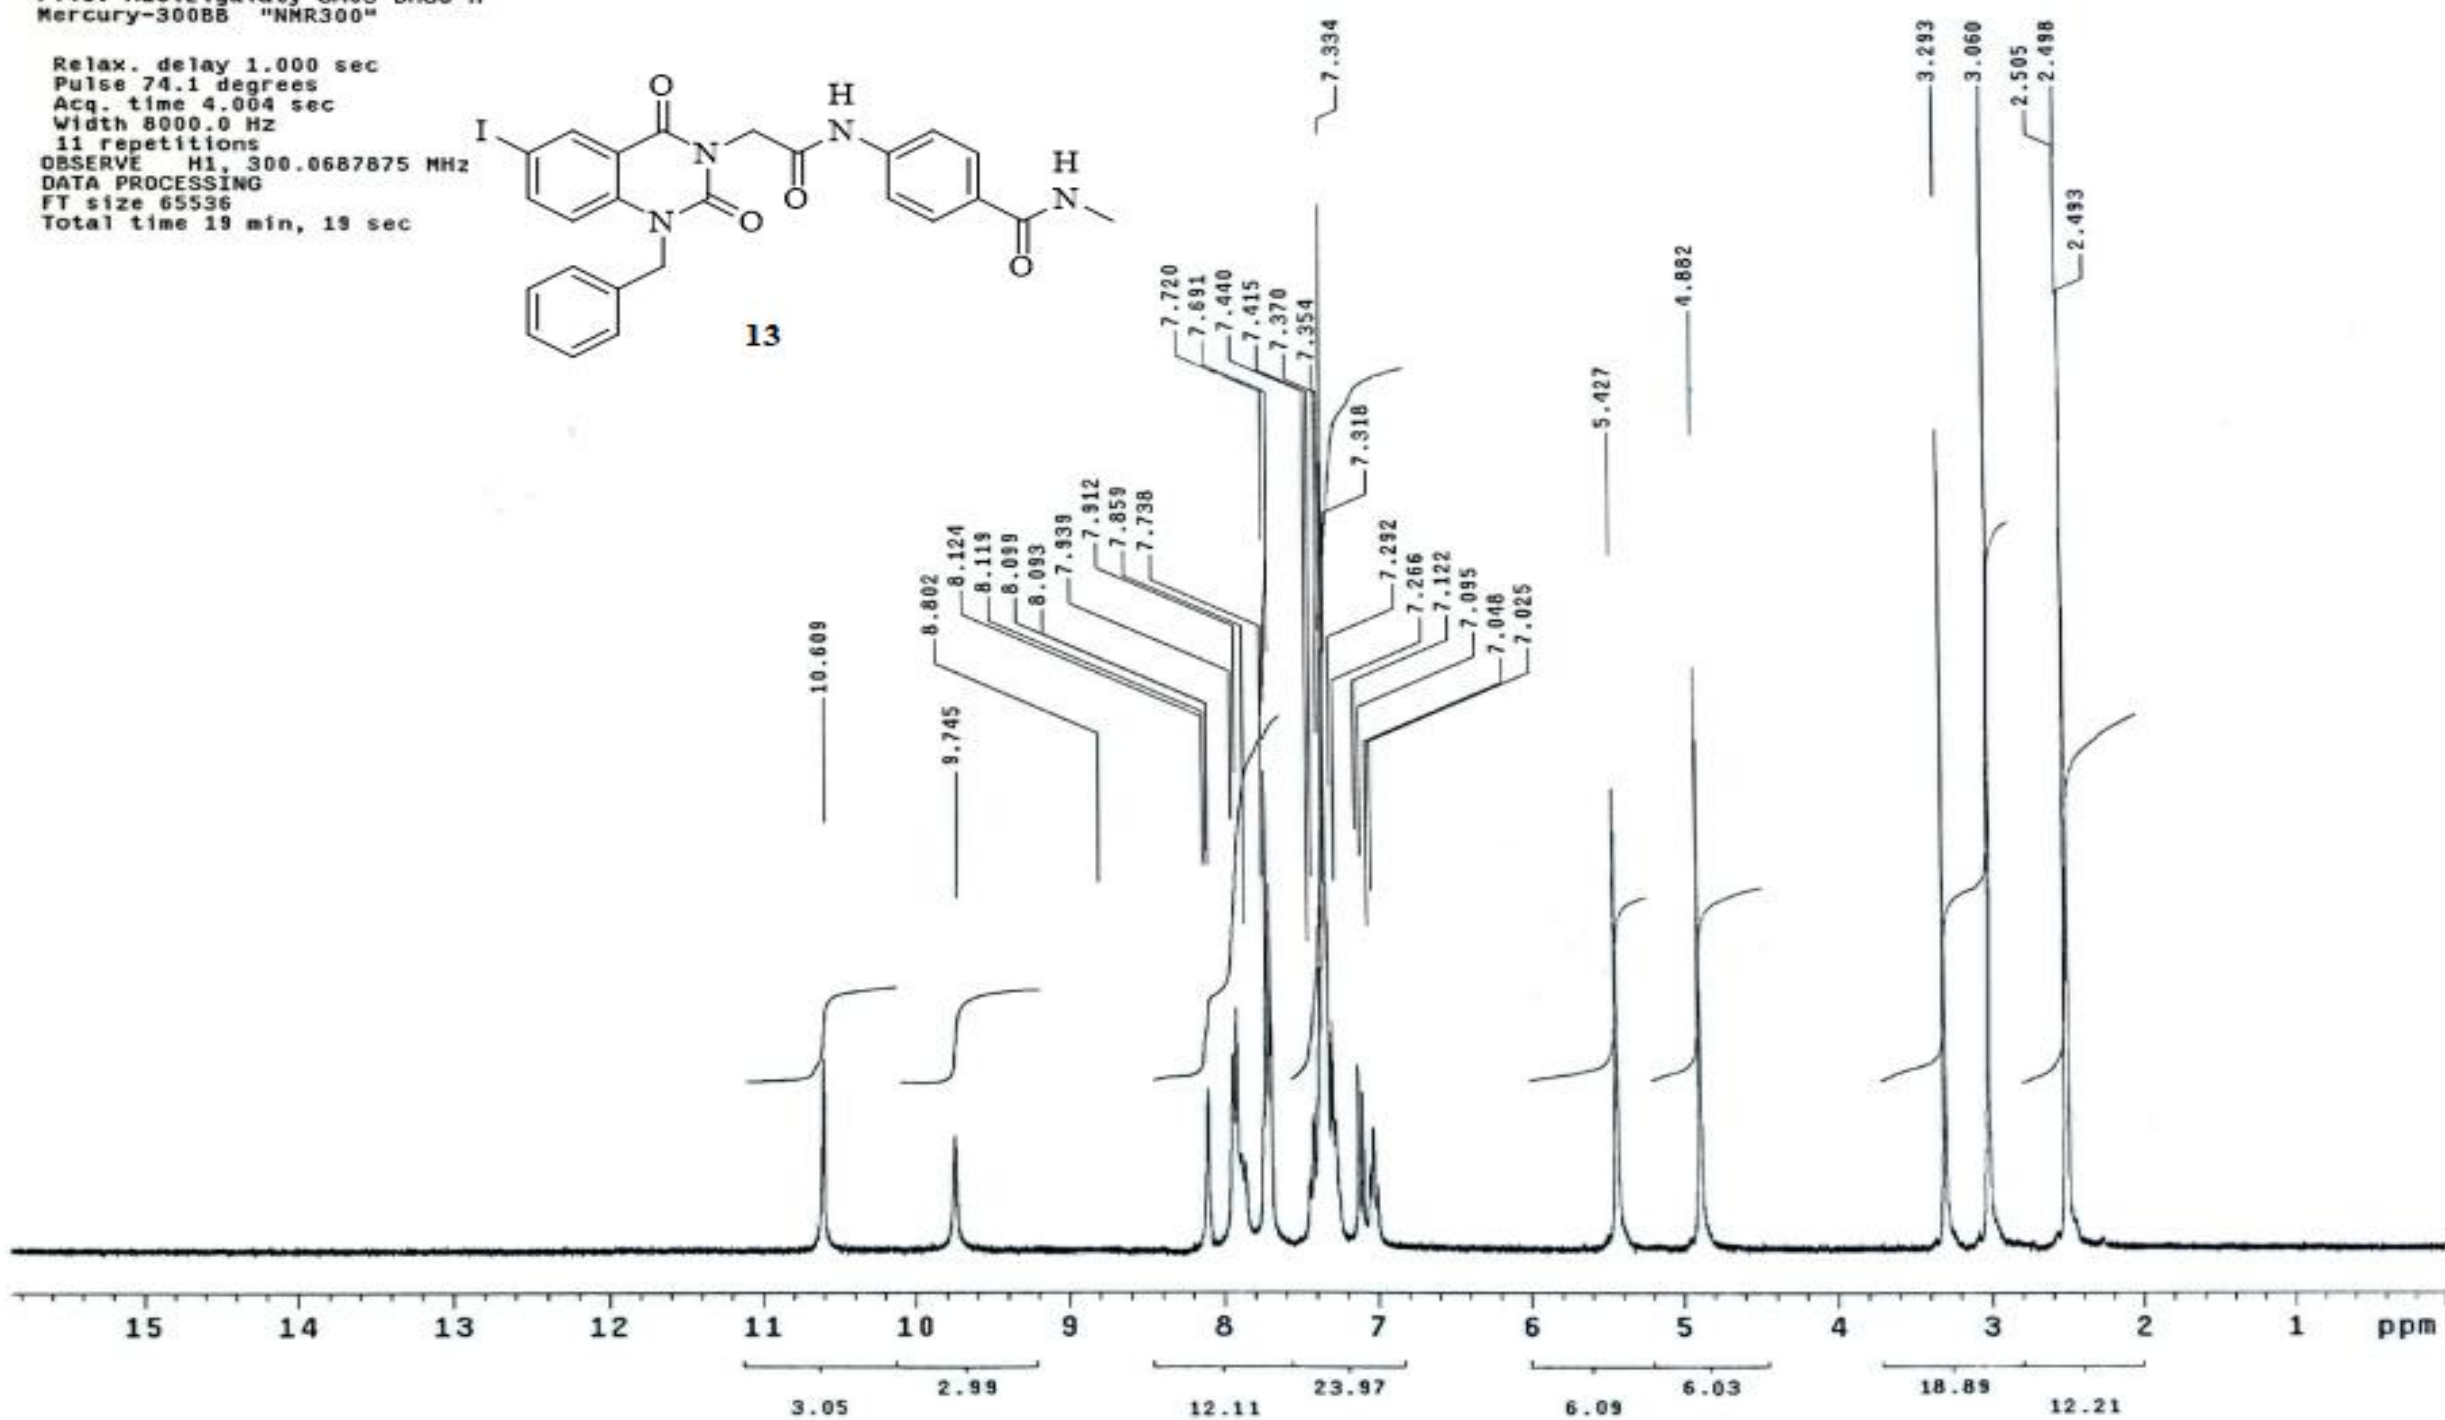

167.61  
165.84  
165.76  
165.65  
164.83

144.18  
142.04  
134.20  
133.32  
131.33  
130.70  
130.51  
129.92  
129.77  
129.46  
124.91  
121.40  
119.98  
118.94

55.91  
52.06  
40.61  
40.40  
40.19  
39.98  
39.77  
39.57  
39.36  
24.70

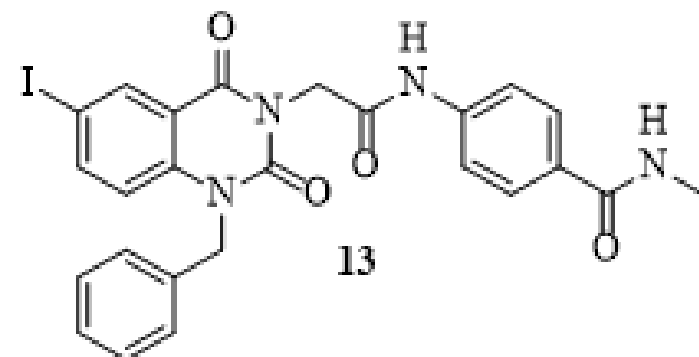

13

```

--
RG          202.37
DW          20.800 usec
DE           6.50 usec
TE           298.0 K
D1          2.00000000 sec
D11         0.03000000 sec
TD0         1

```

```

----- CHANNEL f1 -----
SFO1       100.6379178 MHz
NUC1        13C
P1          10.00 usec
PLW1       45.00000000 W

```

```

----- CHANNEL f2 -----
SFO2       400.1916008 MHz
NUC2         1H
CPDPRG[2]  waltz16

```

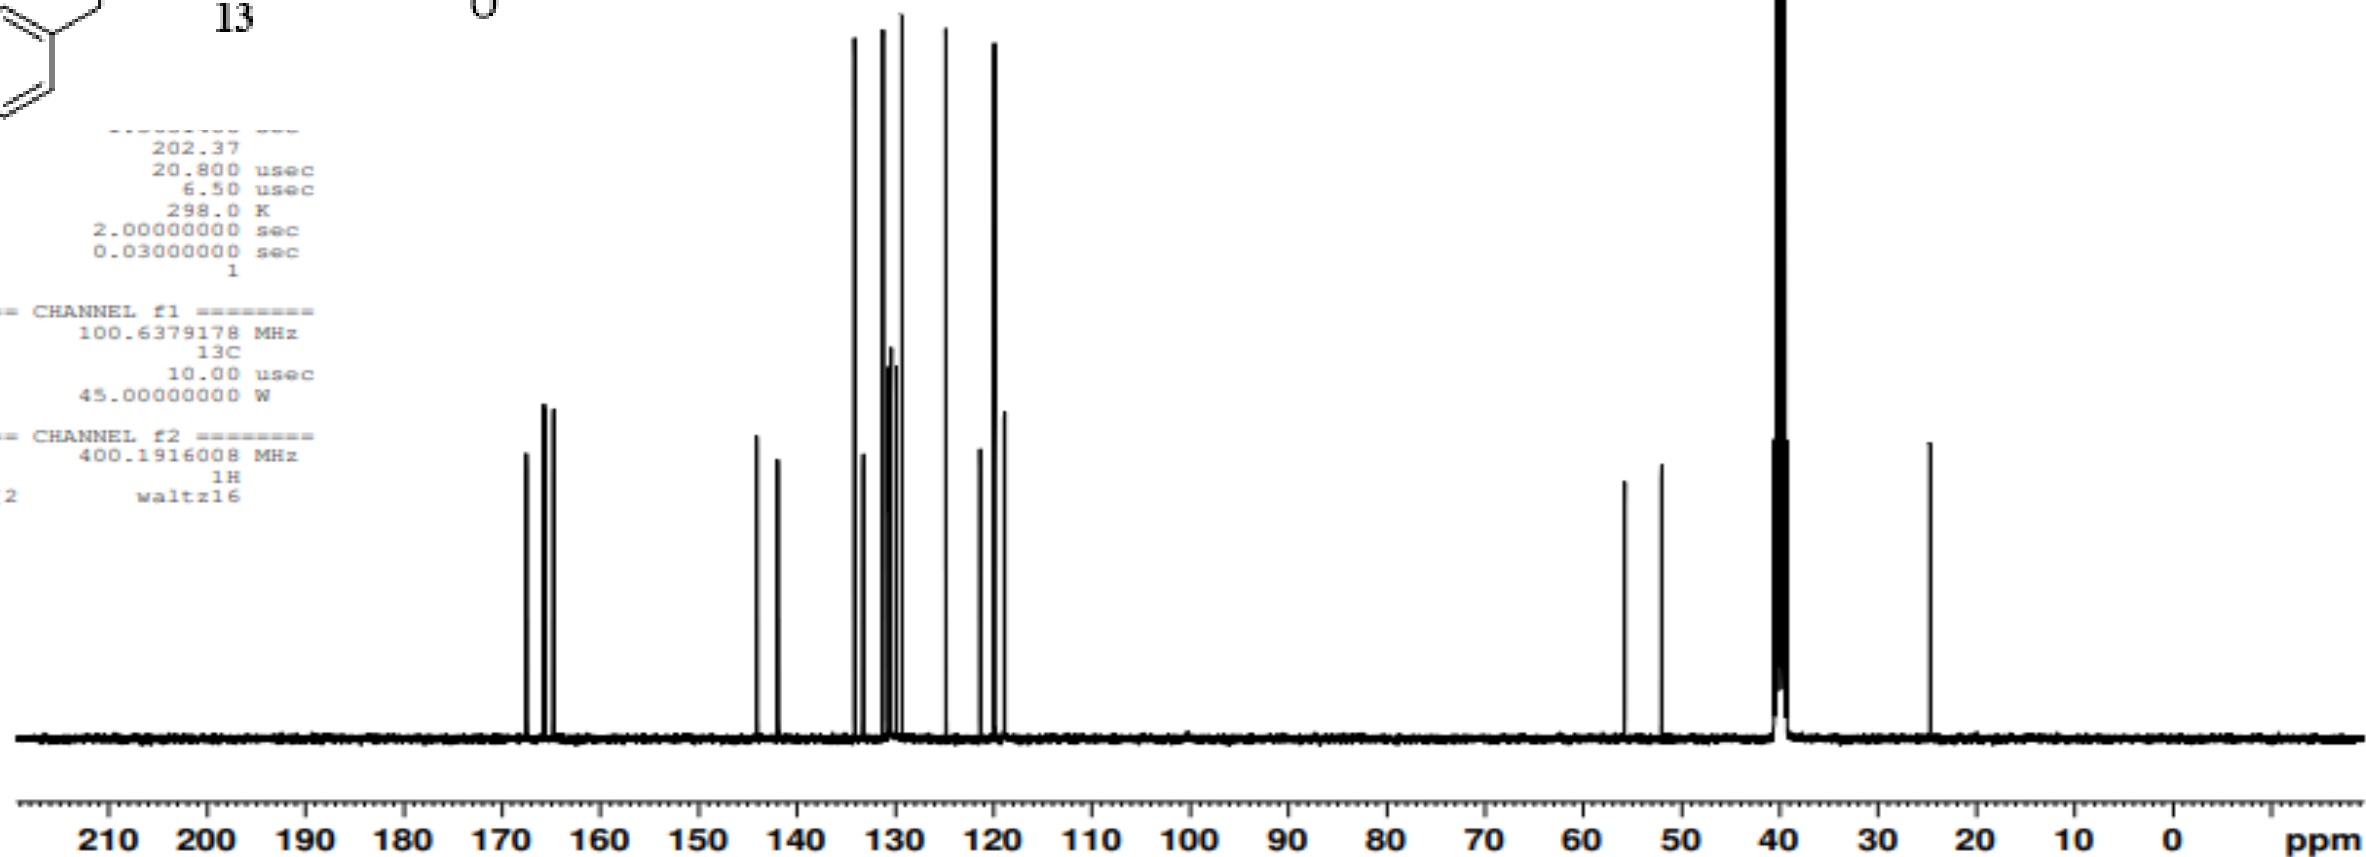

Author  
Content

= delta3  
= single\_pulse

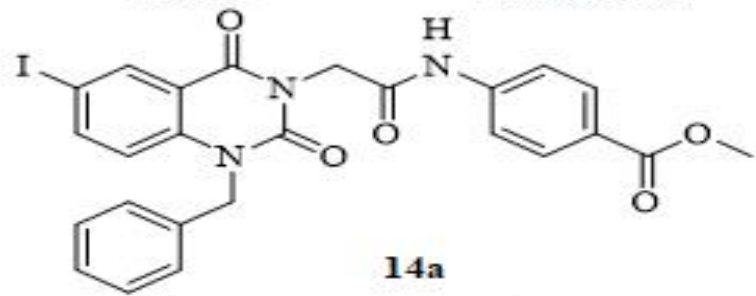

```

X_domain           = 1H
X_offset           = 5.0 [ppm]
X_freq             = 500.15991521 [MHz]
X_sweep           = 12.5250501 [kHz]
X_resolution       = 0.76446839 [Hz]
Irr_domain         = 1H
Irr_offset         = 5.0 [ppm]
Irr_freq           = 500.15991521 [MHz]
Tri_domain         = 1H
Tri_offset         = 5.0 [ppm]
Tri_freq           = 500.15991521 [MHz]
X_acq_duration     = 1.30809856 [s]
Digital_filter     = TRUE
Filter_factor      = 8
Af_version         = 1
Delay_of_start     = 1.99999974 [s]
Actual_start_time  = 29-JUL-2012 18:
Acq_delay          = 9.82 [us]
Digital_filter_status = 2P
Clipped            = FALSE
Dc_balanced        = FALSE
X90                = 13.1 [us]
Irr90              = 13.1 [us]
Tri90              = 10 [us]
Qua90              = 10 [us]
Qui90              = 10 [us]
Sex90              = 10 [us]
Sep90              = 10 [us]
Oct90              = 10 [us]
Non90              = 10 [us]
Dec90              = 10 [us]
X90_hi             = 92 [us]
Irr90_hi           = 92 [us]
Tri90_hi           = 10 [us]
Qua90_hi           = 10 [us]
Qui90_hi           = 10 [us]
Sex90_hi           = 10 [us]
Sep90_hi           = 10 [us]
Oct90_hi           = 10 [us]
Non90_hi           = 10 [us]
Dec90_hi           = 10 [us]
X90_lo             = 92 [us]
Irr90_lo           = 92 [us]
Tri90_lo           = 10 [us]
Qua90_lo           = 10 [us]
Qui90_lo           = 10 [us]
Sex90_lo           = 10 [us]
Sep90_lo           = 10 [us]
Oct90_lo           = 10 [us]
Non90_lo           = 10 [us]
    
```

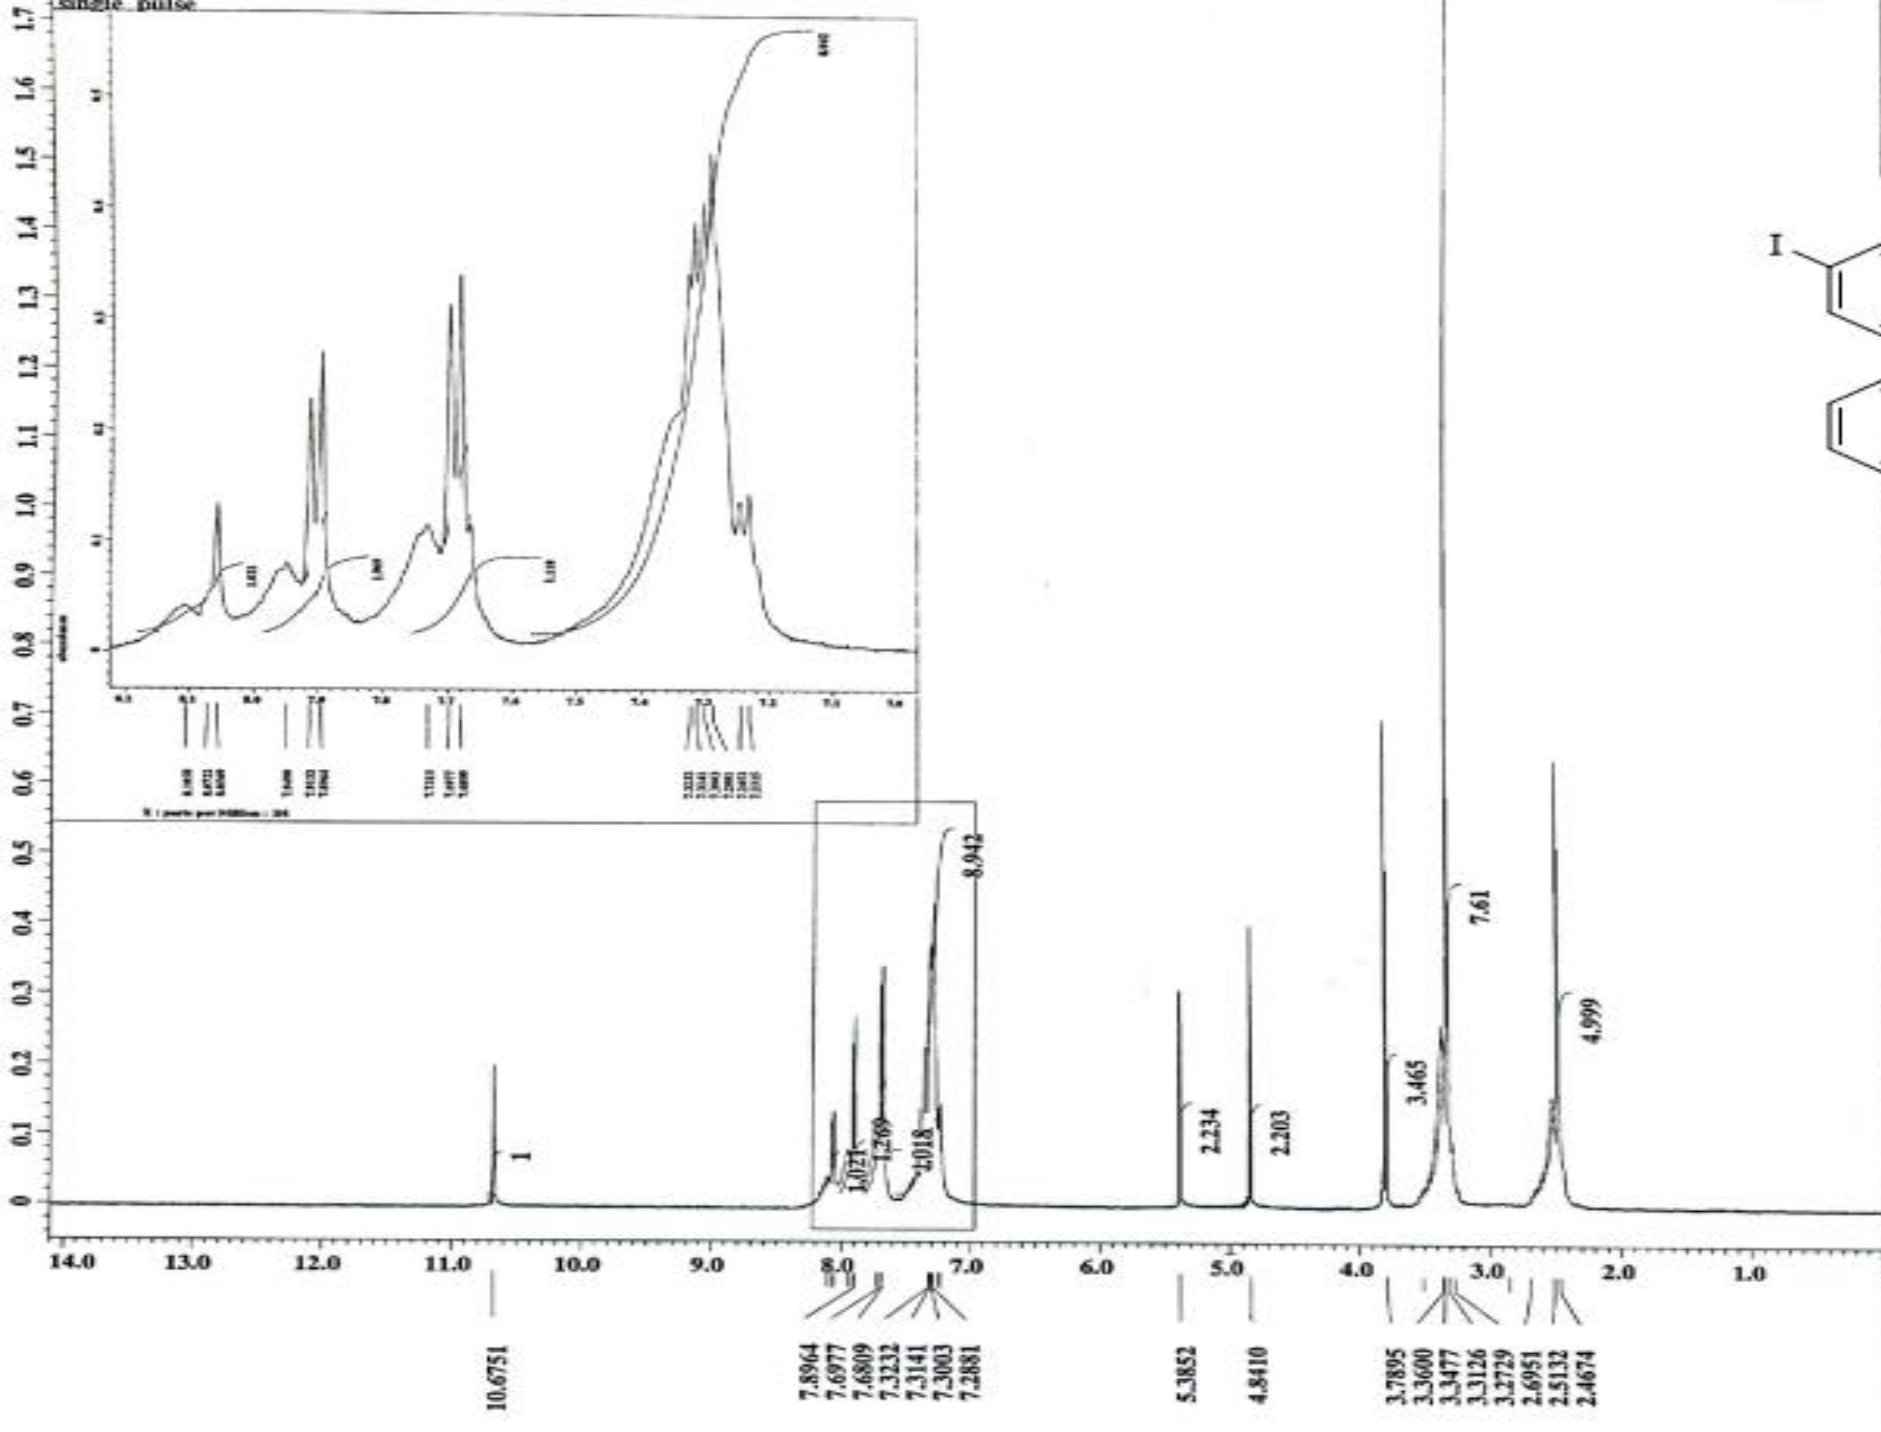

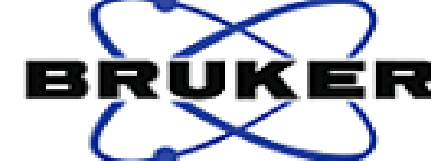

Current Data Parameters

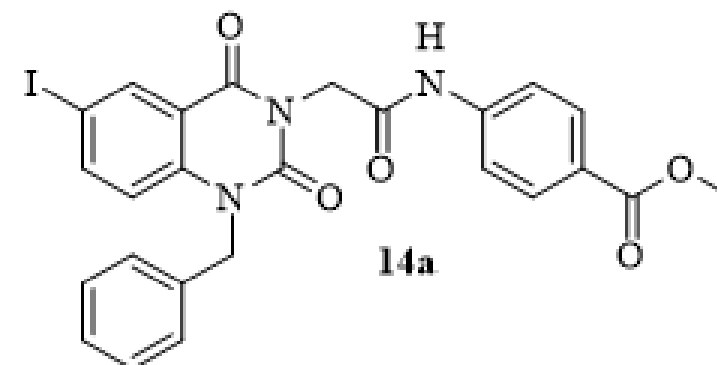

-----  
AQ 1.3631488 sec  
RG 205.37  
DW 20.800 usec  
DE 6.50 usec  
TE 300.0 K  
D1 2.00000000 sec  
D11 0.03000000 sec  
TD0 1

----- CHANNEL f1 -----  
SFO1 100.6278588 MHz  
NUC1 13C  
P1 10.00 usec  
PLW1 47.00000000 W

----- CHANNEL f2 -----  
SFO2 400.1516006 MHz  
NUC2 1H  
CPDPRG[2] waltz16  
PCPD2 90.00 usec  
PLW2 18.00000000 W  
PLW12 0.34722000 W  
PLW13 0.28125000 W

F2 - Processing parameters  
SI 32768  
SF 100.6177975 MHz  
WDW EM  
SSB 0  
LB 1.00 Hz  
GB 0  
PC 1.40

170.62  
166.09  
158.74  
153.06  
149.59  
141.24  
137.09  
132.29  
129.66  
126.29  
124.11  
122.62  
117.08  
112.68  
109.38  
96.25

57.08  
54.66  
40.50  
40.29  
40.08  
39.87  
39.67  
39.46  
39.25  
33.09

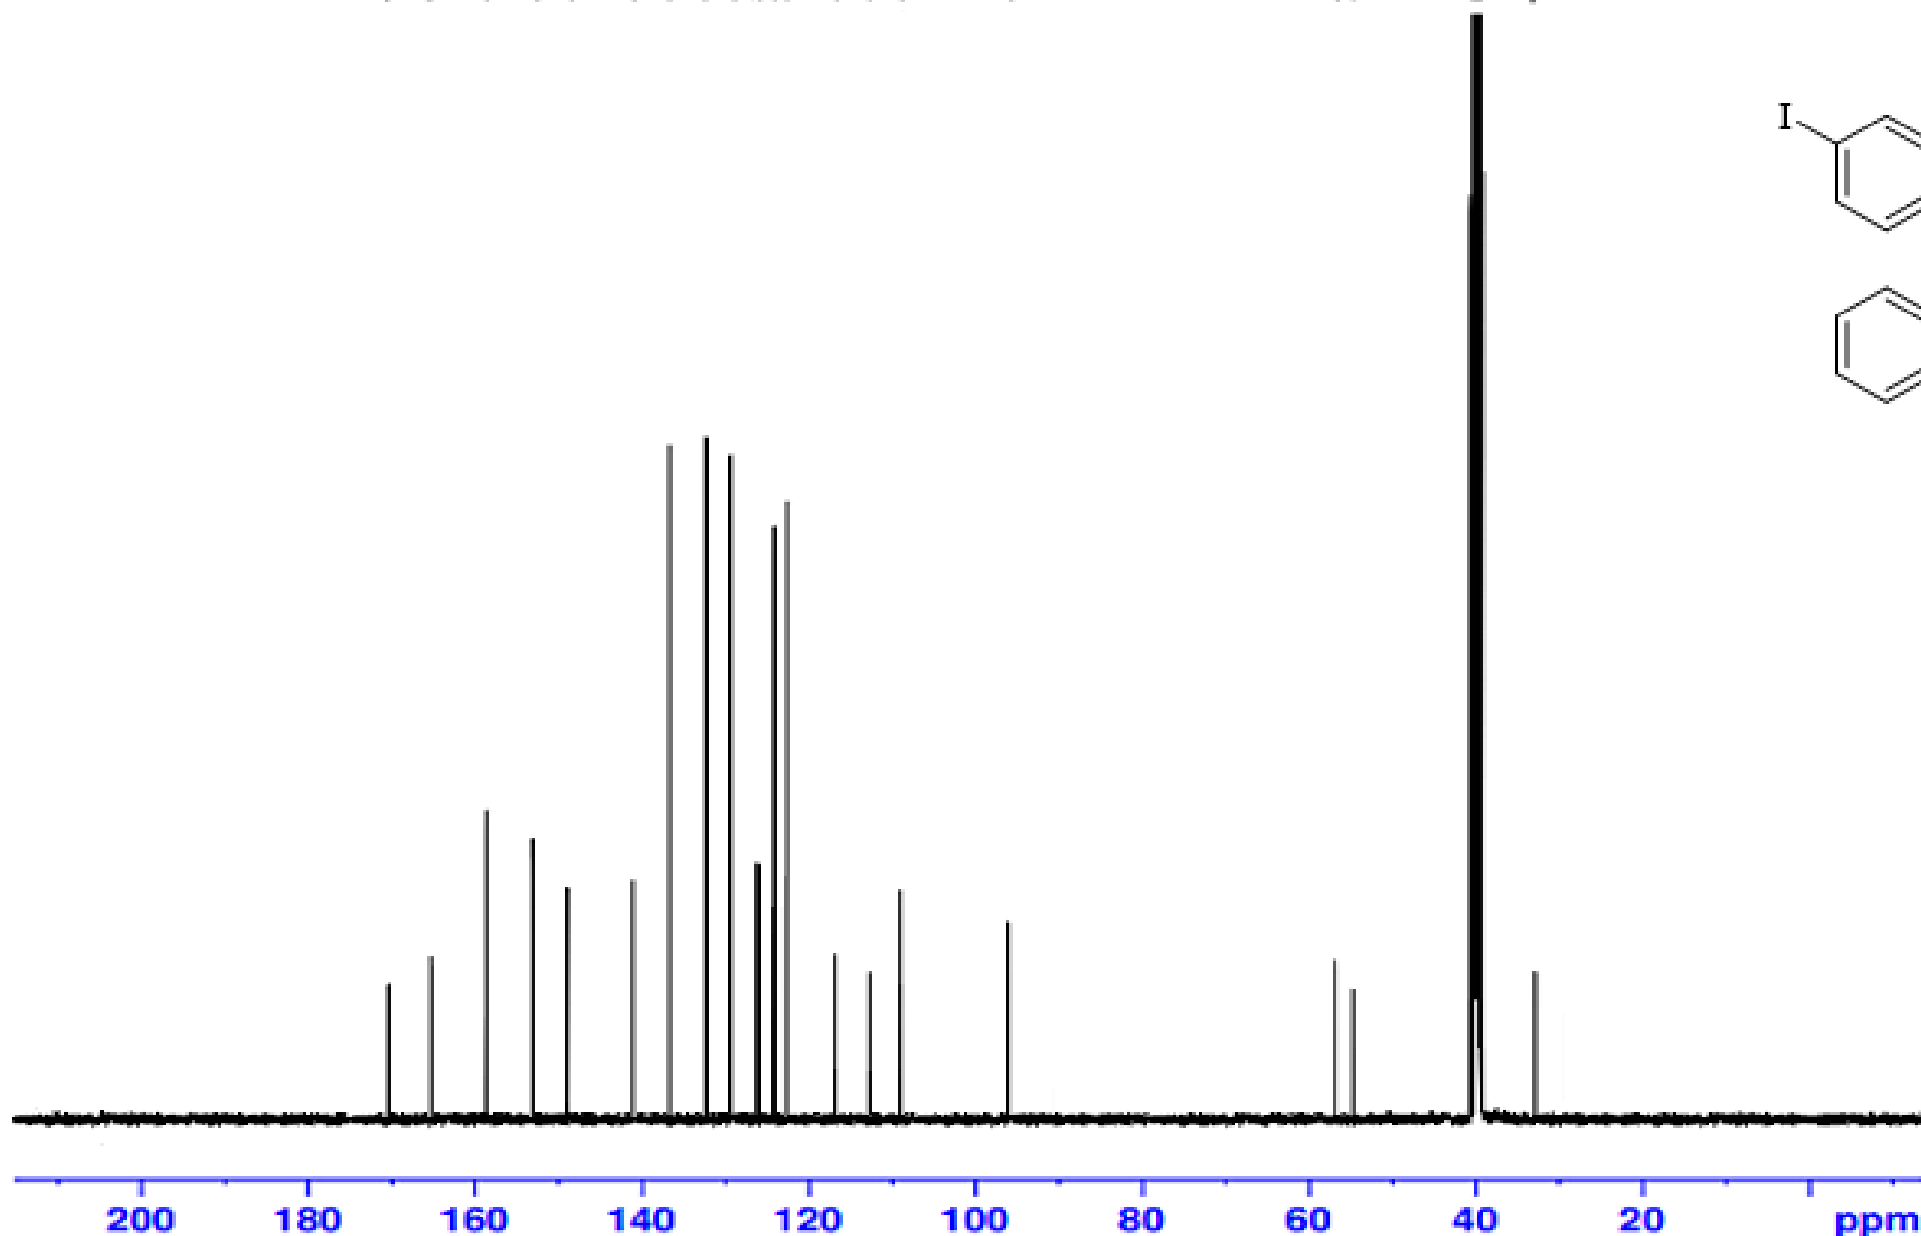

abundance

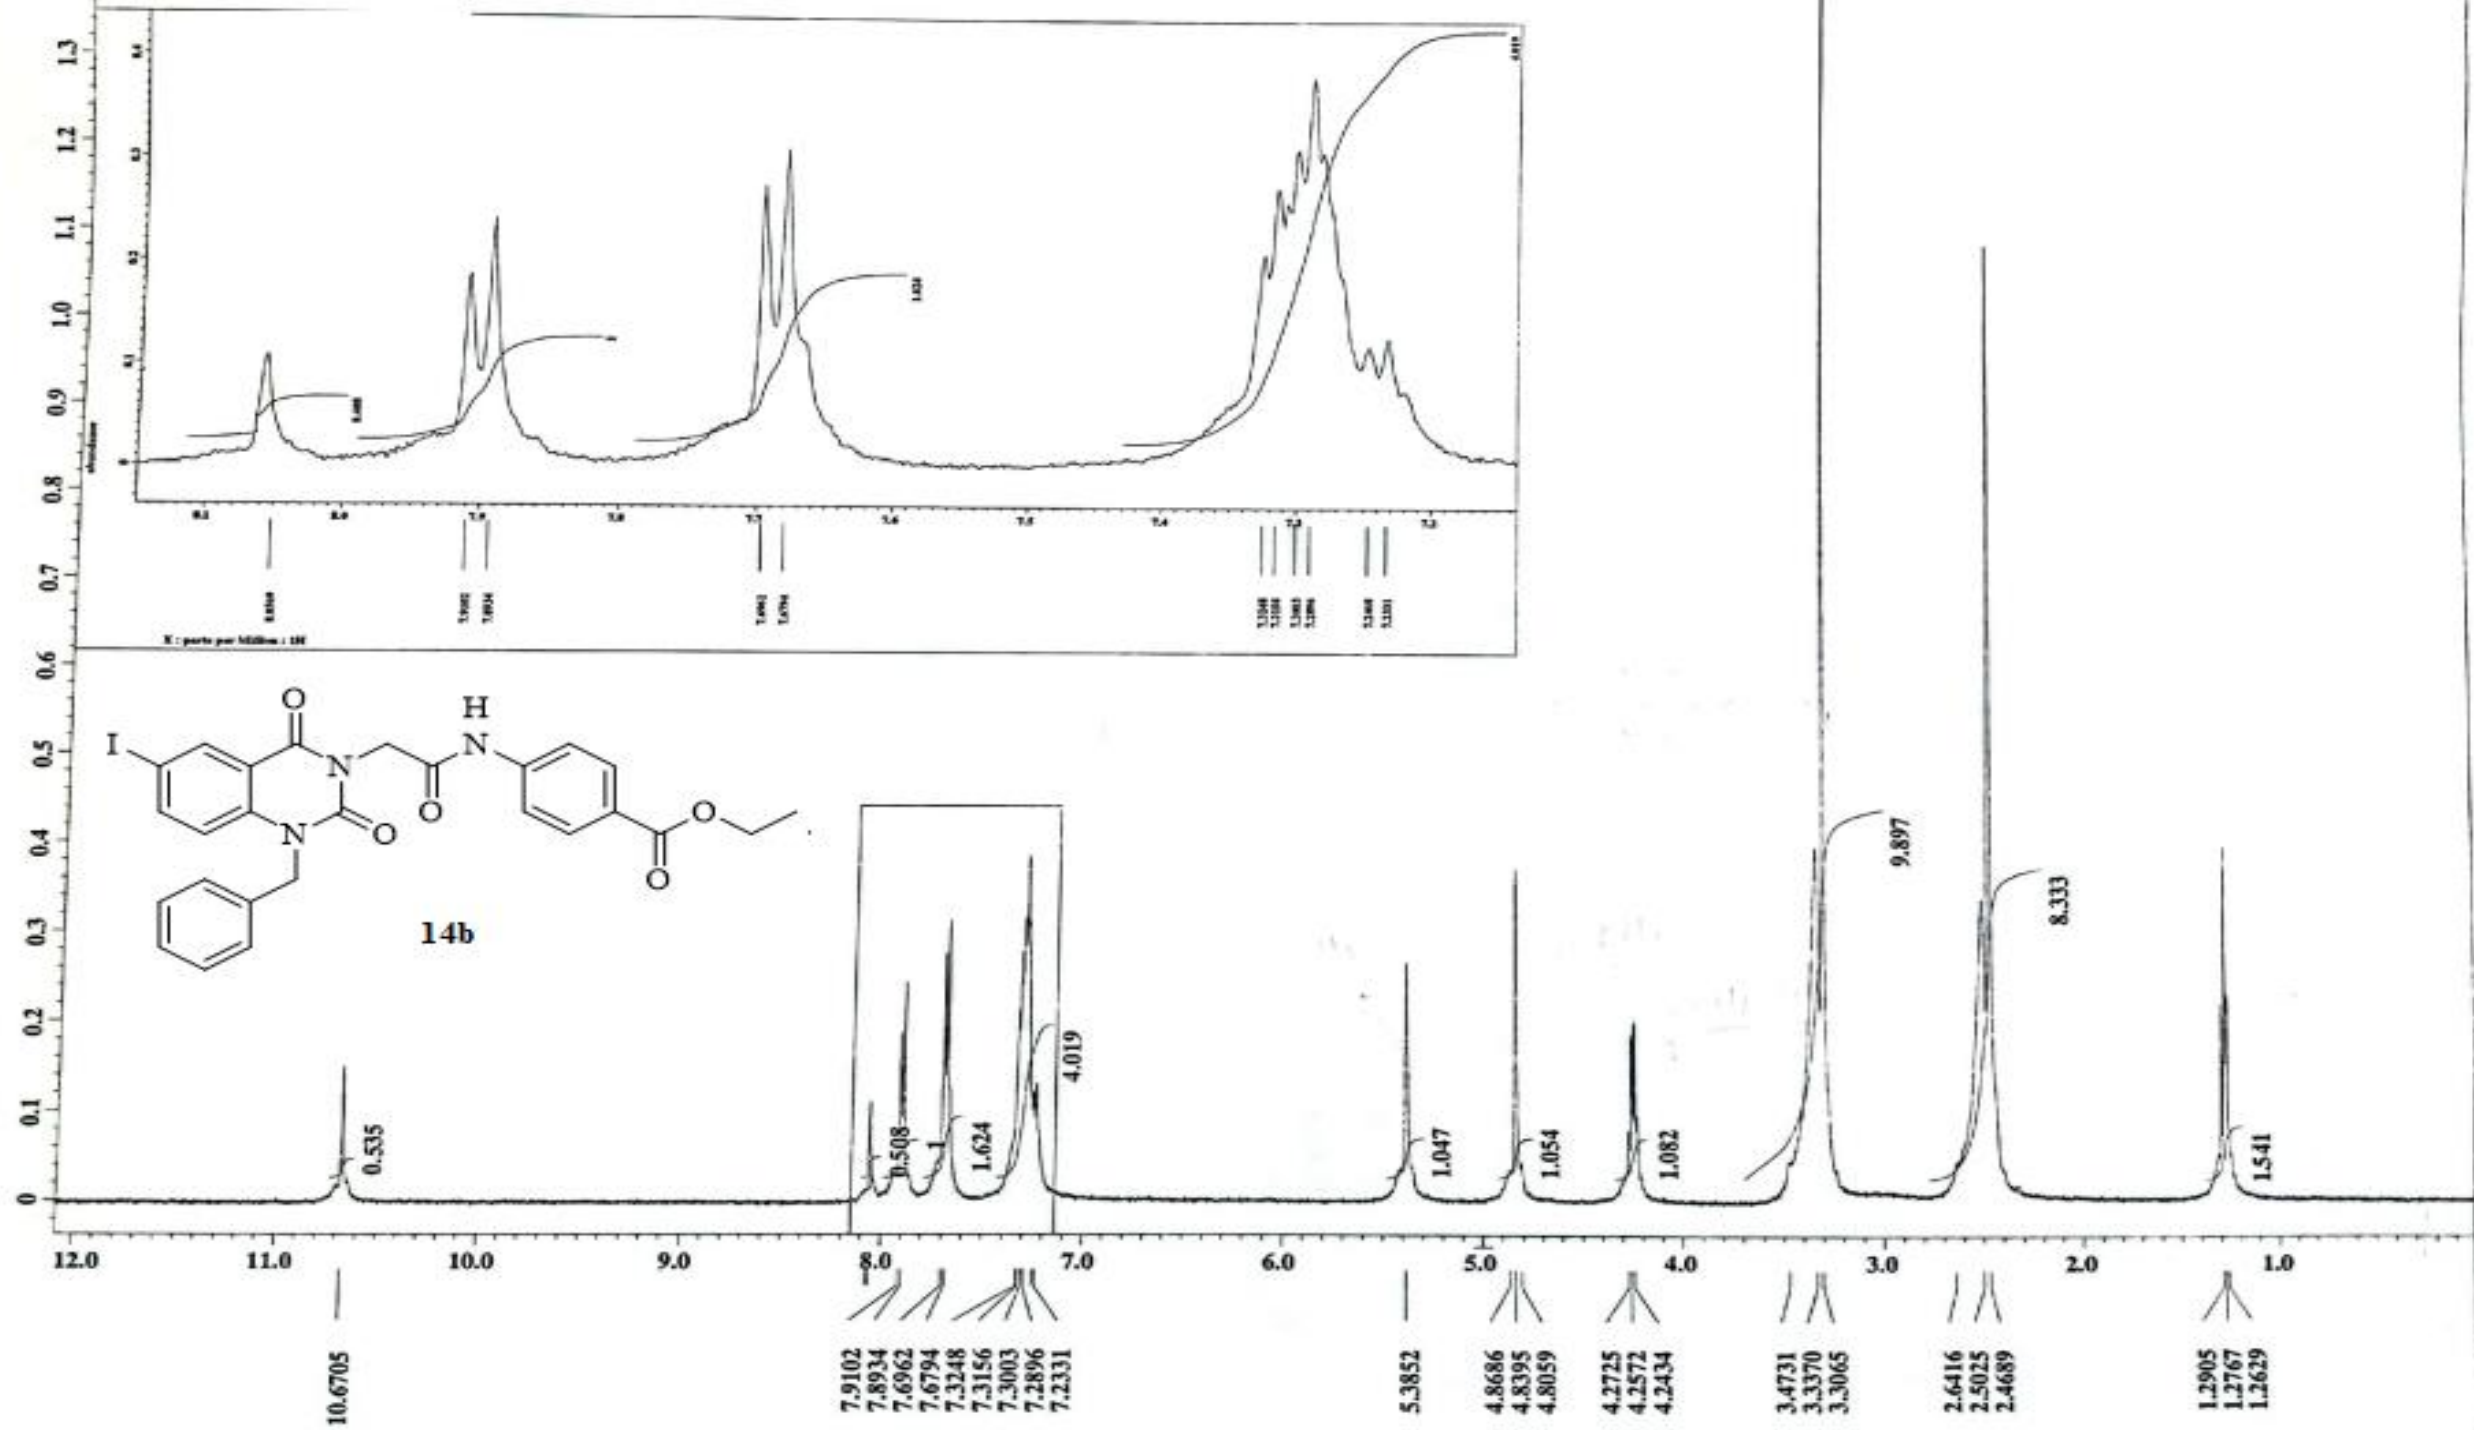

Relax. delay 1.000 sec  
 Pulse 74.1 degrees  
 Acq. time 4.004 sec  
 Width 8000.0 Hz  
 39 repetitions  
 OBSERVE H1, 300.0687875 MHz  
 DATA PROCESSING  
 FT size 65536  
 Total time 19 min, 19 sec

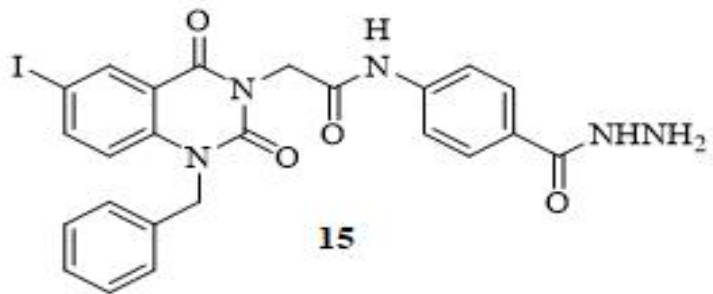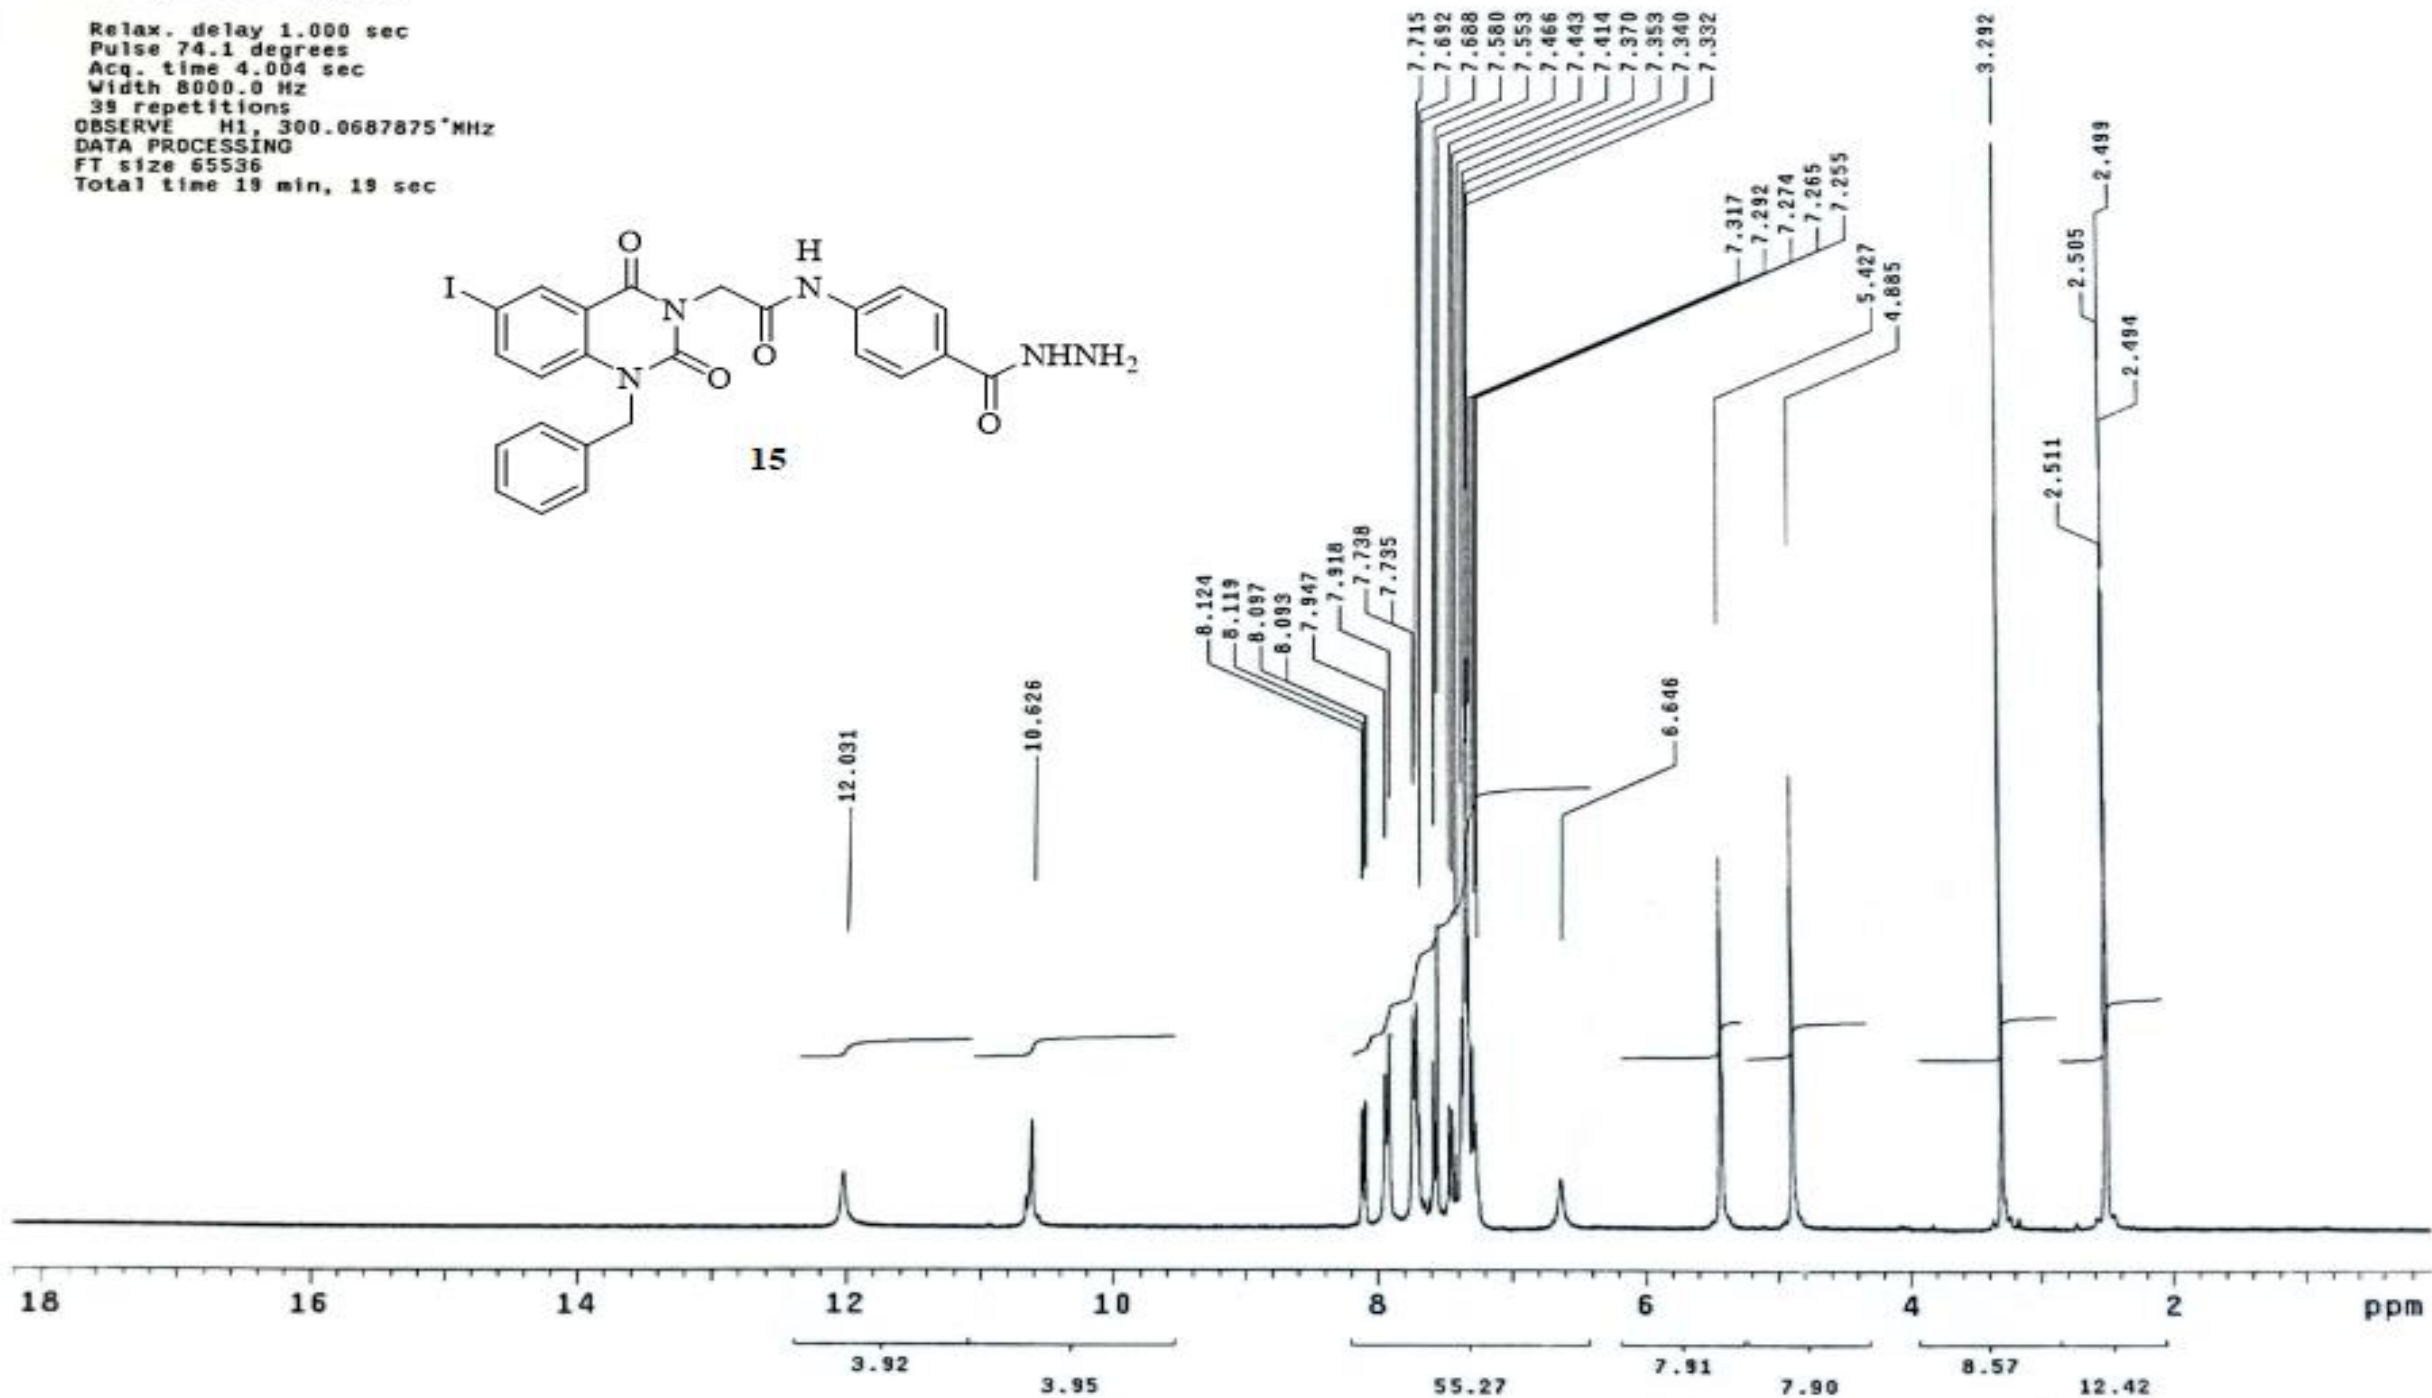

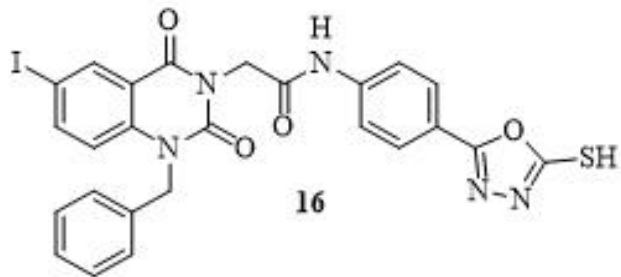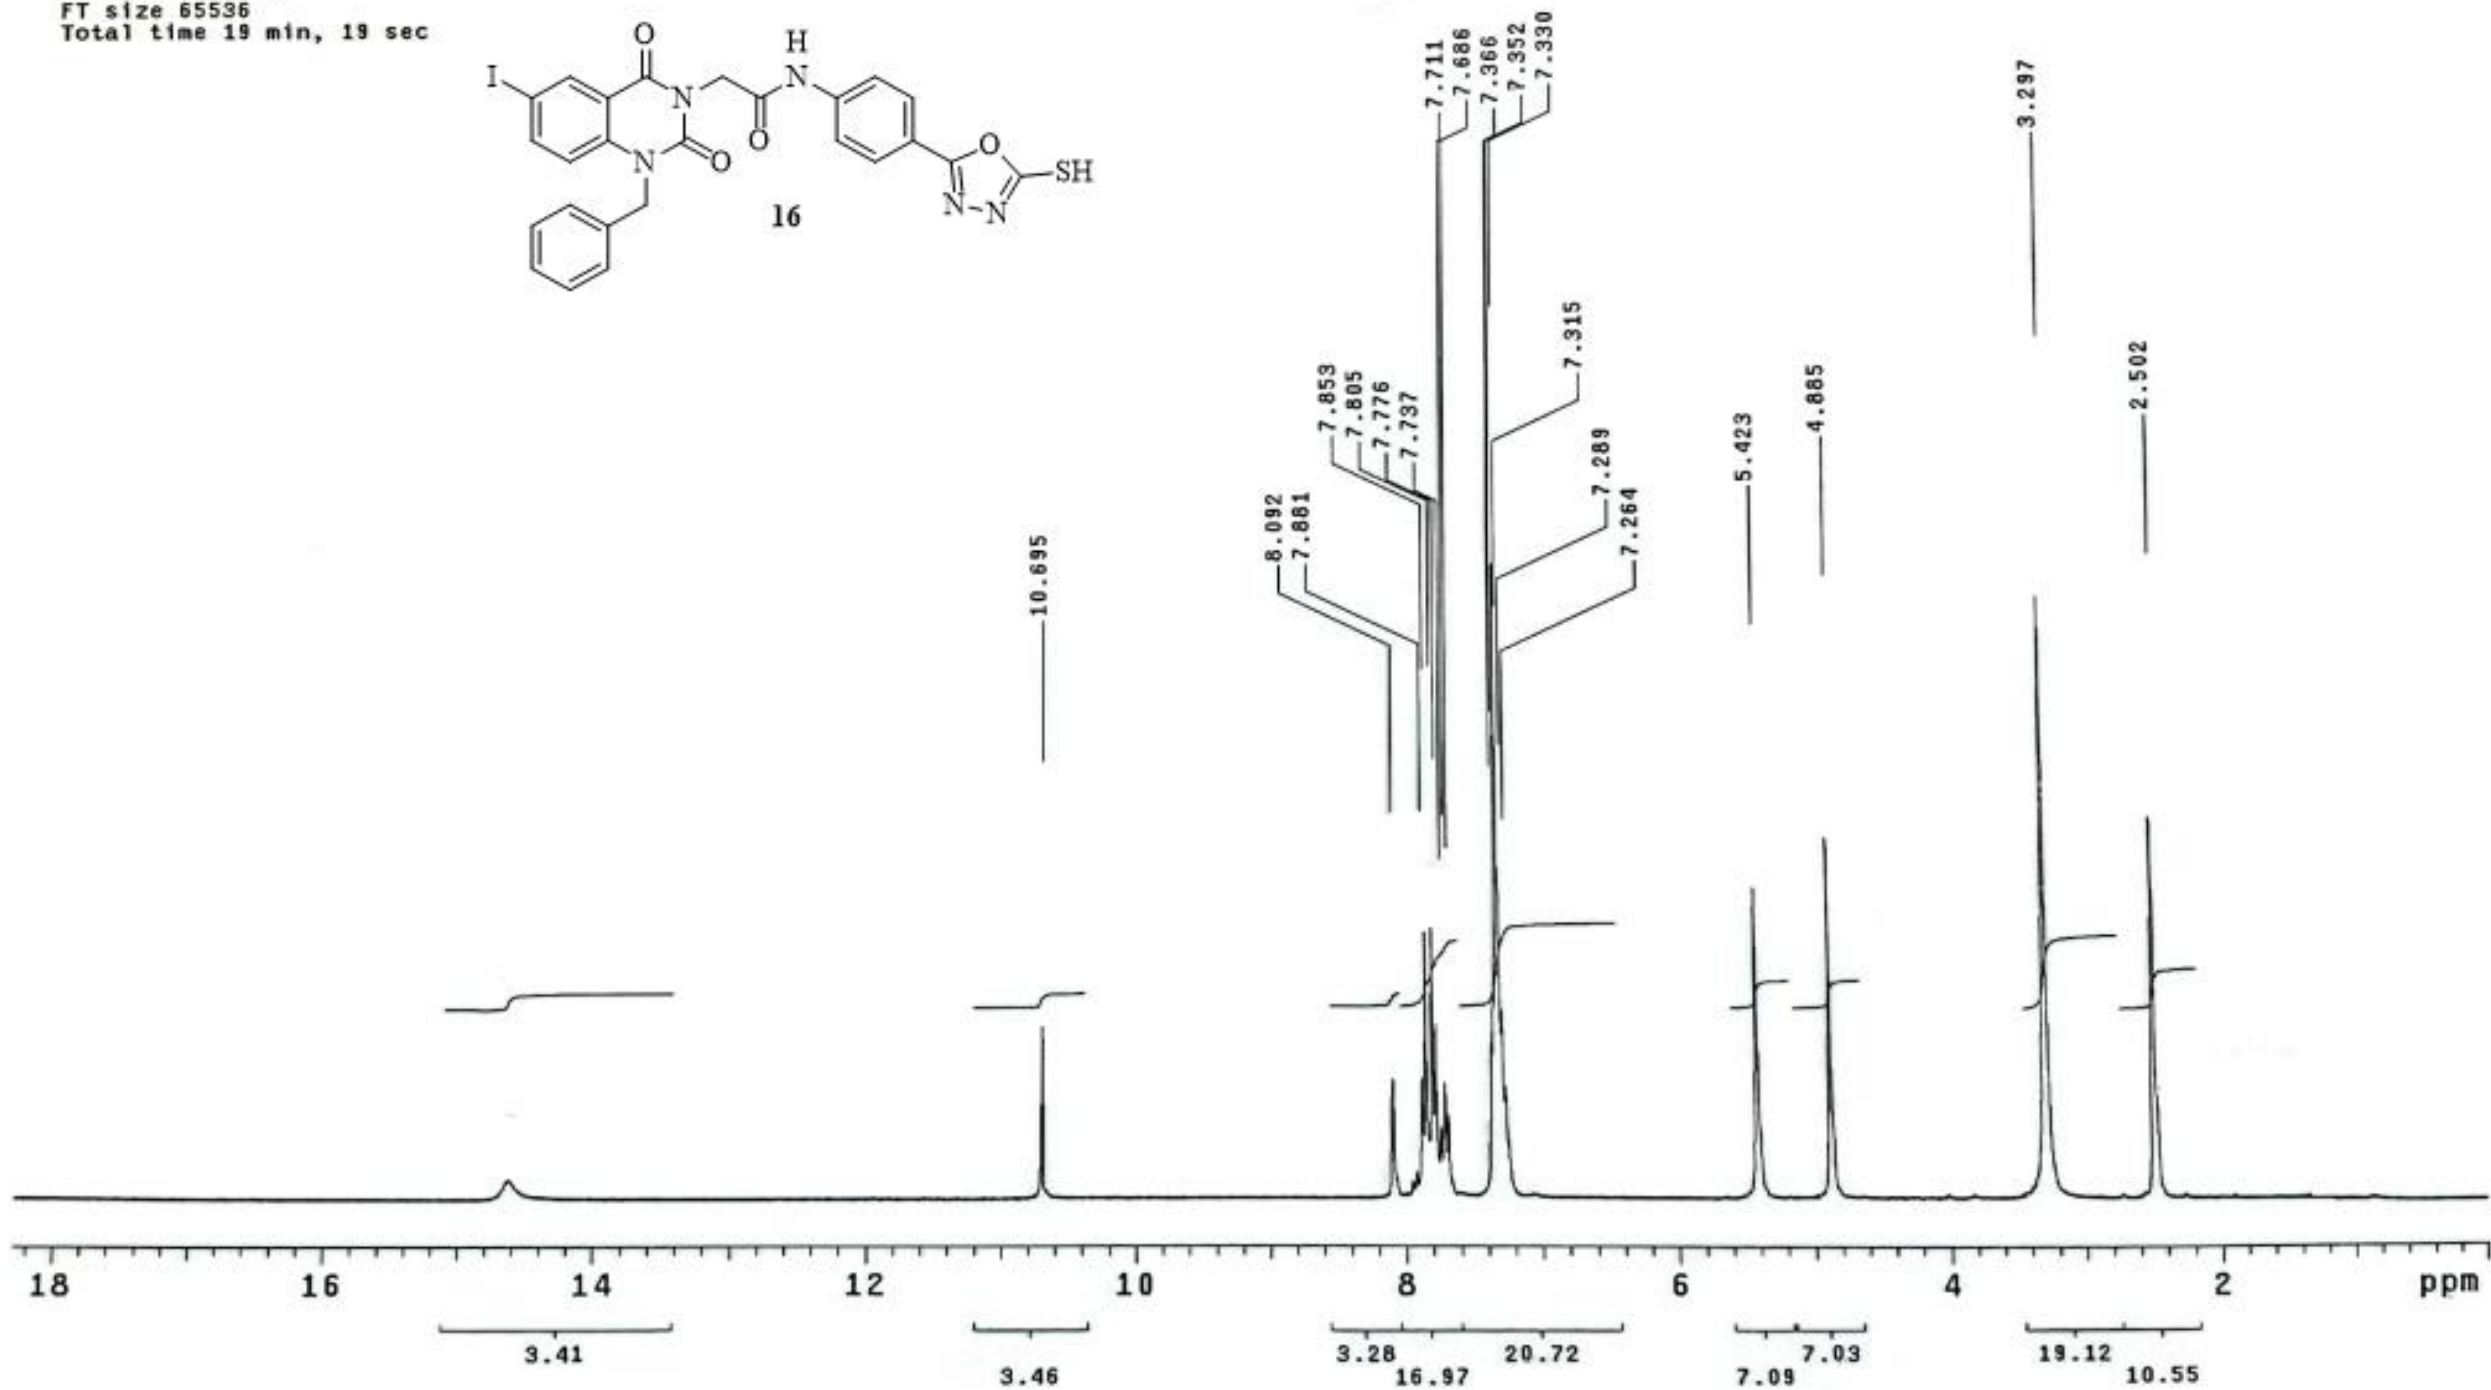

abundance

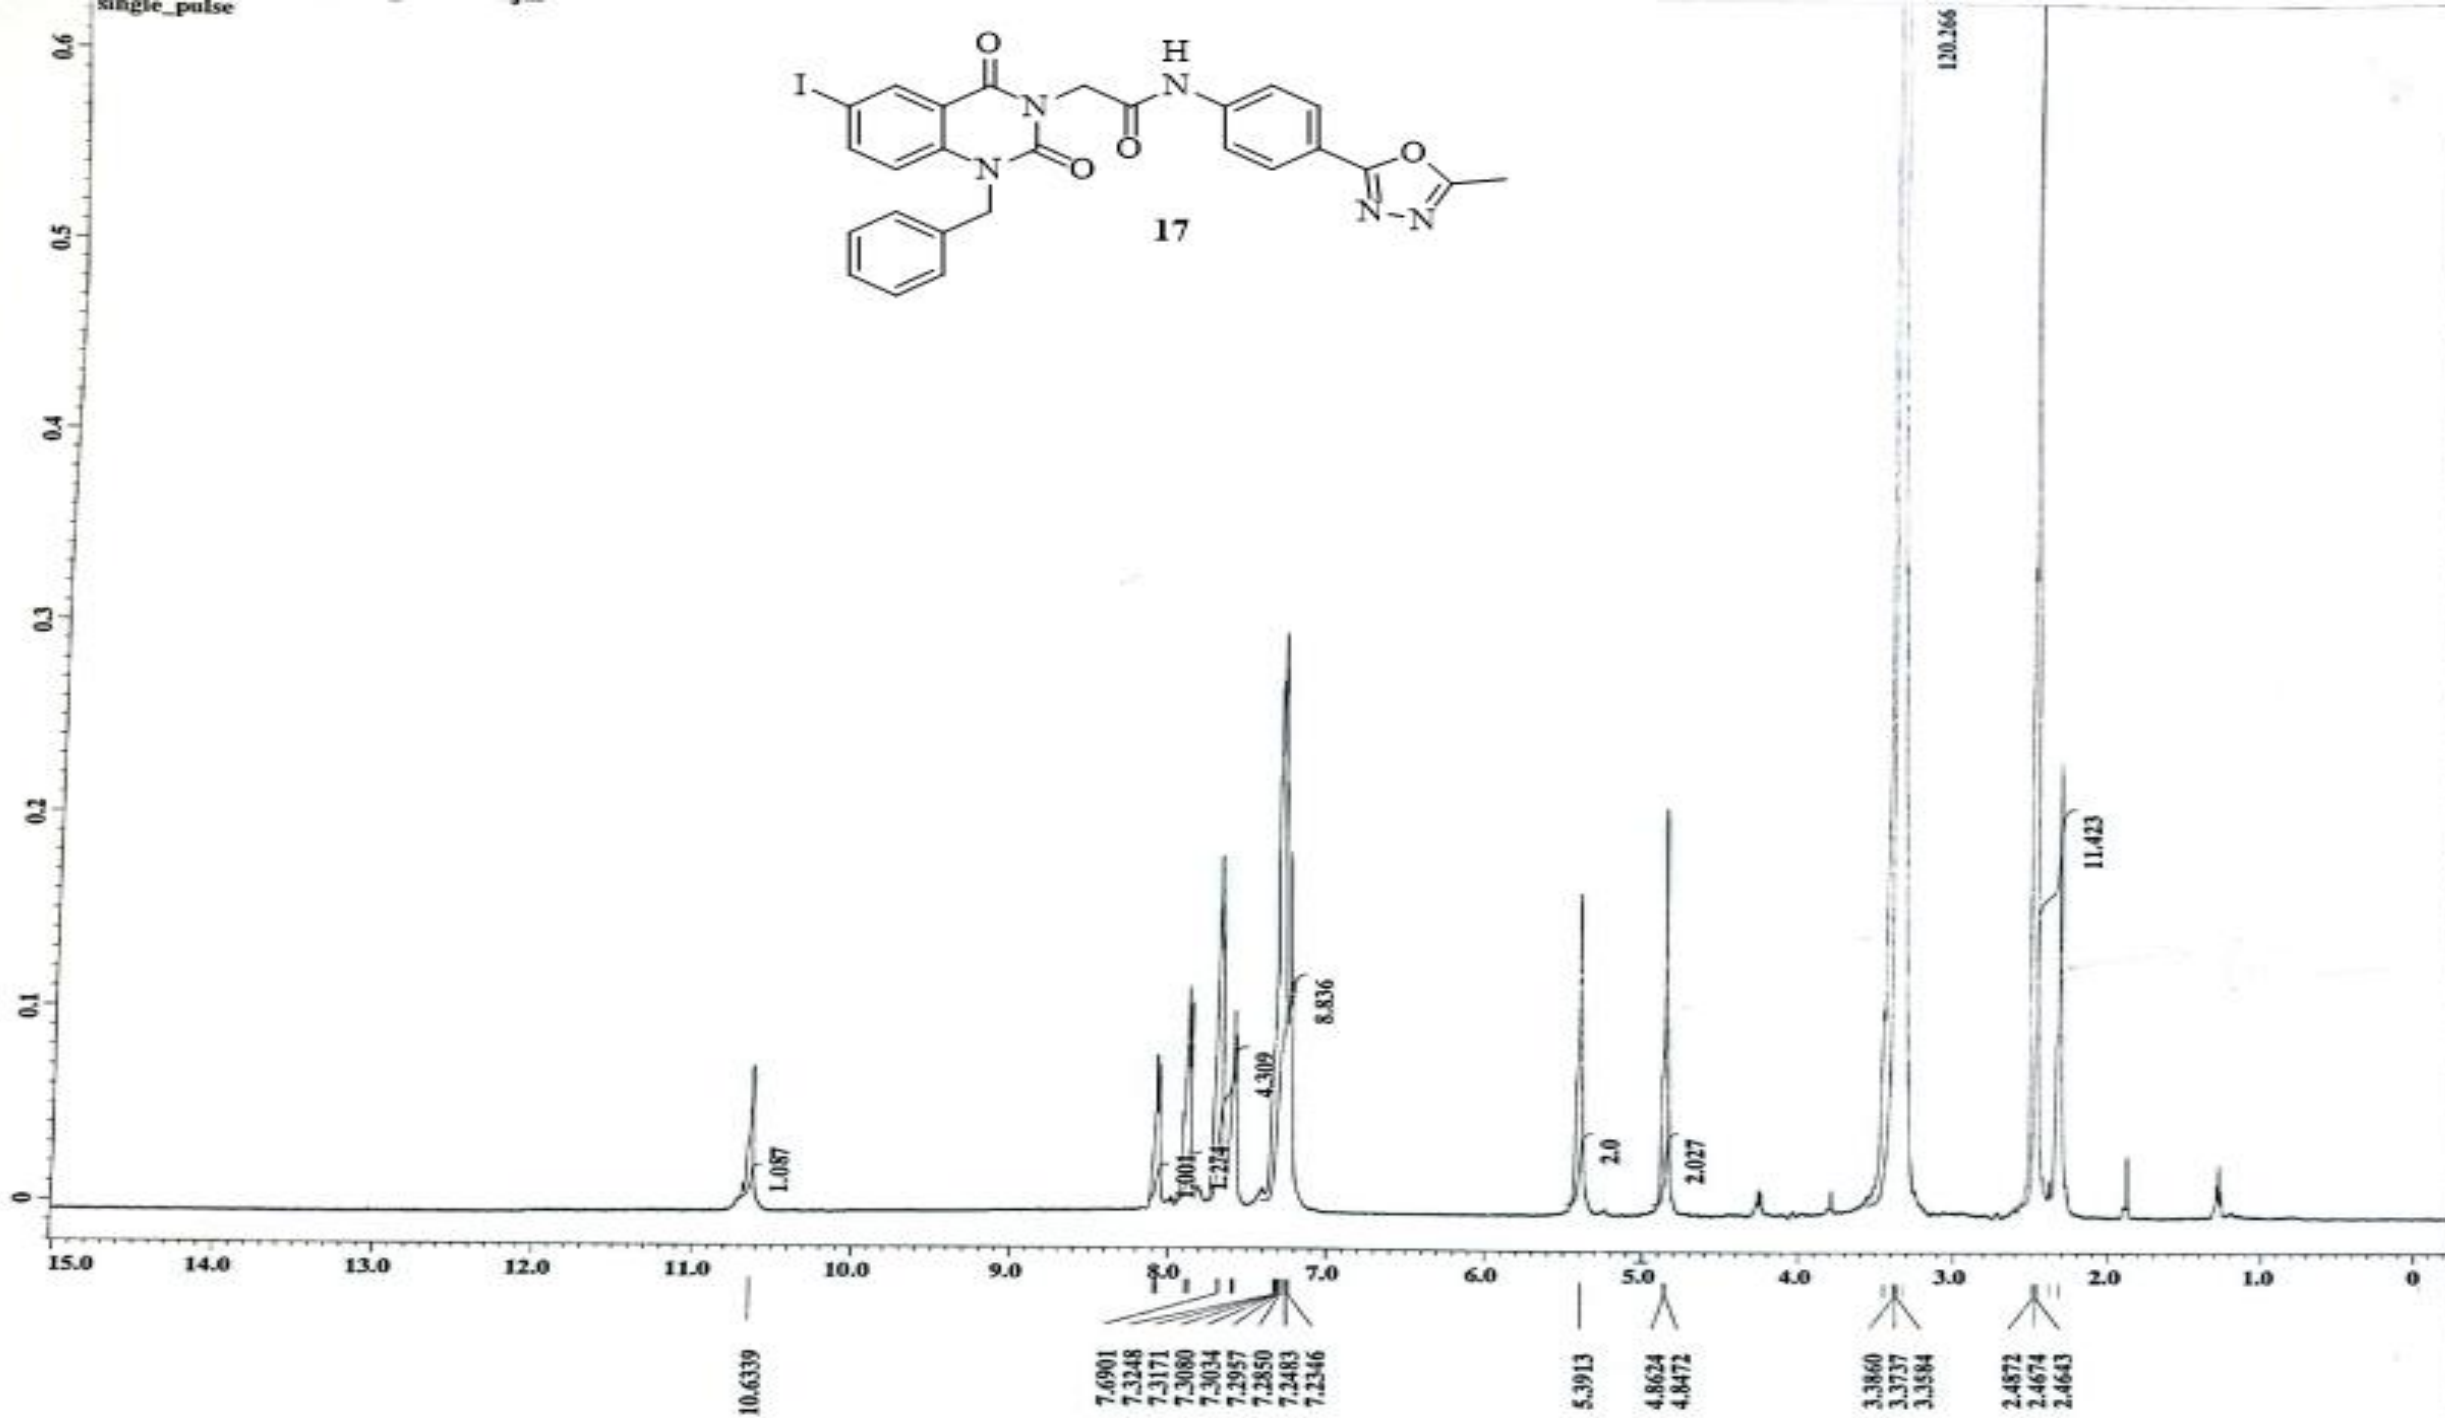



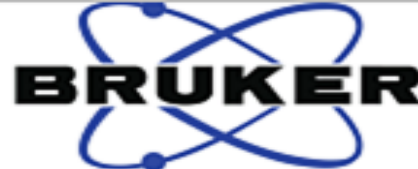

Current Data Parameters

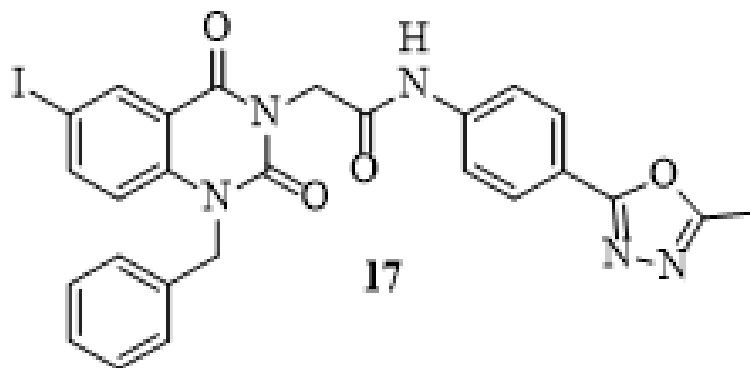

```
FIDRES      0.366798 Hz
AQ          1.3631488 sec
RG          205.37
DW          20.800 usec
DE          6.50 usec
TE          300.0 K
D1          2.0000000 sec
D11         0.0300000 sec
TD0         1
```

```
----- CHANNEL f1 -----
SFO1       100.6278588 MHz
NUC1        13C
P1          10.00 usec
PLW1       47.00000000 W
```

```
----- CHANNEL f2 -----
SFO2       400.1516006 MHz
NUC2         1H
CPDPRG[2    waltz16
PCPD2       90.00 usec
PLW2       18.00000000 W
PLW12      0.34722000 W
PLW13      0.28125000 W
```

```
F2 - Processing parameters
SI          32768
SF          100.6177975 MHz
WDW         EM
SSB         0
LB          1.00 Hz
GB          0
PC          1.40
```

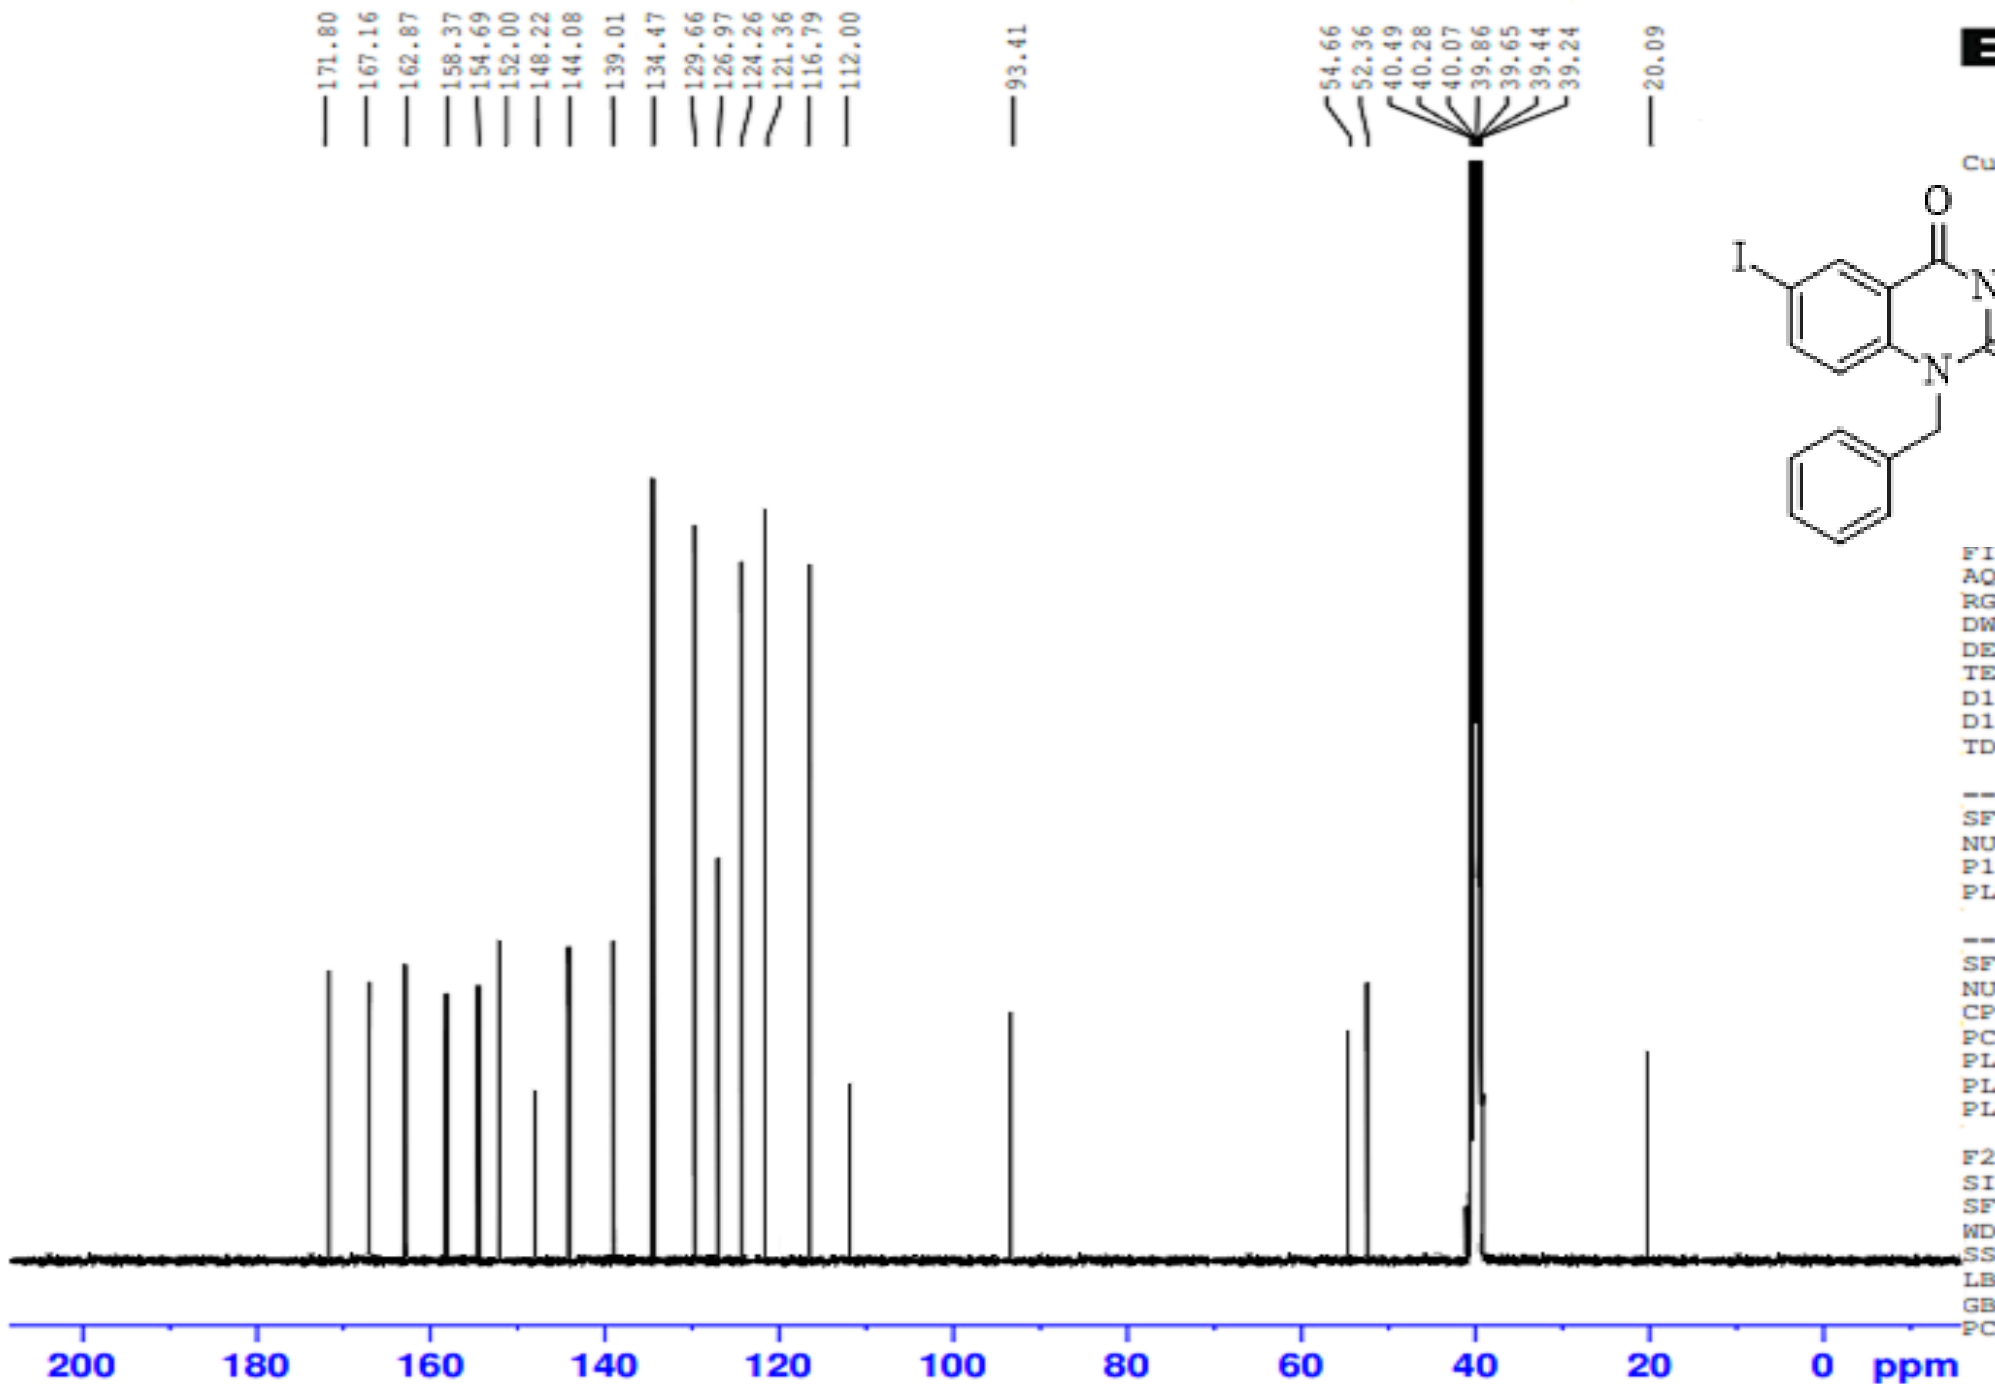

Pulse 74.1 degrees  
Acq. time 4.004 sec  
Width 8000.0 Hz  
13 repetitions  
OBSERVE H1, 300.0687875 MHz  
DATA PROCESSING  
FT size 65536  
Total time 19 min, 19 sec

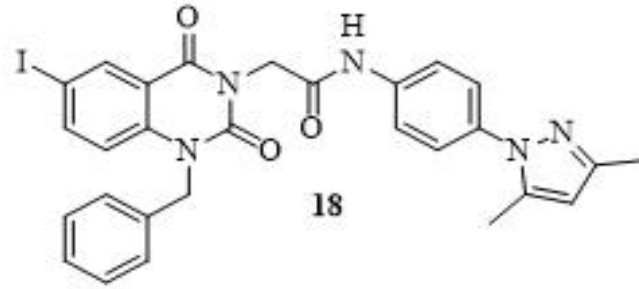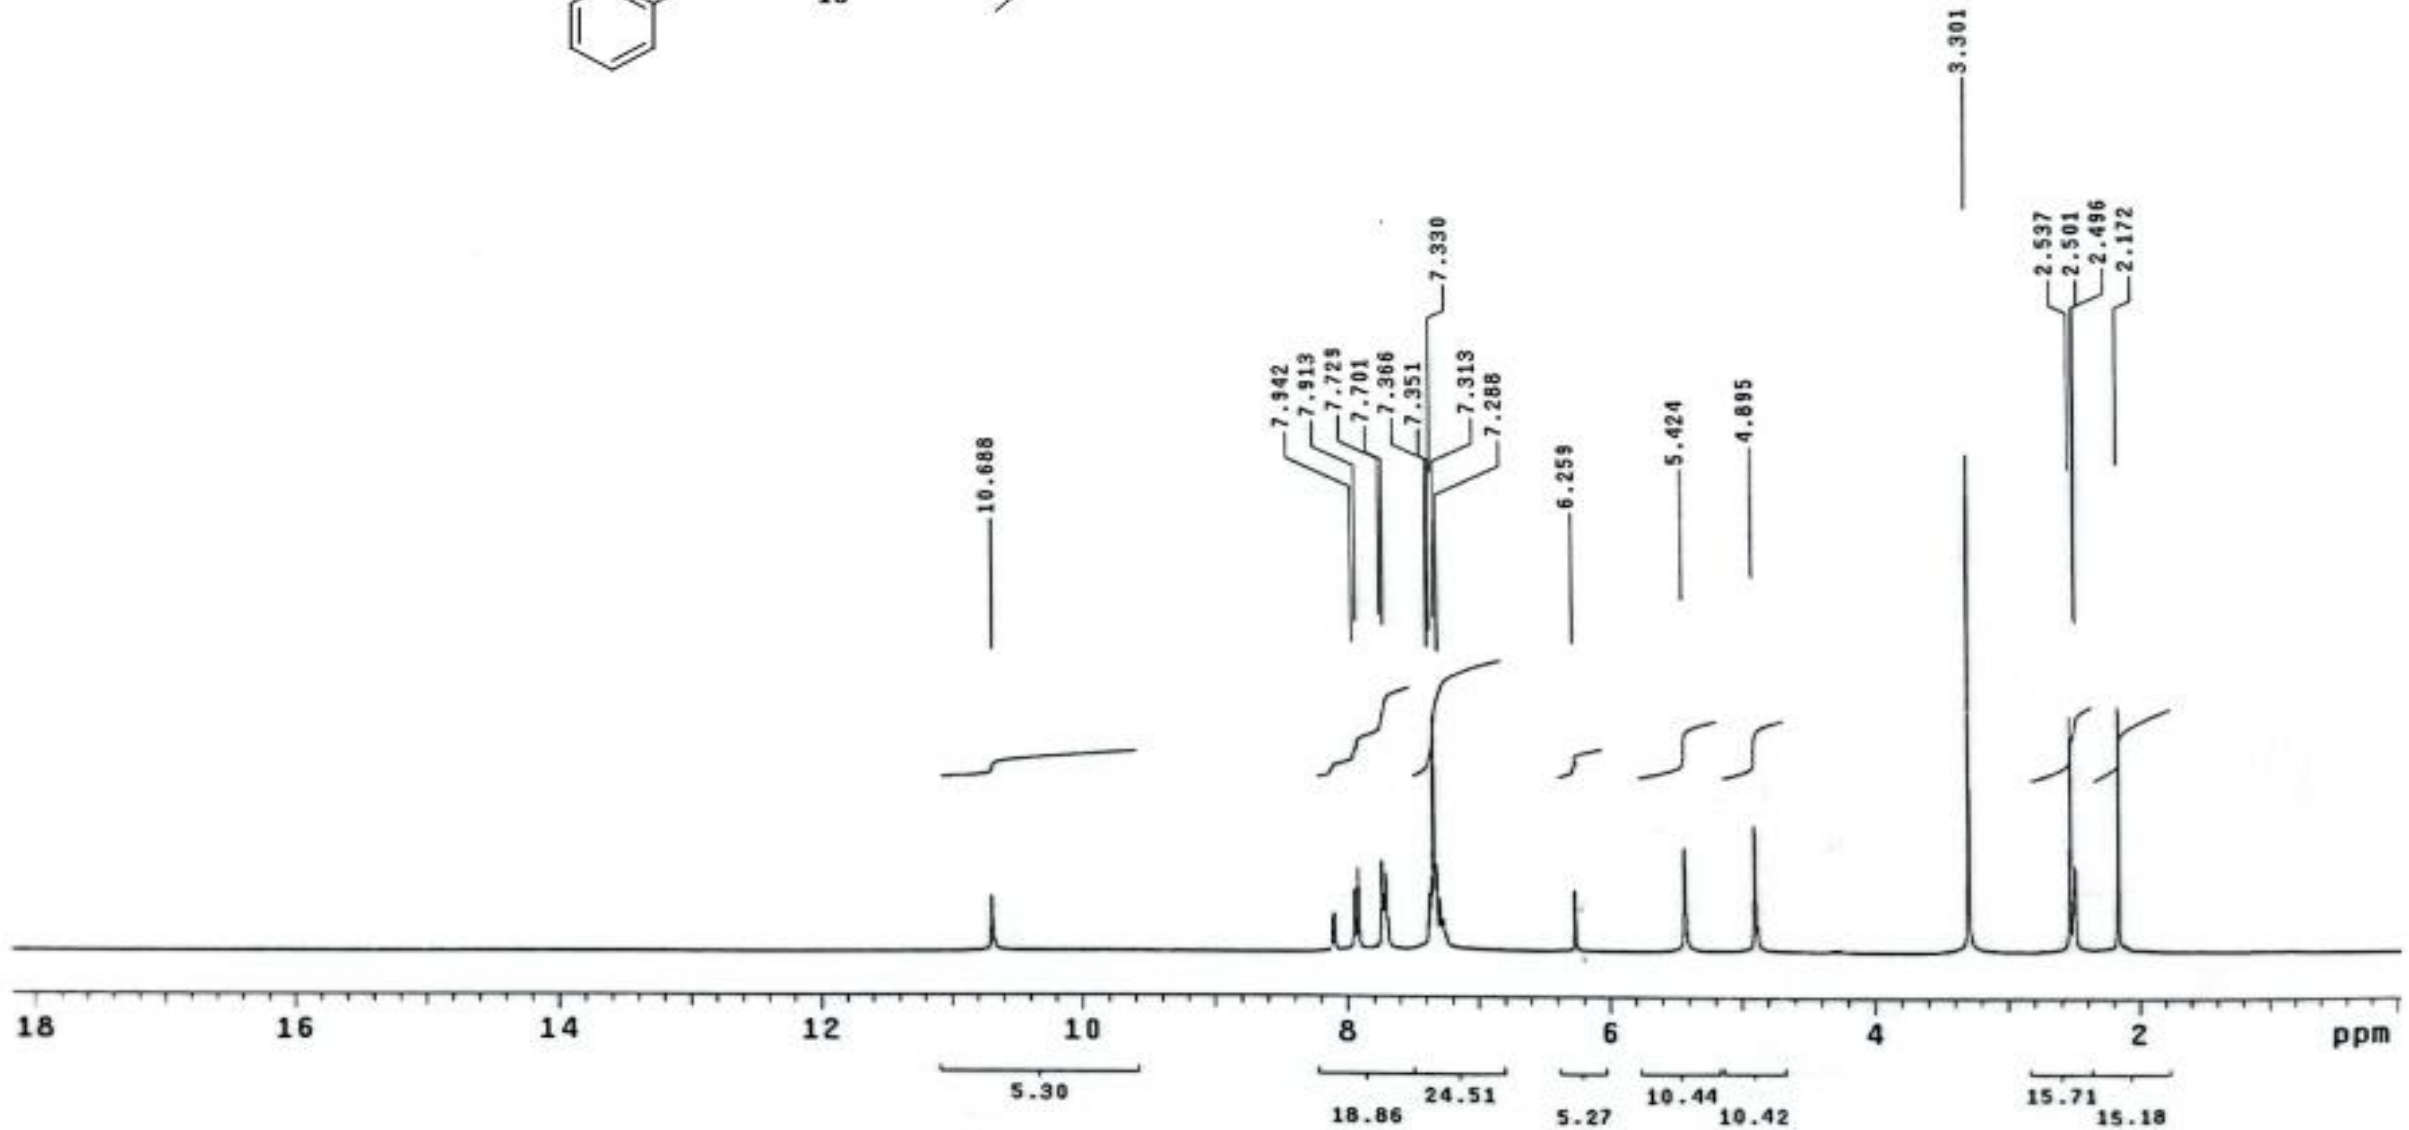

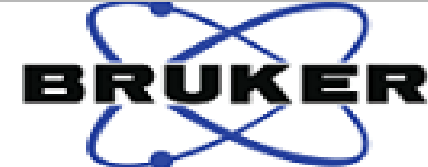

Current Data Parameters

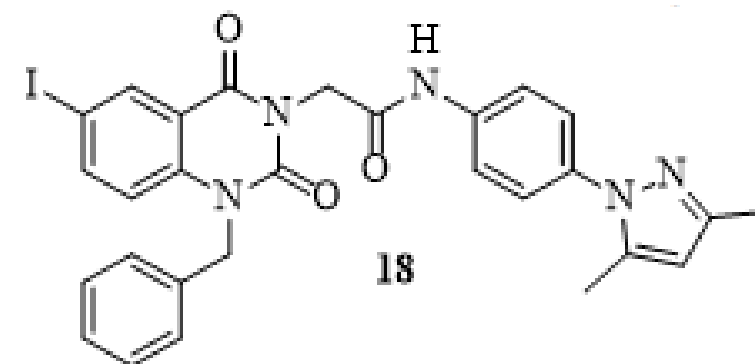

```
-----  
AQ          1.3631488  sec  
RG          205.37  
DW          20.800  usec  
DE          6.50  usec  
TE          300.0  K  
D1          2.0000000  sec  
D11         0.0300000  sec  
TD0         1
```

```
----- CHANNEL f1 -----  
SFO1        100.6278588  MHz  
NUC1         13C  
P1          10.00  usec  
PLW1        47.0000000  W
```

```
----- CHANNEL f2 -----  
SFO2        400.1516006  MHz  
NUC2         1H  
CPDPRG(2)   waltz16  
PCPD2        90.00  usec  
PLW2        18.0000000  W  
PLW12       0.3472200  W  
PLW13       0.2812500  W
```

```
F2 - Processing parameters  
SI          32768  
SF          100.6177975  MHz  
WDW         EM  
SSB         0  
LB          1.00  Hz  
GB          0  
PC          1.40
```

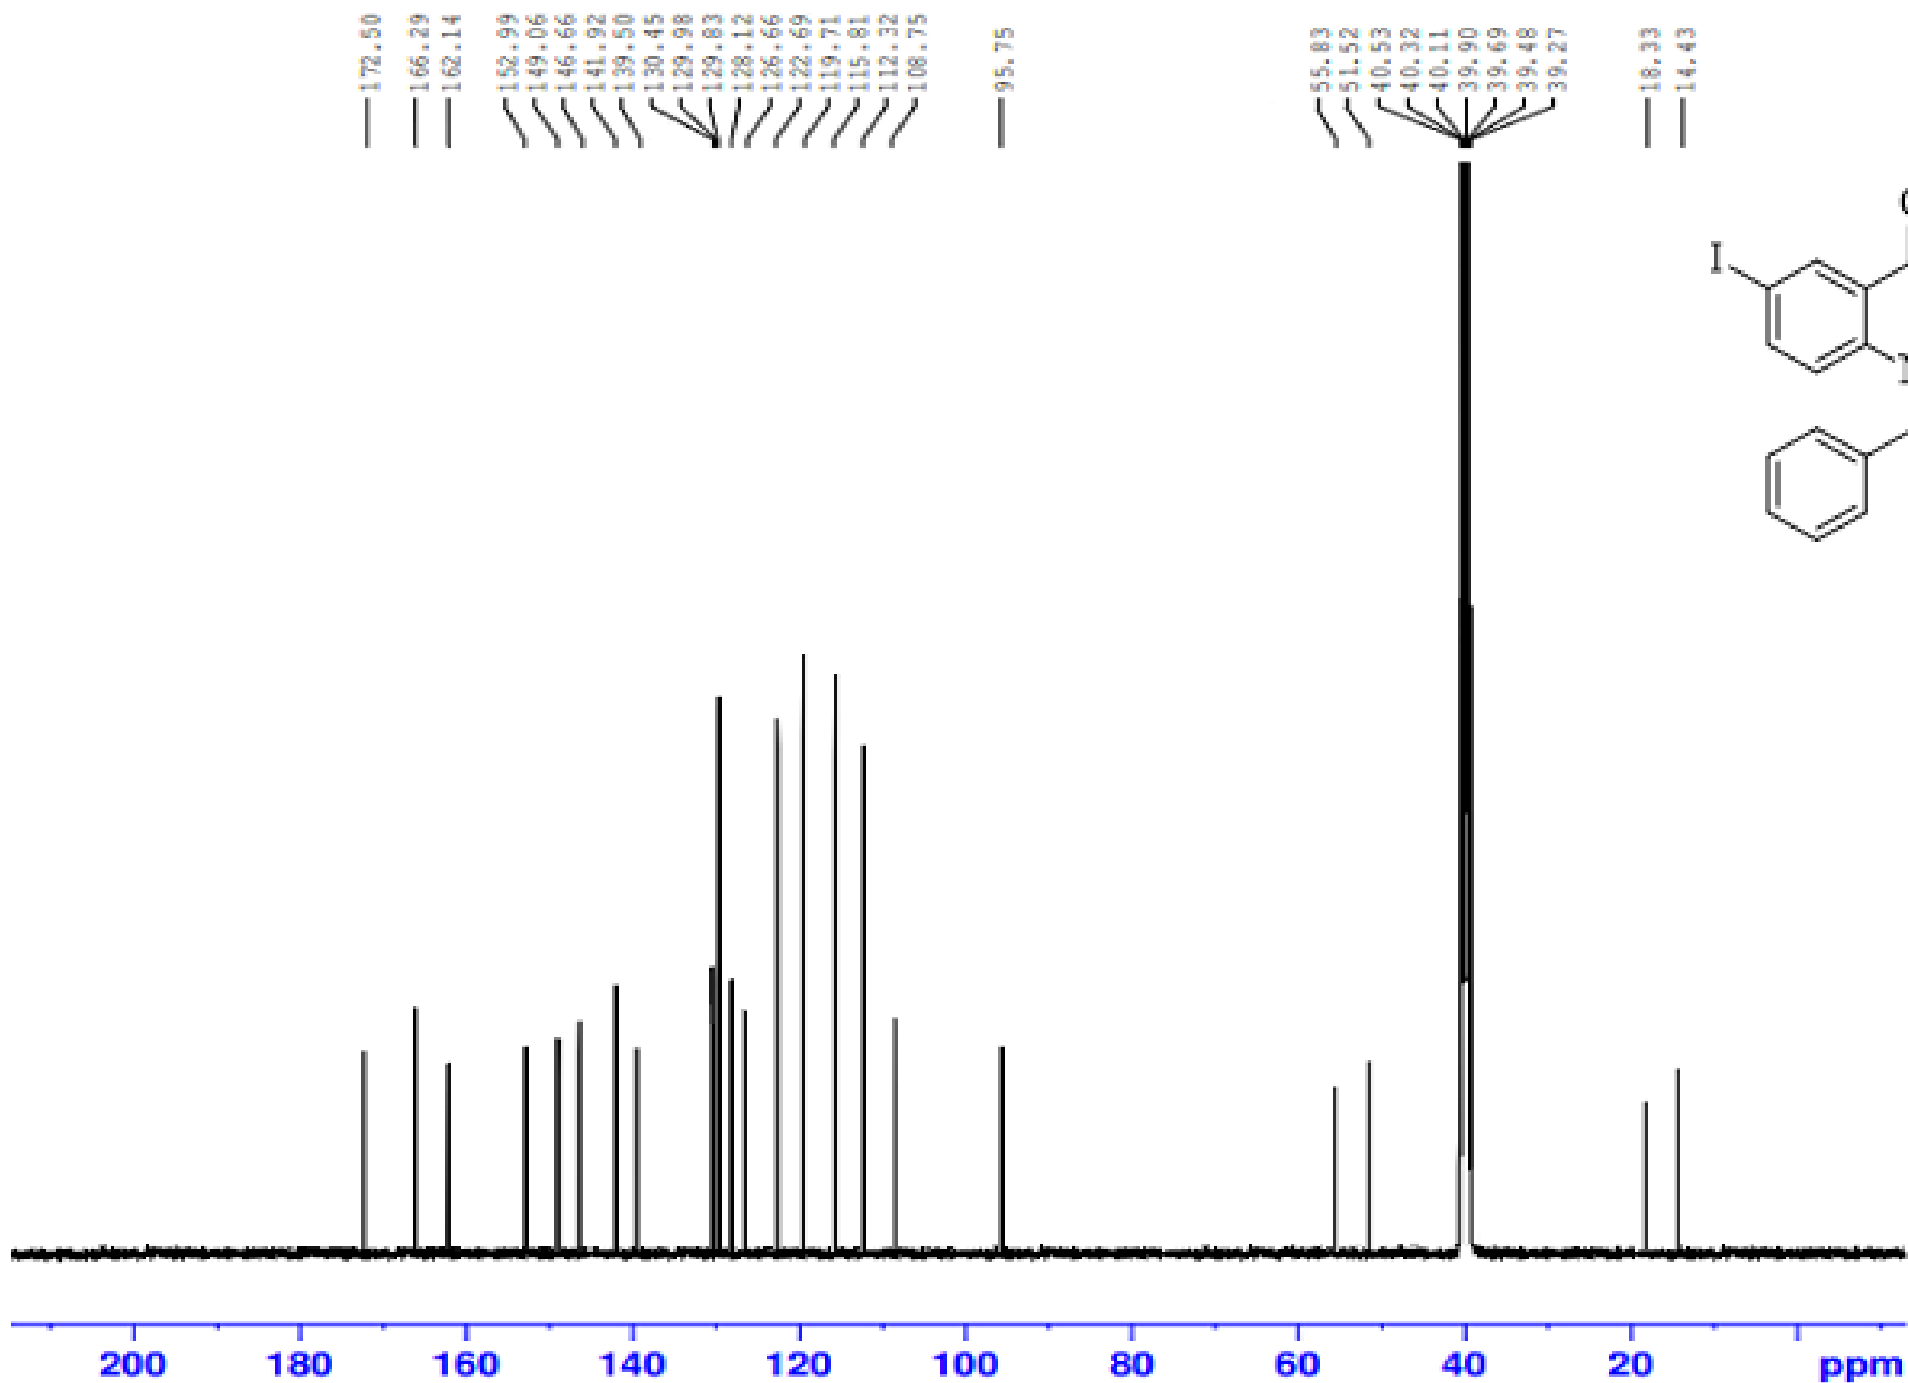

Supplement: d4ra00502c1.pdf [file d4ra00502c1.pdf]
